# Supplementary material for: Protonated Forms of Naringenin and Naringenin Chalcone: Proteiform Bioactive Species Elucidated by IRMPD Spectroscopy, IMS, CID-MS, and Computational Approaches
Source: PubMed Central journal article supplement (PMC9999425; doi:10.1021/acs.jafc.2c07453), 2023-02-27
Supplement: jf2c07453_si_001.pdf [file jf2c07453_si_001.pdf]

## Supporting informations

### **Protonated forms of Naringenin and Naringenin Chalcone: proteiform bioactive species elucidated by IRMPD spectroscopy, IMS, CID-MS, and computational approaches.**

Davide Corinti<sup>a</sup>, Lucretia Rotari<sup>a</sup>, Maria Elisa Crestoni<sup>a</sup>, Simonetta Fornarini<sup>a</sup>, Jos Oomens<sup>b</sup>, Giel Berden<sup>b</sup>, Aura Tintaru<sup>c</sup> and Barbara Chiavarino<sup>a\*</sup>

<sup>a</sup>Dipartimento di Chimica e Tecnologie del Farmaco, Sapienza Università di Roma, Piazzale Aldo Moro 5, 00185 Roma, Italy

<sup>b</sup>Radboud University, FELIX Laboratory, Institute for Molecules and Materials, Toernooiveld 7, Nijmegen, 6525ED, Netherlands

<sup>c</sup>Aix Marseille Univ, CNRS, Centre Interdisciplinaire de Nanoscience de Marseille, CINaM UMR 7325, Marseille, 13288, France

\*corresponding author

## **Contents**

|                                              |     |
|----------------------------------------------|-----|
| Supporting figures.....                      | S2  |
| Operating details.....                       | S25 |
| Supporting tables.....                       | S27 |
| XYZ coordinates of optimized geometries..... | S36 |

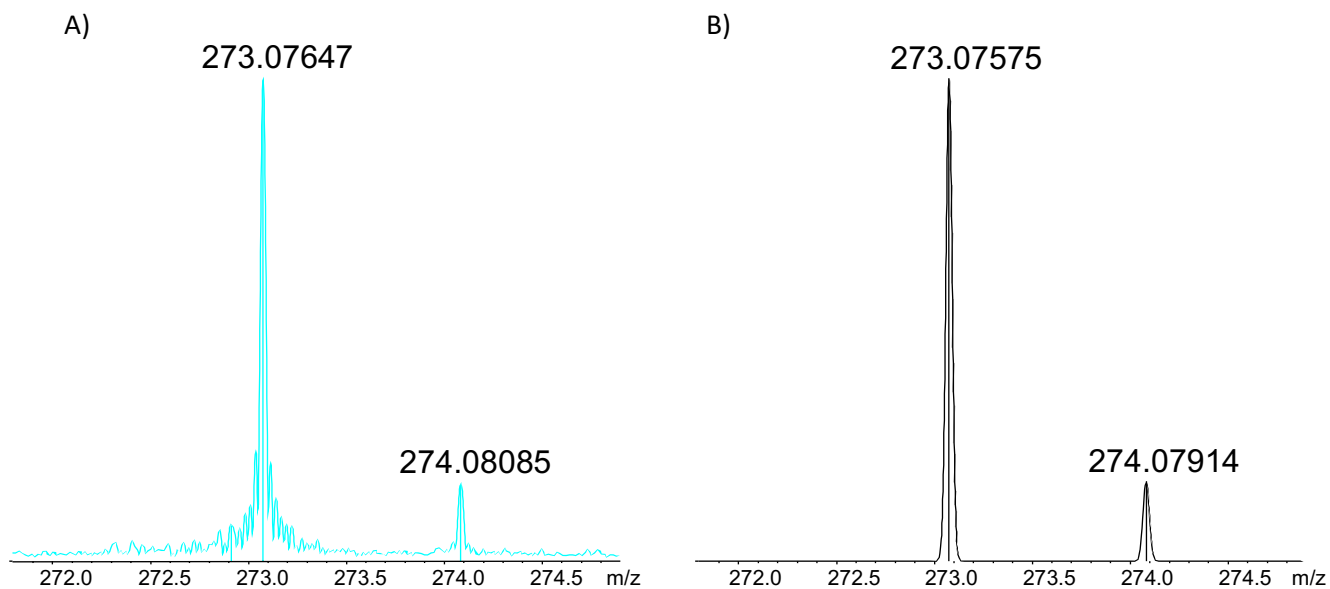

**Figure S1.** ESI FT-ICR mass spectrum of protonated naringenin,  $[\text{Nar}+\text{H}]^+$ . Experimental (panel A, light blue) and theoretical (panel B, black) isotope distribution.

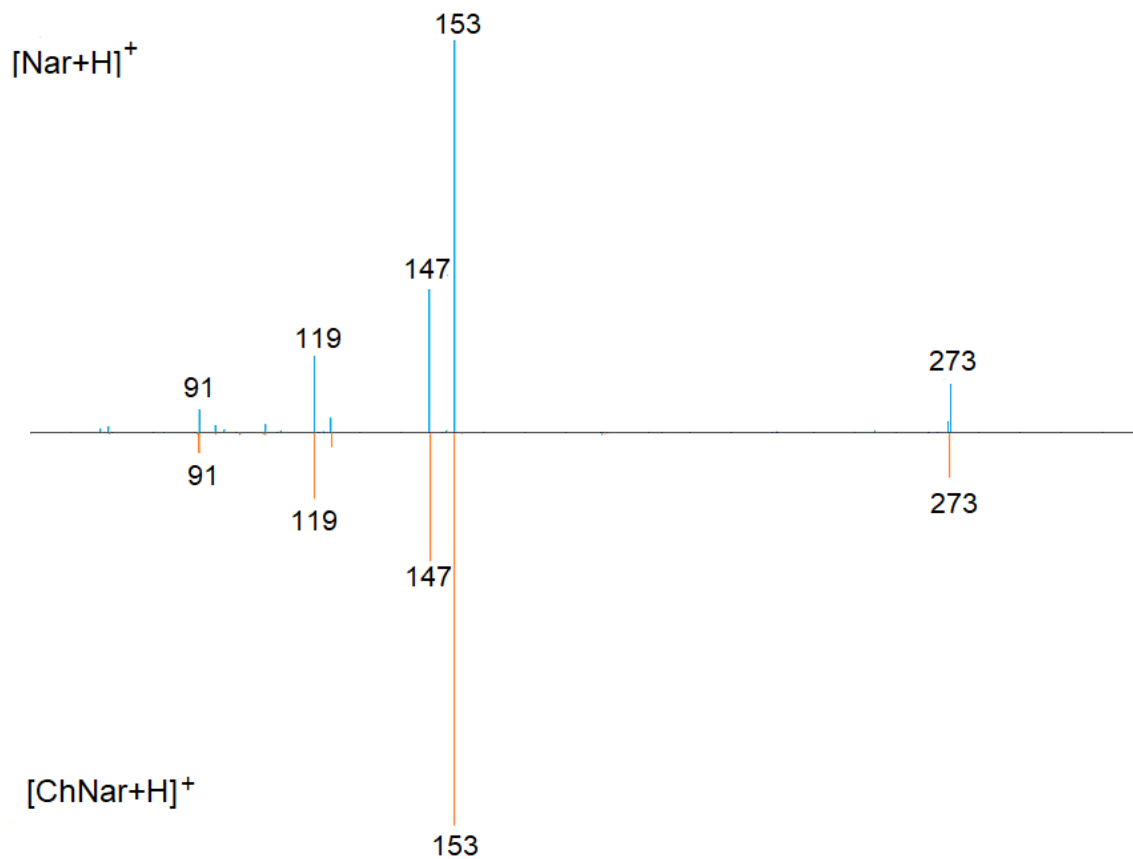

**Figure S2.** Comparison of CID mass spectra of  $[\text{Nar}+\text{H}]^+$  and  $[\text{ChNar}+\text{H}]^+$  (in blue and orange respectively), recorded at CE of 35 eV.

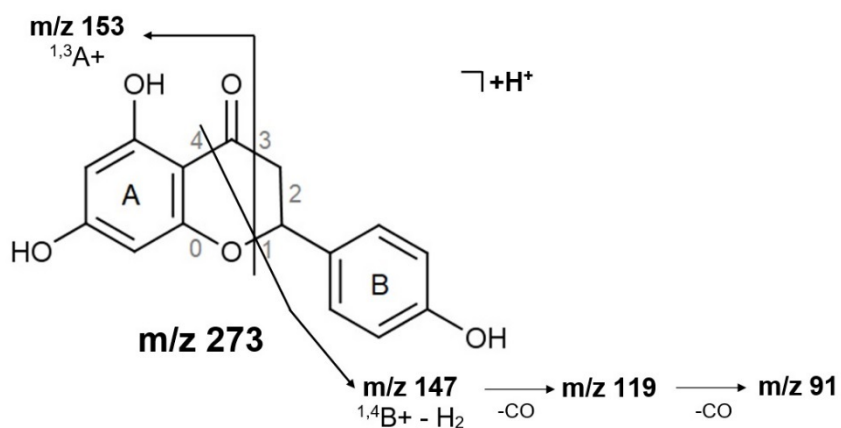

**Scheme S1.** Fragmentation pathways of protonated naringenin. The numbering of the C ring bonds is shown in gray.

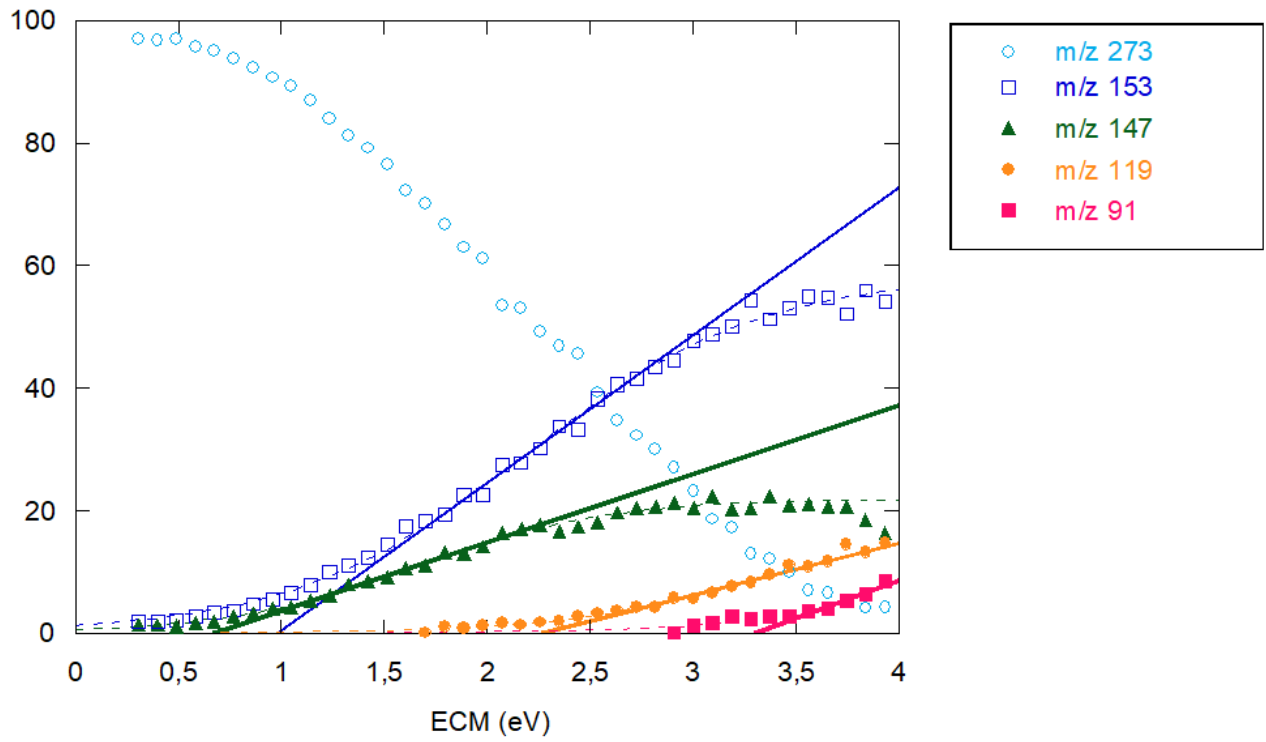

Figure S3. Breakdown curves for [Nar+H]<sup>+</sup> (*m/z* 273 light blue diamond).

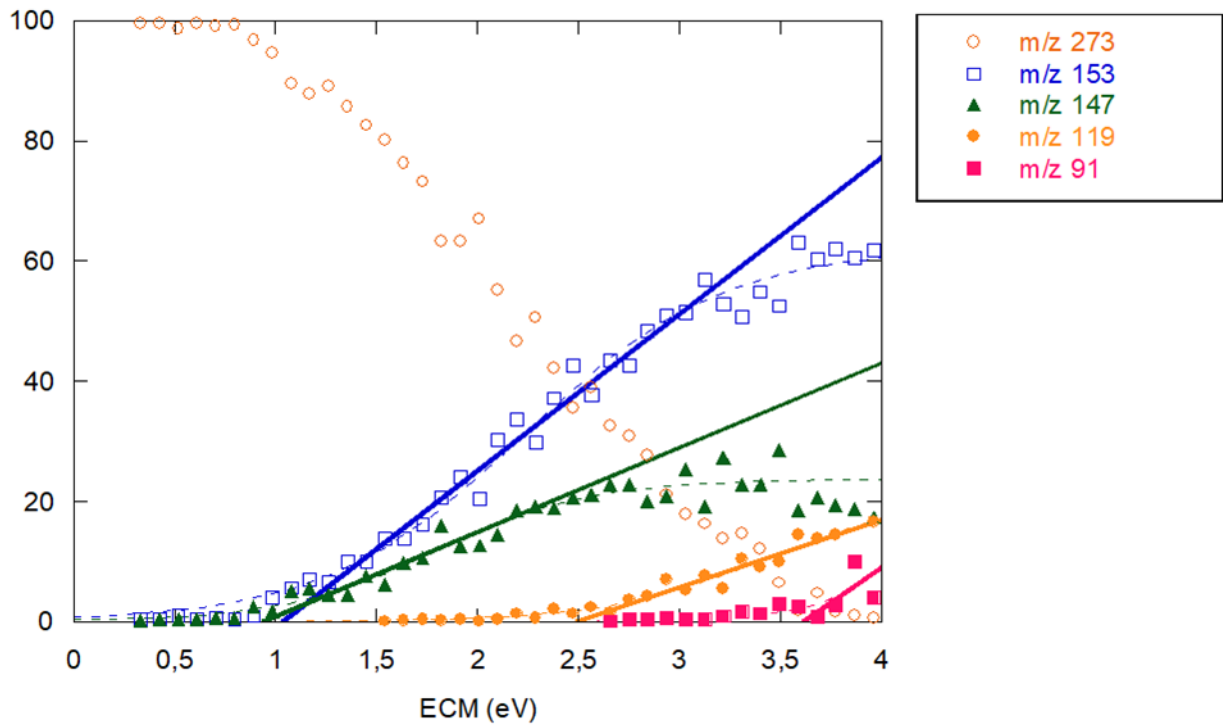

Figure S4. Breakdown curves for [ChNar+H]<sup>+</sup> (*m/z* 273 orange diamond)

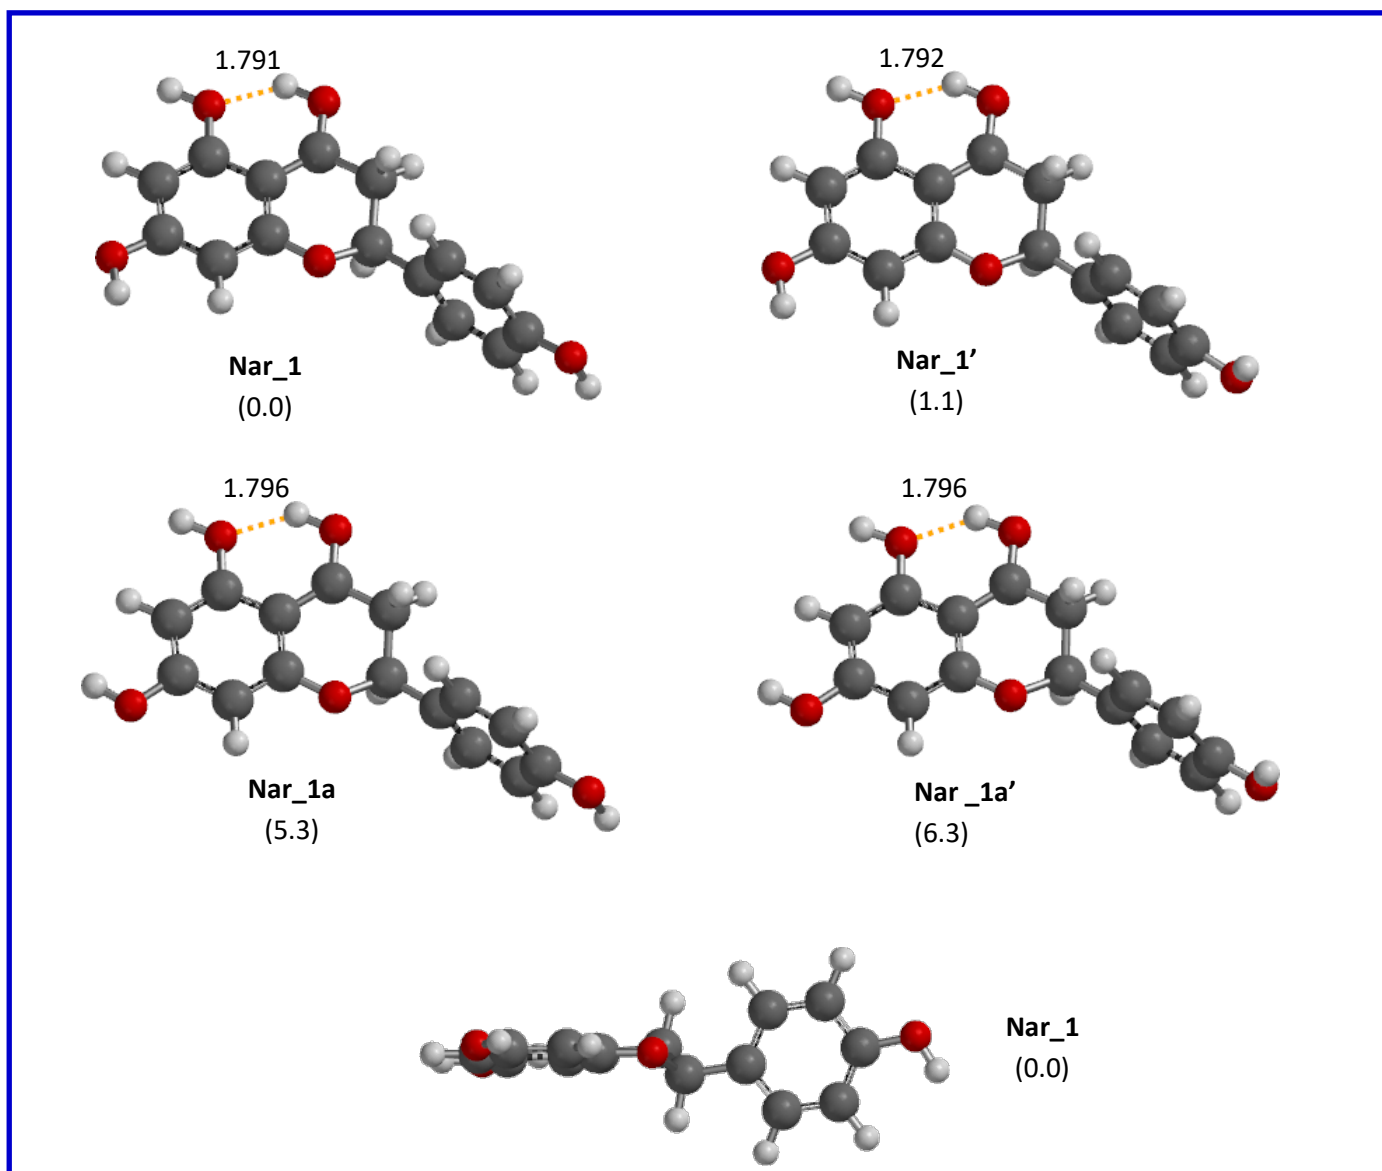

**Figure S5.** Optimized geometries and relative free energies (kJ mol<sup>-1</sup>, in parenthesis) of conformers with 4-hydrophenyl group in equatorial position, belonging to the **Nar\_1** family, calculated at the B3LYP/6-311++G(d,p) level of theory. The relative free energies are calculated with respect to the global minimum **Nar\_1**. Distances are given in Å.

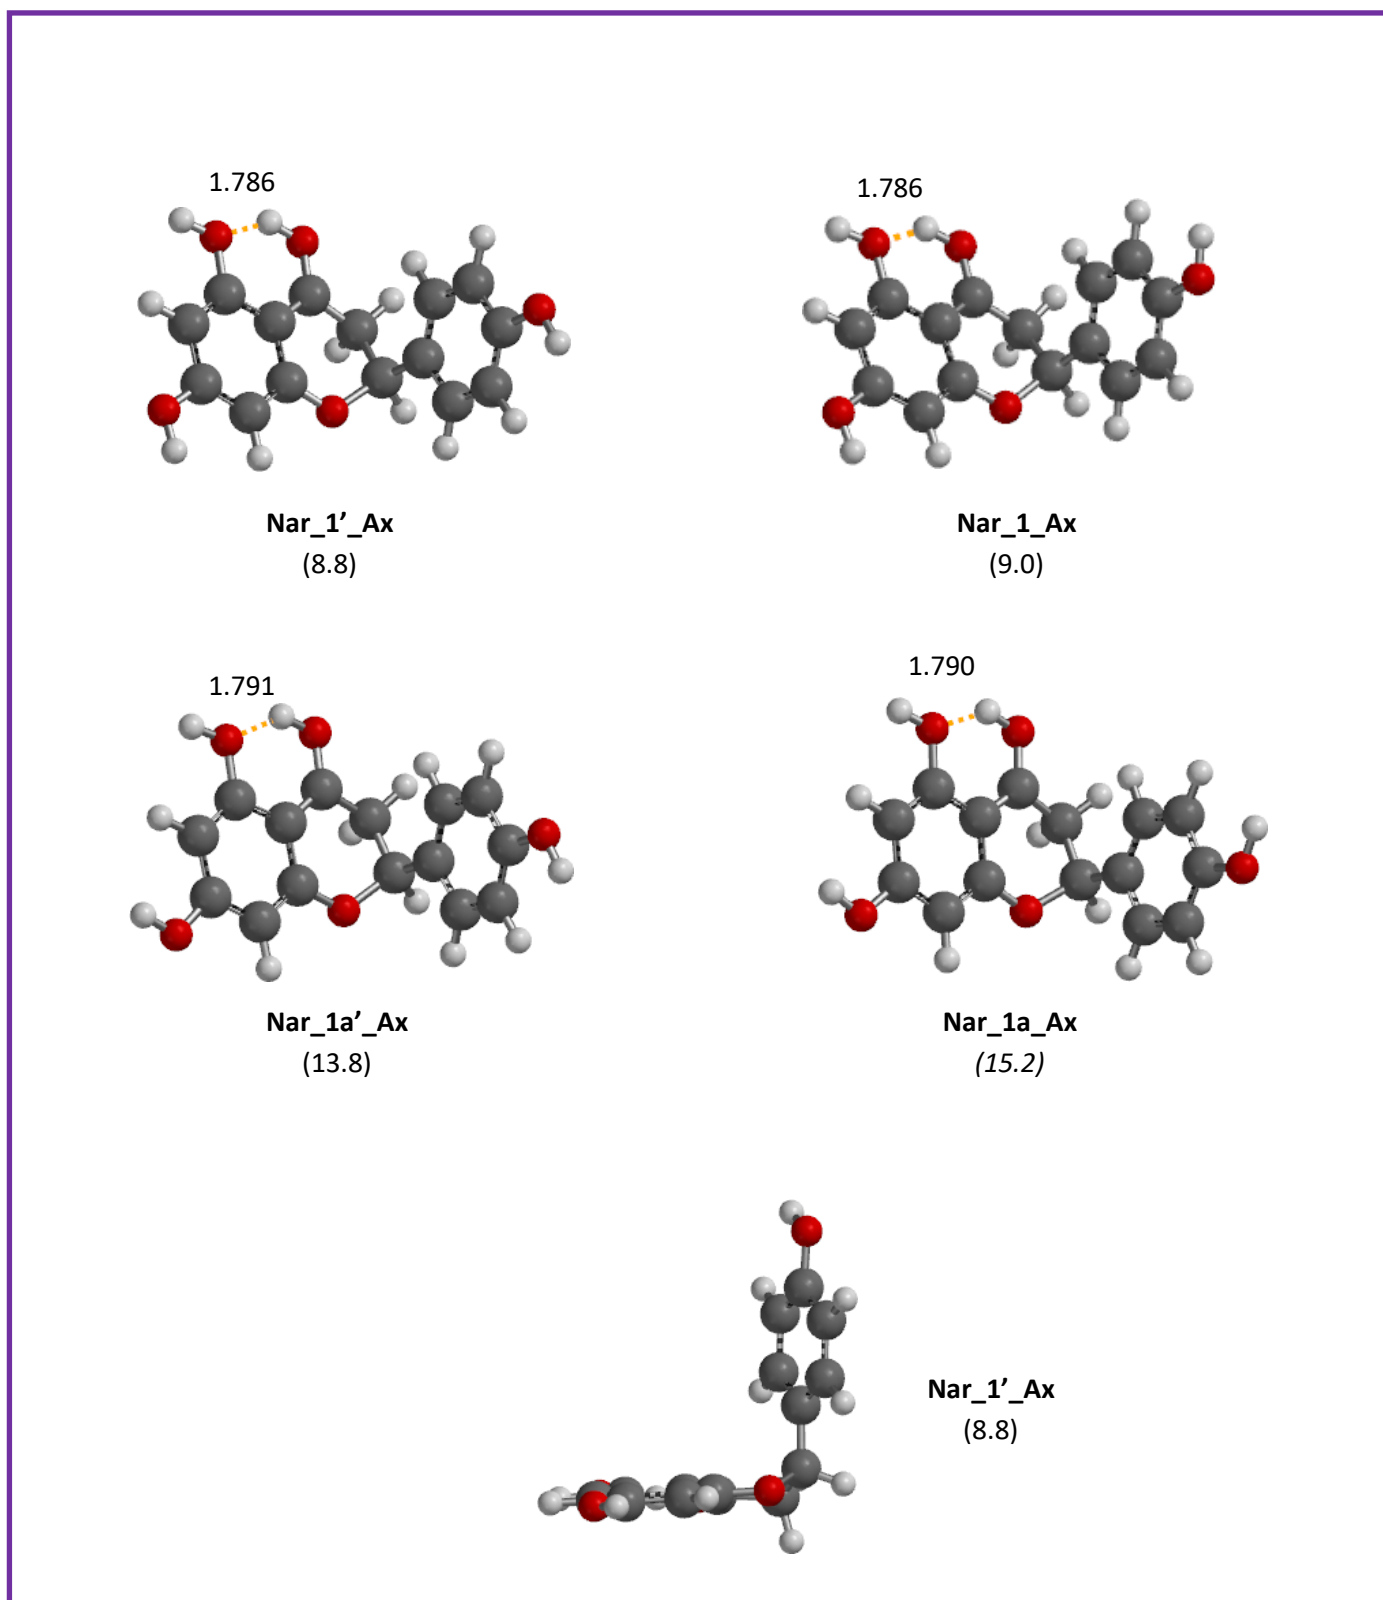

**Figure S6.** Optimized geometries and relative free energies ( $\text{kJ mol}^{-1}$ , in parenthesis) of **Nar\_1** family conformers with 4-hydrophenyl group in axial position, calculated at the B3LYP/6-311++G(d,p) level of theory. The relative free energies are calculated with respect to the global minimum **Nar\_1**. Distances are given in Å.

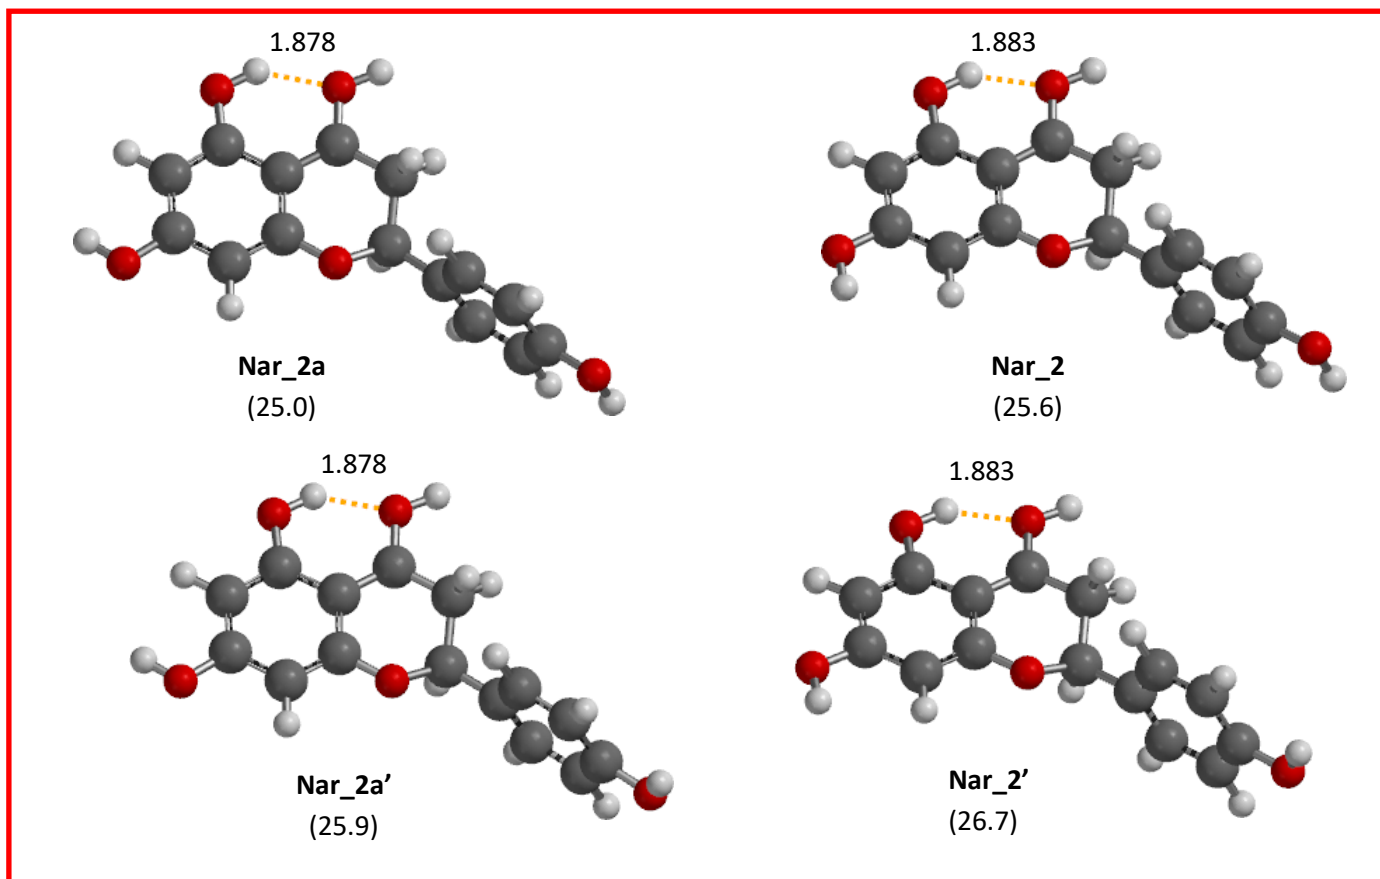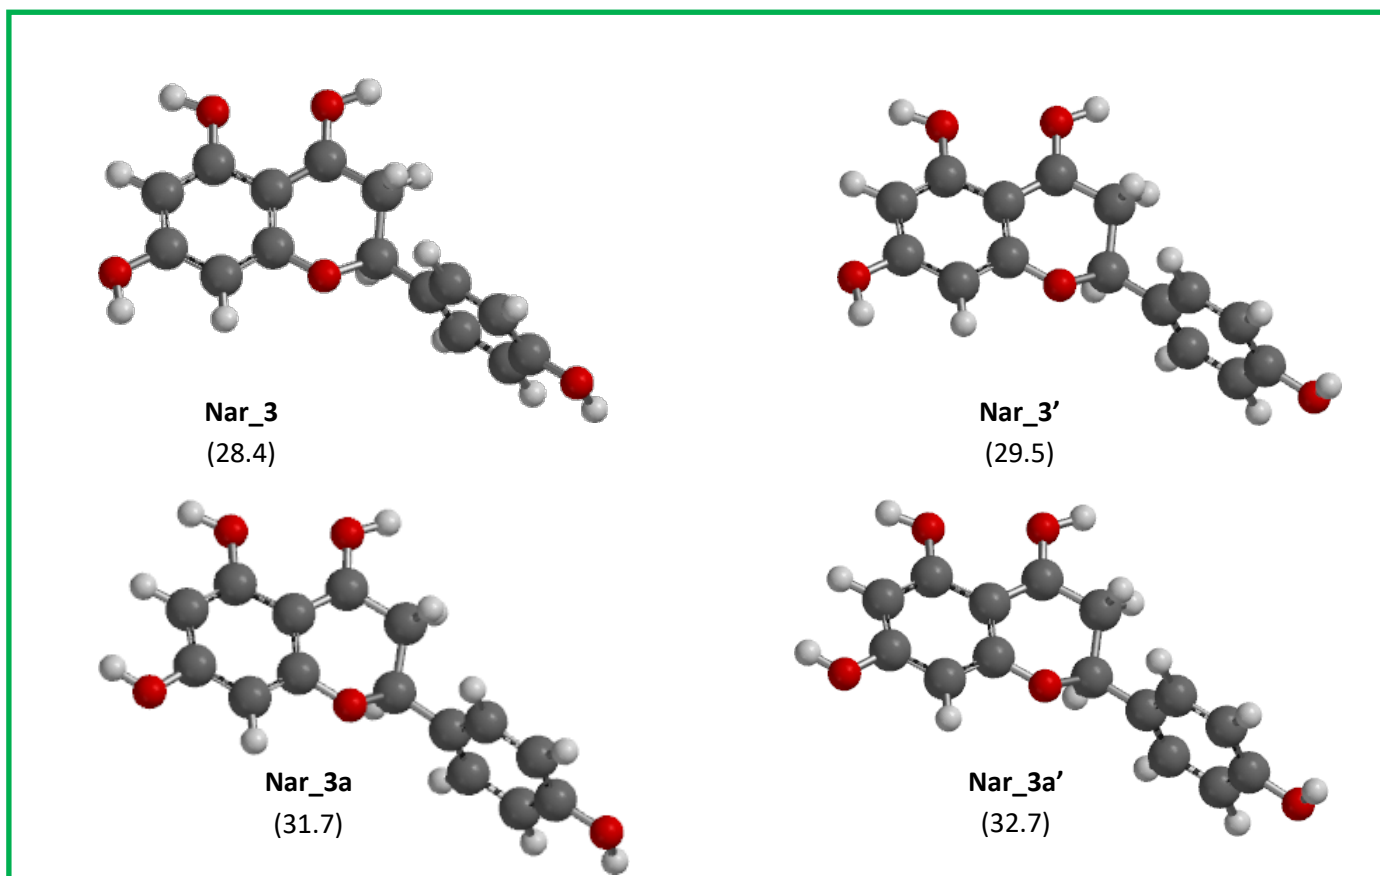

**Figure S7.** Optimized geometries and relative free energies (kJ mol<sup>-1</sup>, in parenthesis) of conformers with 4-hydrophenyl group in equatorial position, belonging to the **Nar\_2** (upper red panel) and **Nar\_3** (lower, green panel) families, calculated at the B3LYP/6-311++G(d,p) level of theory. The relative free energies are calculated with respect to the global minimum **Nar\_1**. Distances are given in Å.

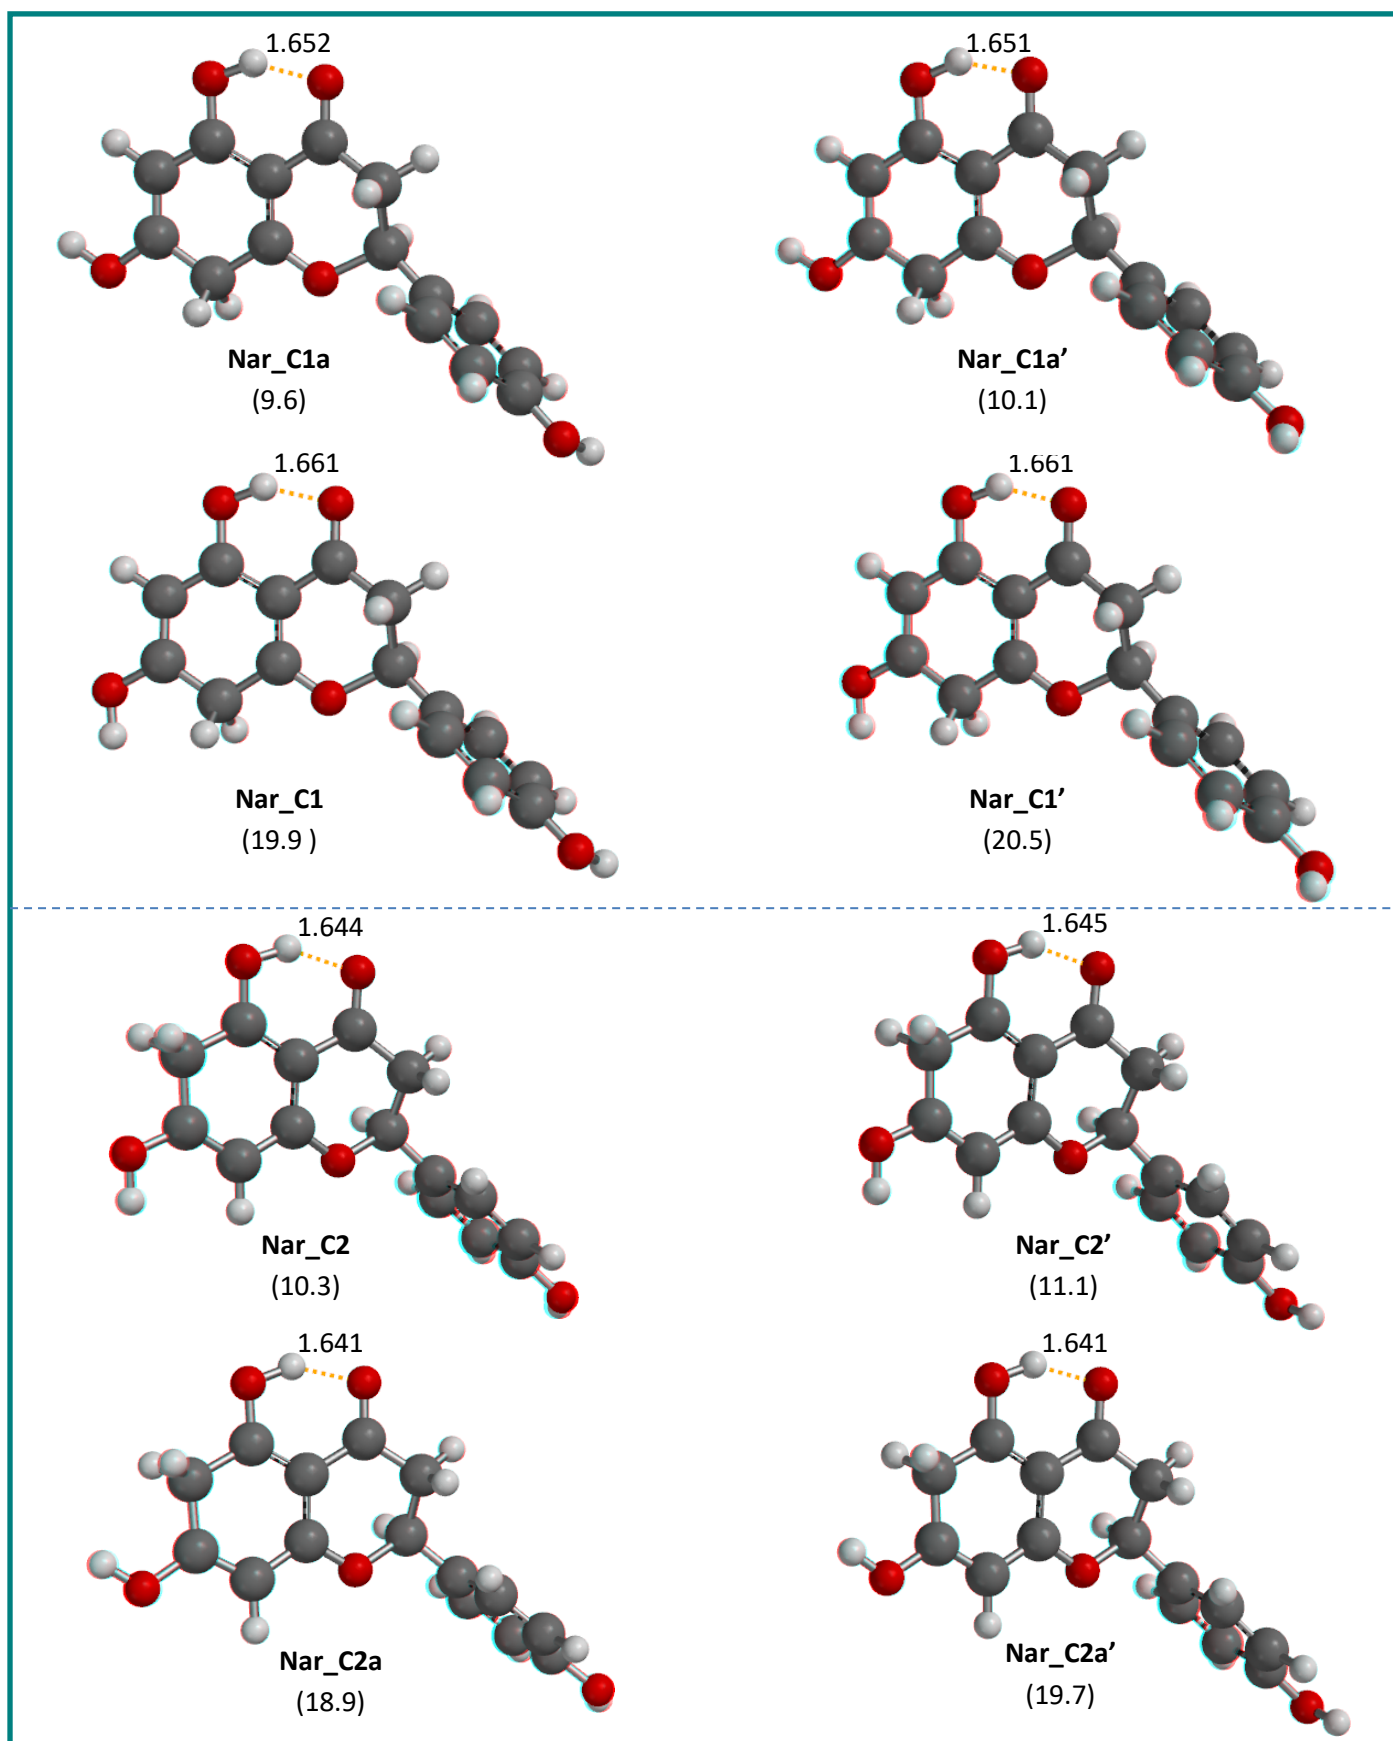

**Figure S8.** Optimized geometries and relative free energies (kJ mol<sup>-1</sup>, in parenthesis) of conformers with 4-hydrophenyl group in equatorial position, belonging to the **Nar\_C1** (upper panel) and **Nar\_C2** (lower panel) families, calculated at the B3LYP/6-311++G(d,p) level of theory. The relative free energies are calculated with respect to the global minimum **Nar\_1**. Distances are given in Å.



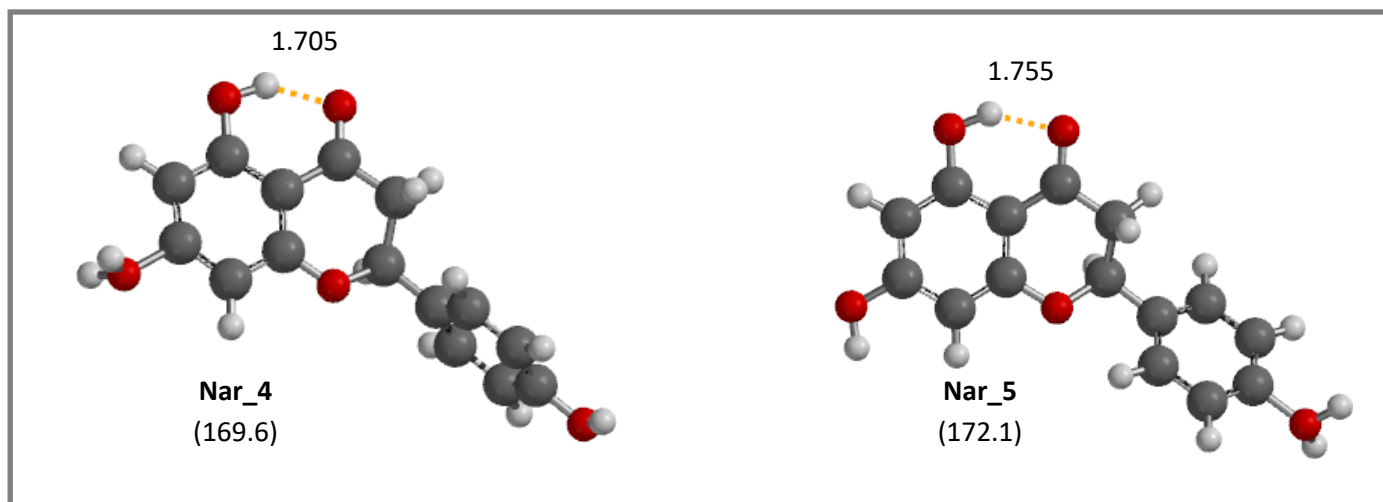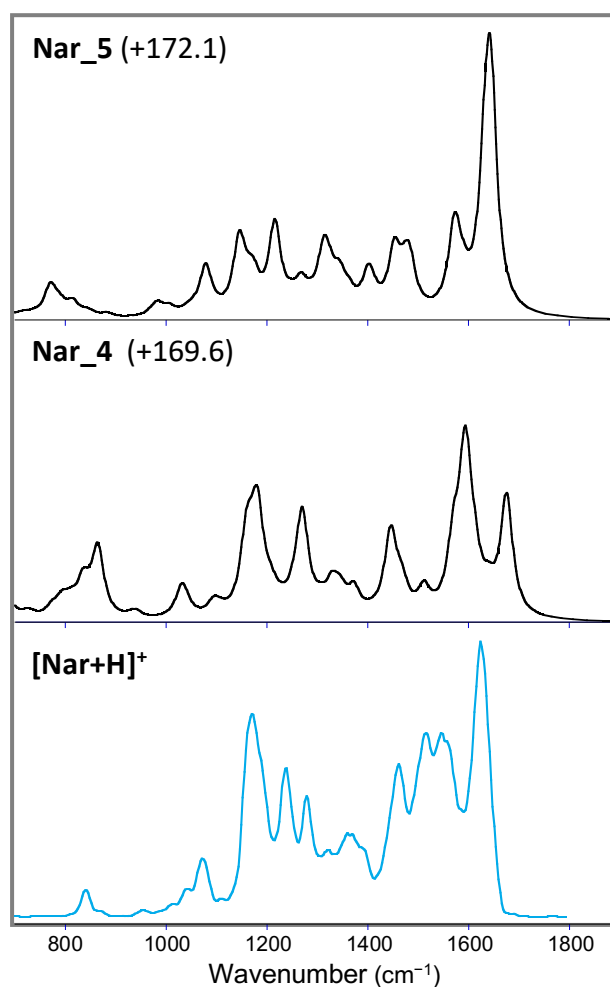

**Figure S9.** Experimental IRMPD spectrum of  $[[\text{Nar}+\text{H}]^+]$  (light blue profile) compared with the IR spectra calculated for representative isomers of naringenin protonated on 7-OH (**Nar\_4**) or 4'-OH (**Nar\_5**) position, whose optimized geometries are shown on the upper panel. Optimized geometries and IR calculated spectra are computed at the B3LYP/6-311++G(d,p) level of theory. The relative free energies ( $\text{kJ mol}^{-1}$ ) with respect to the global minimum **Nar\_1** are reported in parenthesis. Distances are given in Å. Calculated IR intensities (y-axis) are reported in the same scale ( $0\text{-}1000 \text{ Km mol}^{-1}$ )

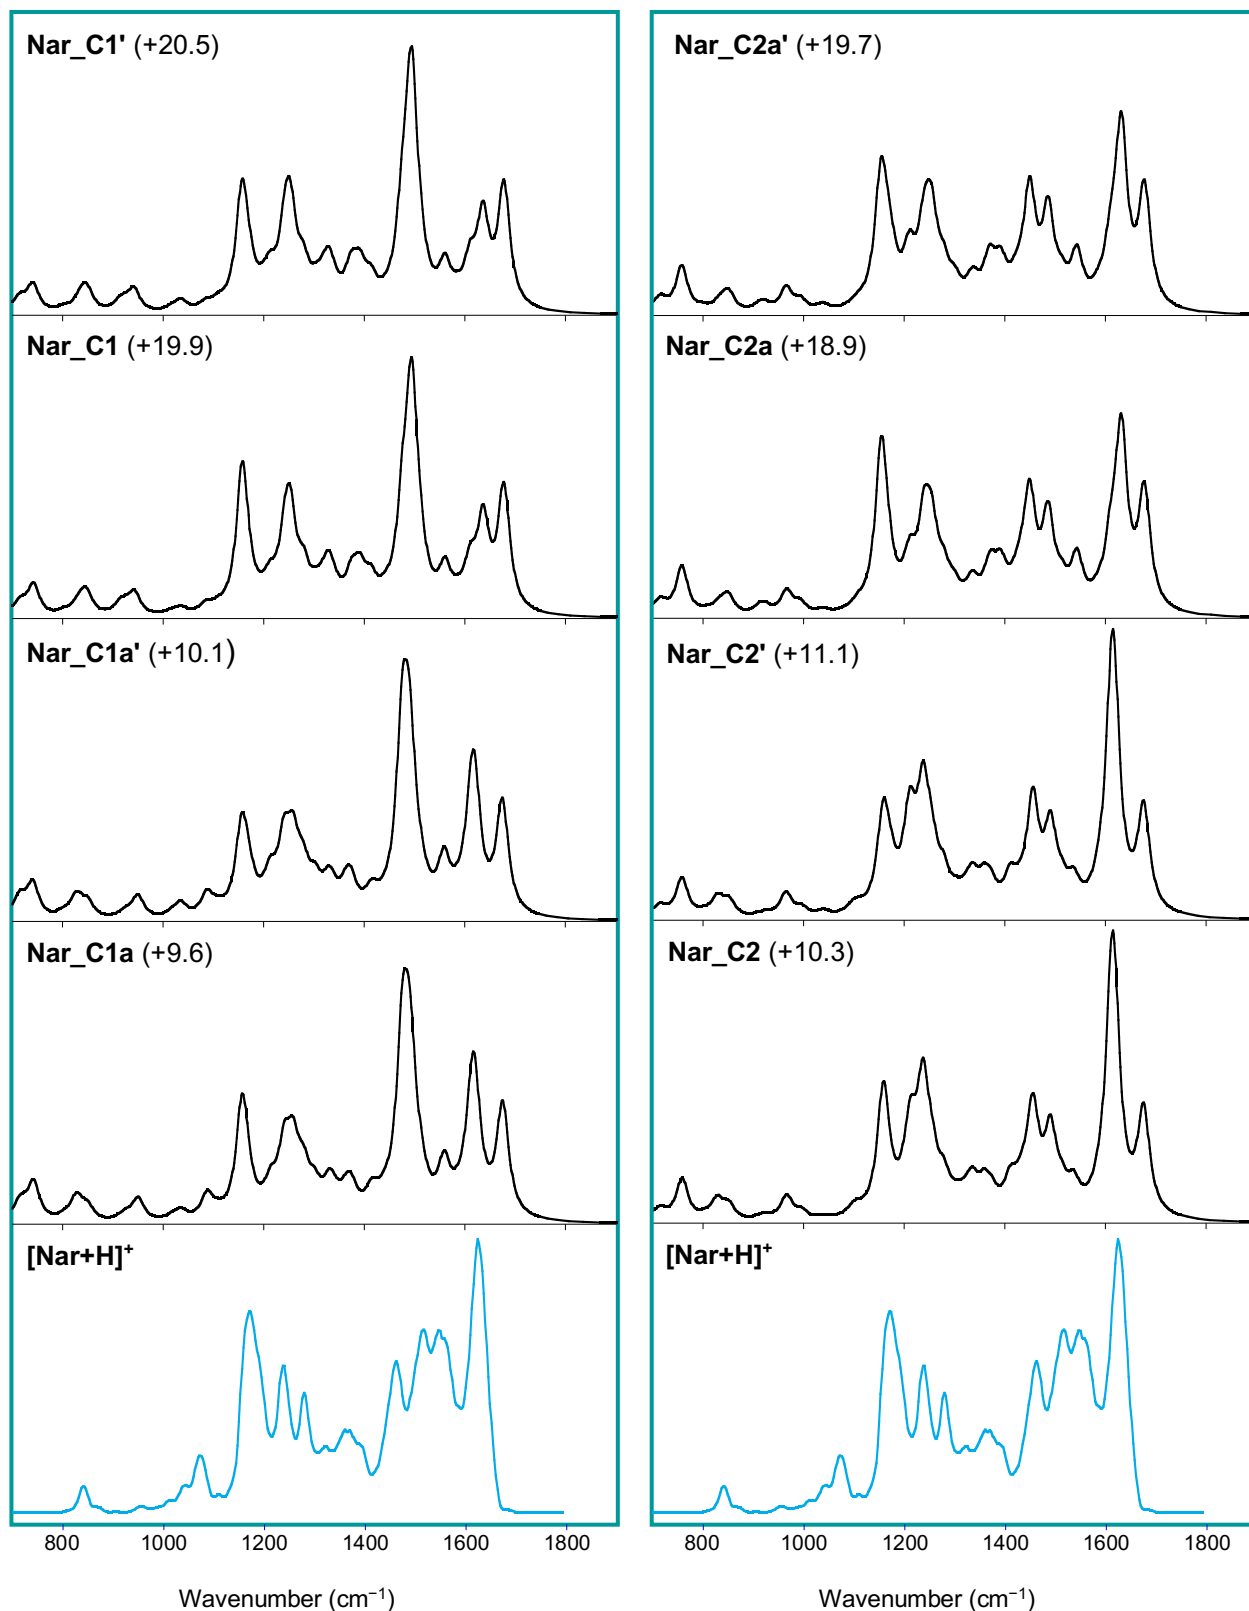

**Figure S10.** IRMPD spectrum (light blue profile) compared to the calculated IR spectra (black profiles) of the four lowest lying conformers of protonated naringenin, protonated in C8 (**Nar\_C1a**, **Nar\_C1'**, **Nar\_C1** and **Nar\_C1'**, left panel), and in C6 position (**Nar\_C2**, **Nar\_C2'**, **Nar\_C2a** and **Nar\_C2a'**, right panel). Free energies relative to **Nar\_1**, are reported in parenthesis (kJ mol<sup>-1</sup>). Calculated IR intensities (y-axis) are plotted in the same scale (0-1200 Km mol<sup>-1</sup>)

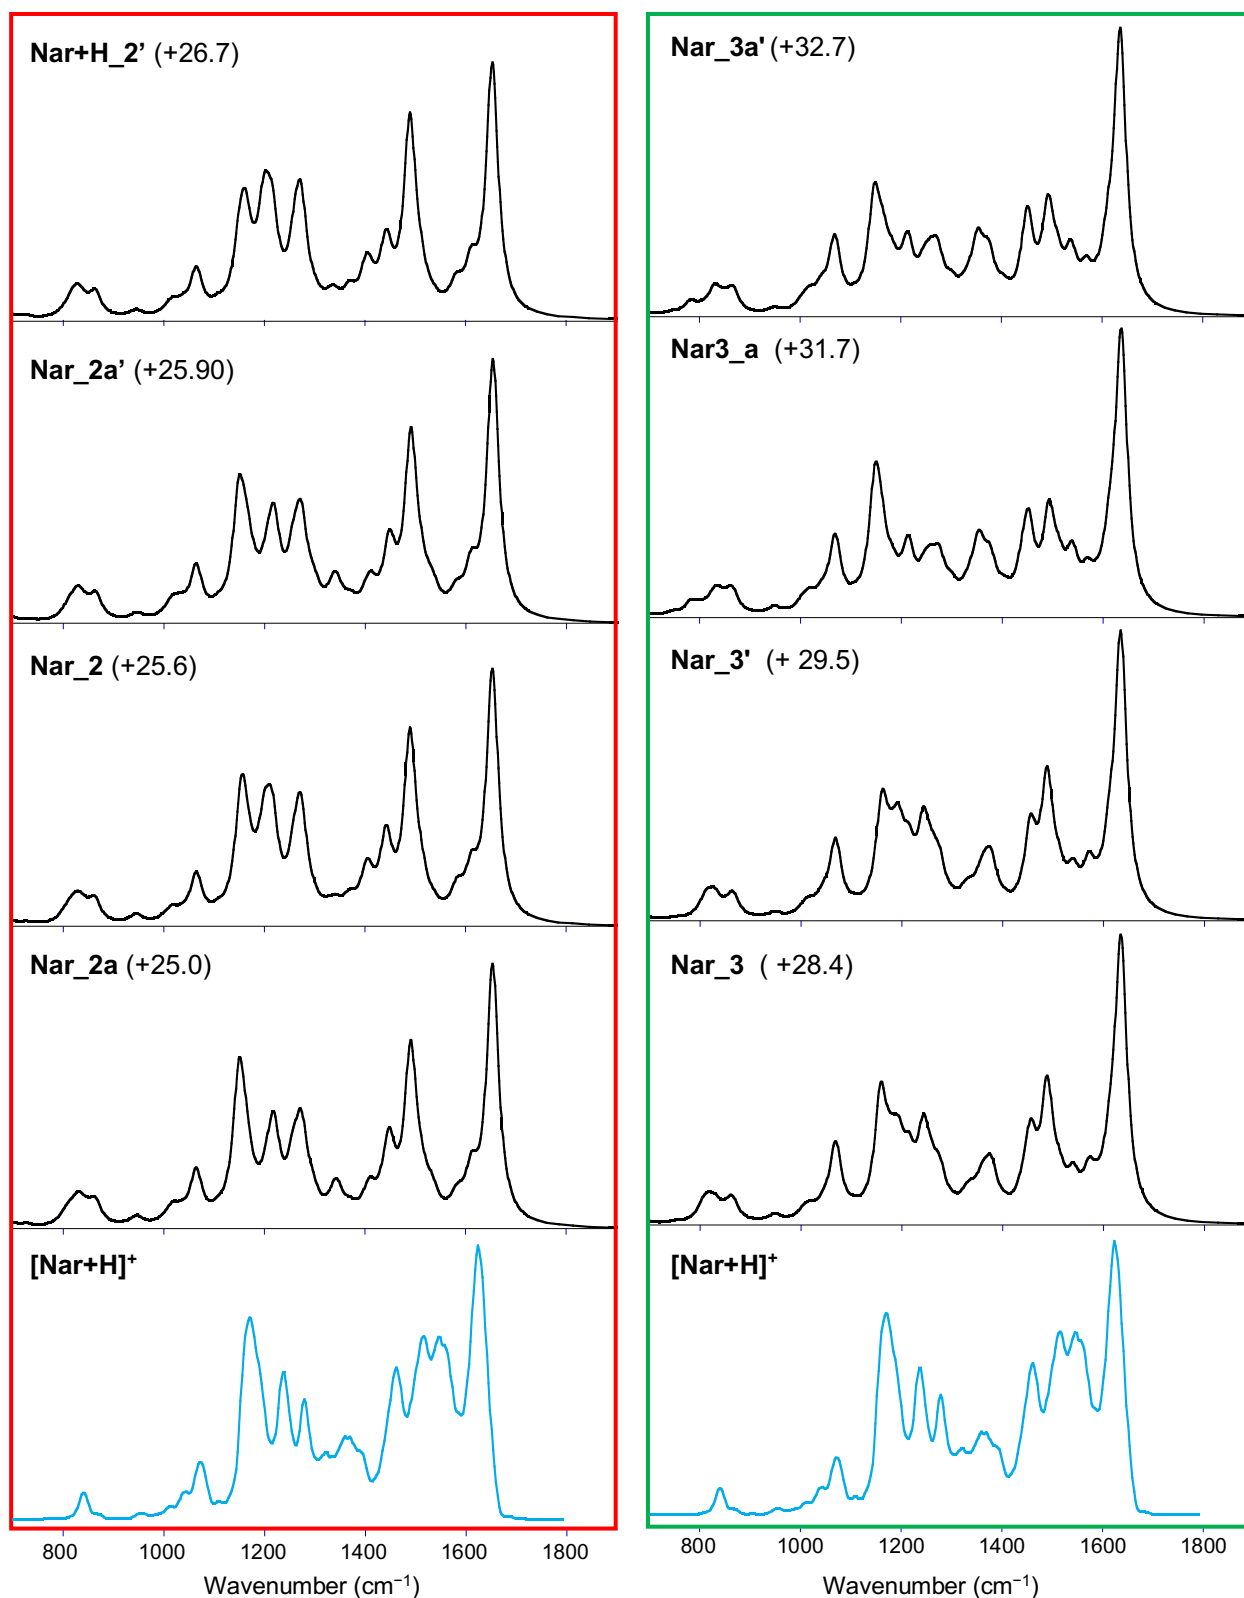

**Figure S11.** IRMPD spectrum (light blue profile) compared to the calculated IR spectra (black profiles) of the four lowest lying conformers of protonated naringenin, with clockwise orientation of both hydrogen atoms in 5OH and 4OH position (**Nar\_2a**, **Nar\_2**, **Nar\_2a'** and **Nar\_2'**, red panel), and without H-bonding motif between 5OH and 4OH (**Nar\_3**, **Nar\_3'**, **Nar\_3a** and **Nar\_3a'**, green panel). Free energies relative to **Nar\_1**, are reported in parenthesis ( $\text{kJ mol}^{-1}$ ). Calculated IR intensities (y-axis) are plotted in the same scale ( $0\text{-}1200 \text{ Km mol}^{-1}$ )

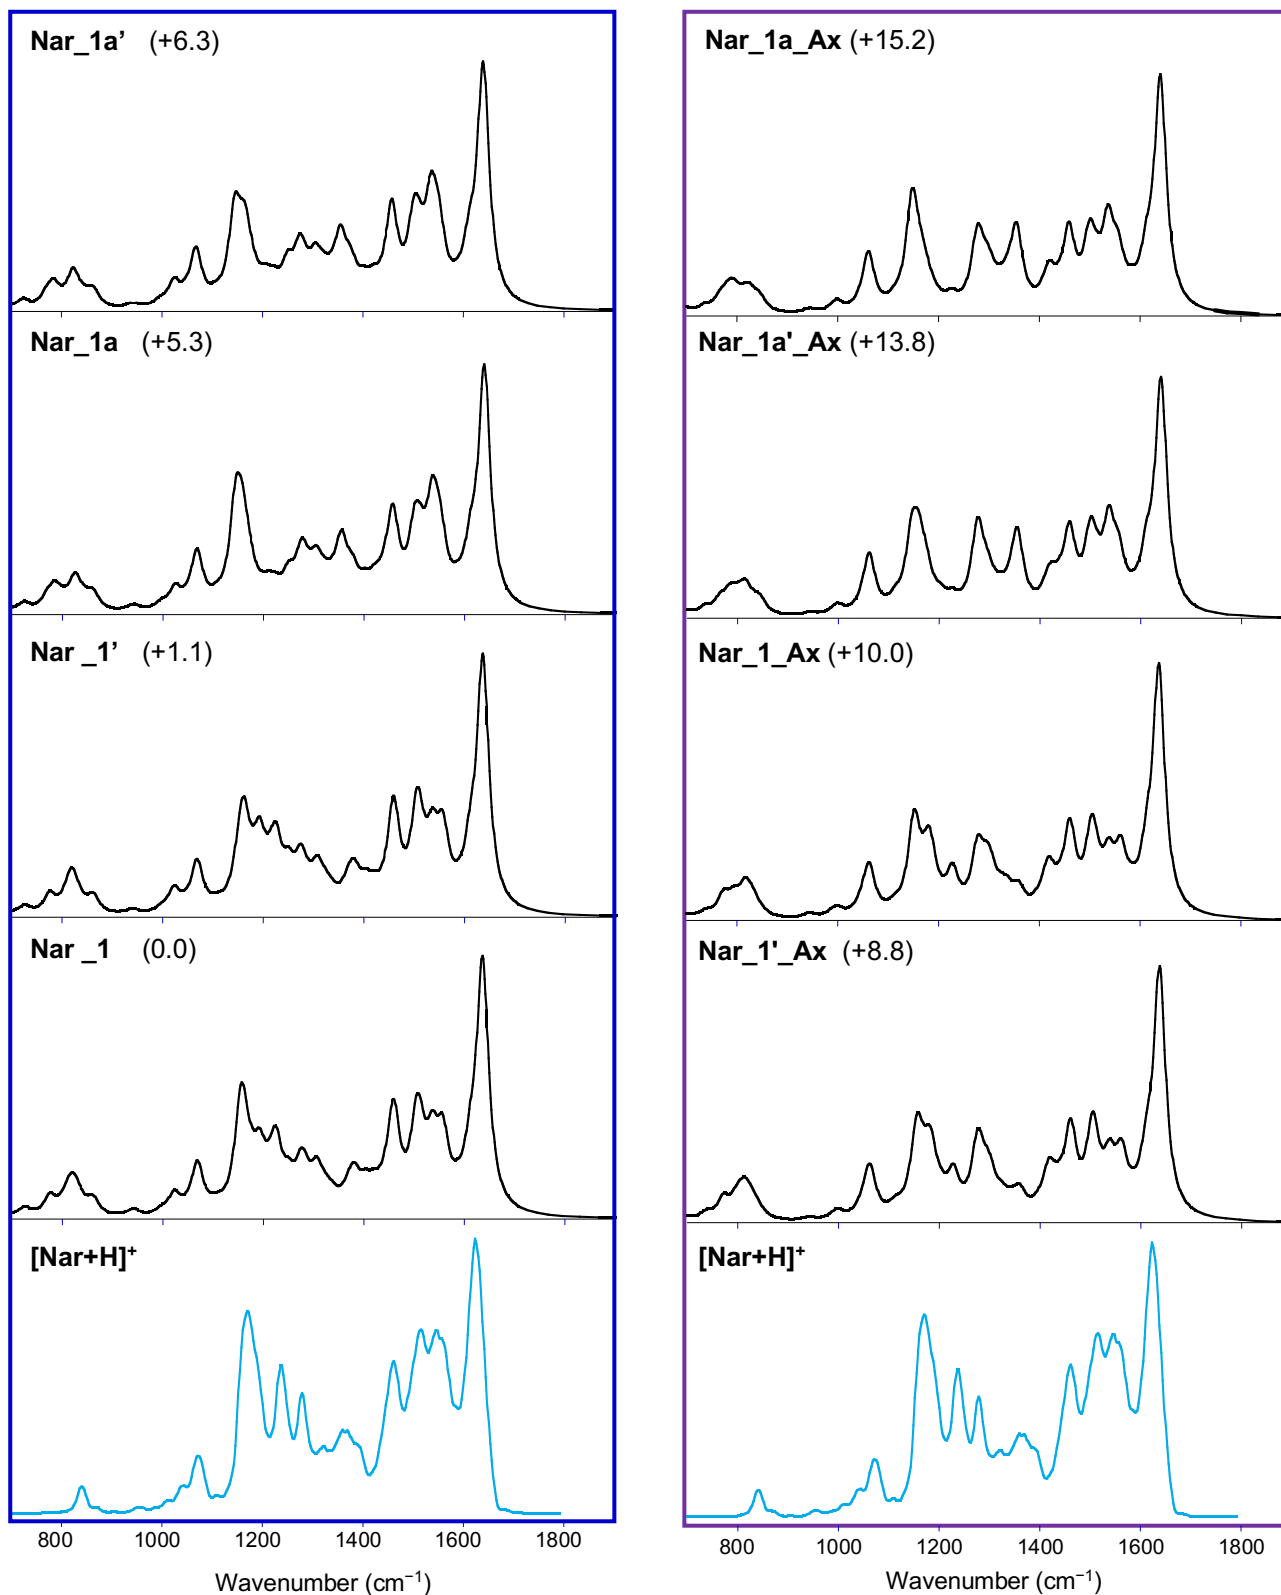

**Figure S12.** IRMPD spectrum (light blue profile) compared to the calculated IR spectra (black profiles) of the four lowest lying conformers of protonated naringenin, belonging to the *Nar\_1* family that carry the B-ring in 1) equatorial position (**Nar\_1**, **Nar\_1'**, **Nar\_1a** and **Nar\_1a'**, left, blue panel), or 2) in axial position (**Nar\_1'\_Ax**, **Nar\_1\_Ax**, **Nar\_1a'\_Ax** and **Nar\_1a'\_Ax**, right scarlet panel). Free energies relative to **Nar\_1**, are reported in parenthesis ( $\text{kJ mol}^{-1}$ ). Calculated IR intensities (y-axis) are plotted in the same scale ( $0\text{-}1200 \text{ Km mol}^{-1}$ ).

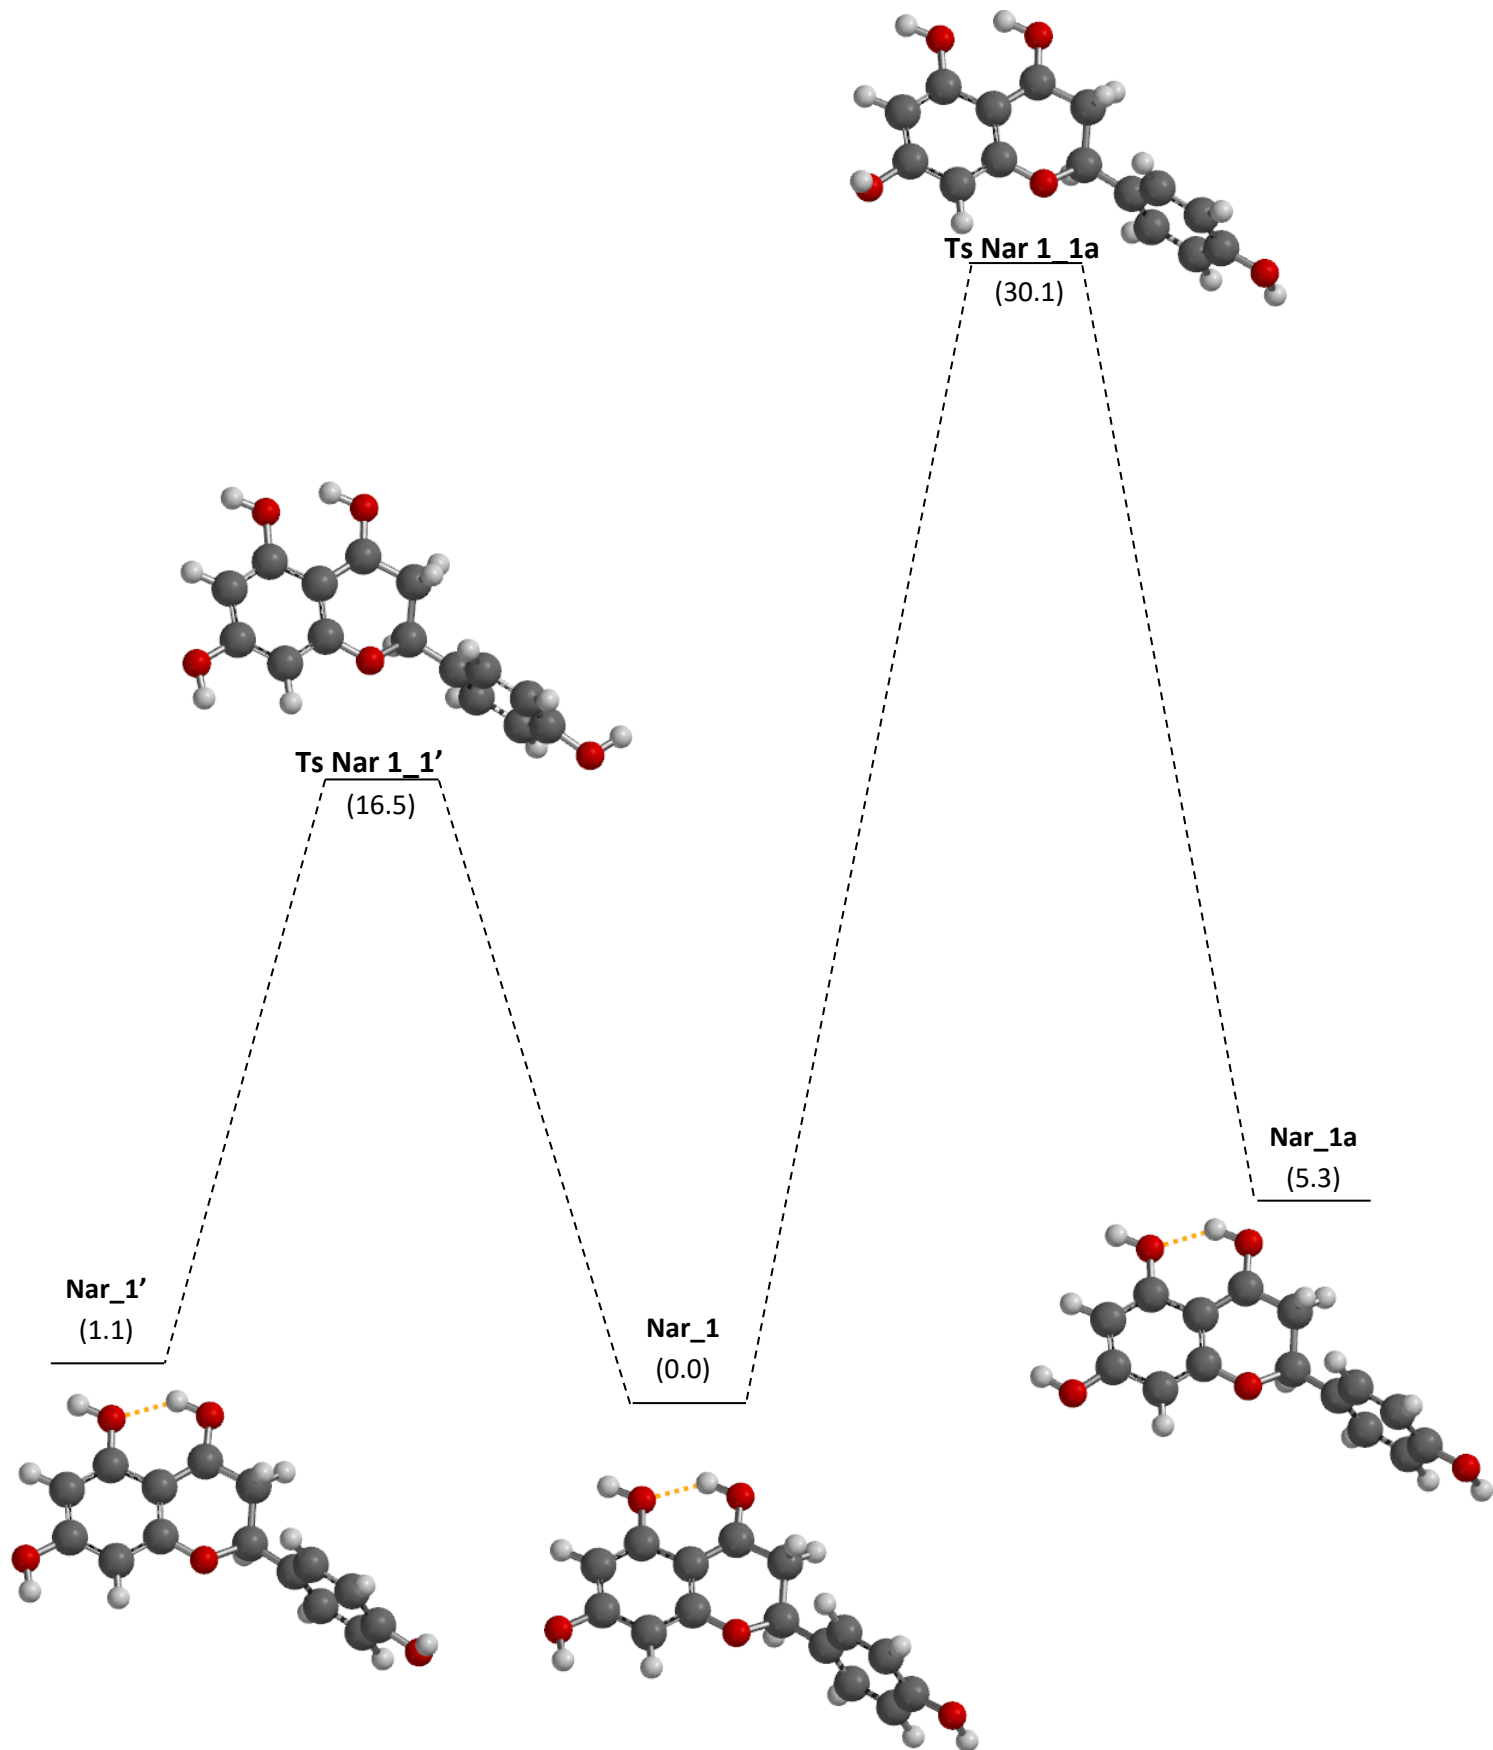

**Figure S13.** PES for the isomerization paths: **Nar\_1'**  $\longleftrightarrow$  **Nar\_1**  $\longleftrightarrow$  **Nar\_1a**. Geometries of the optimized structures and the transition state are computed at the B3LYP/6-311++G(d,p) level. Relative free energies (in parenthesis) are given in  $\text{kJ mol}^{-1}$ .

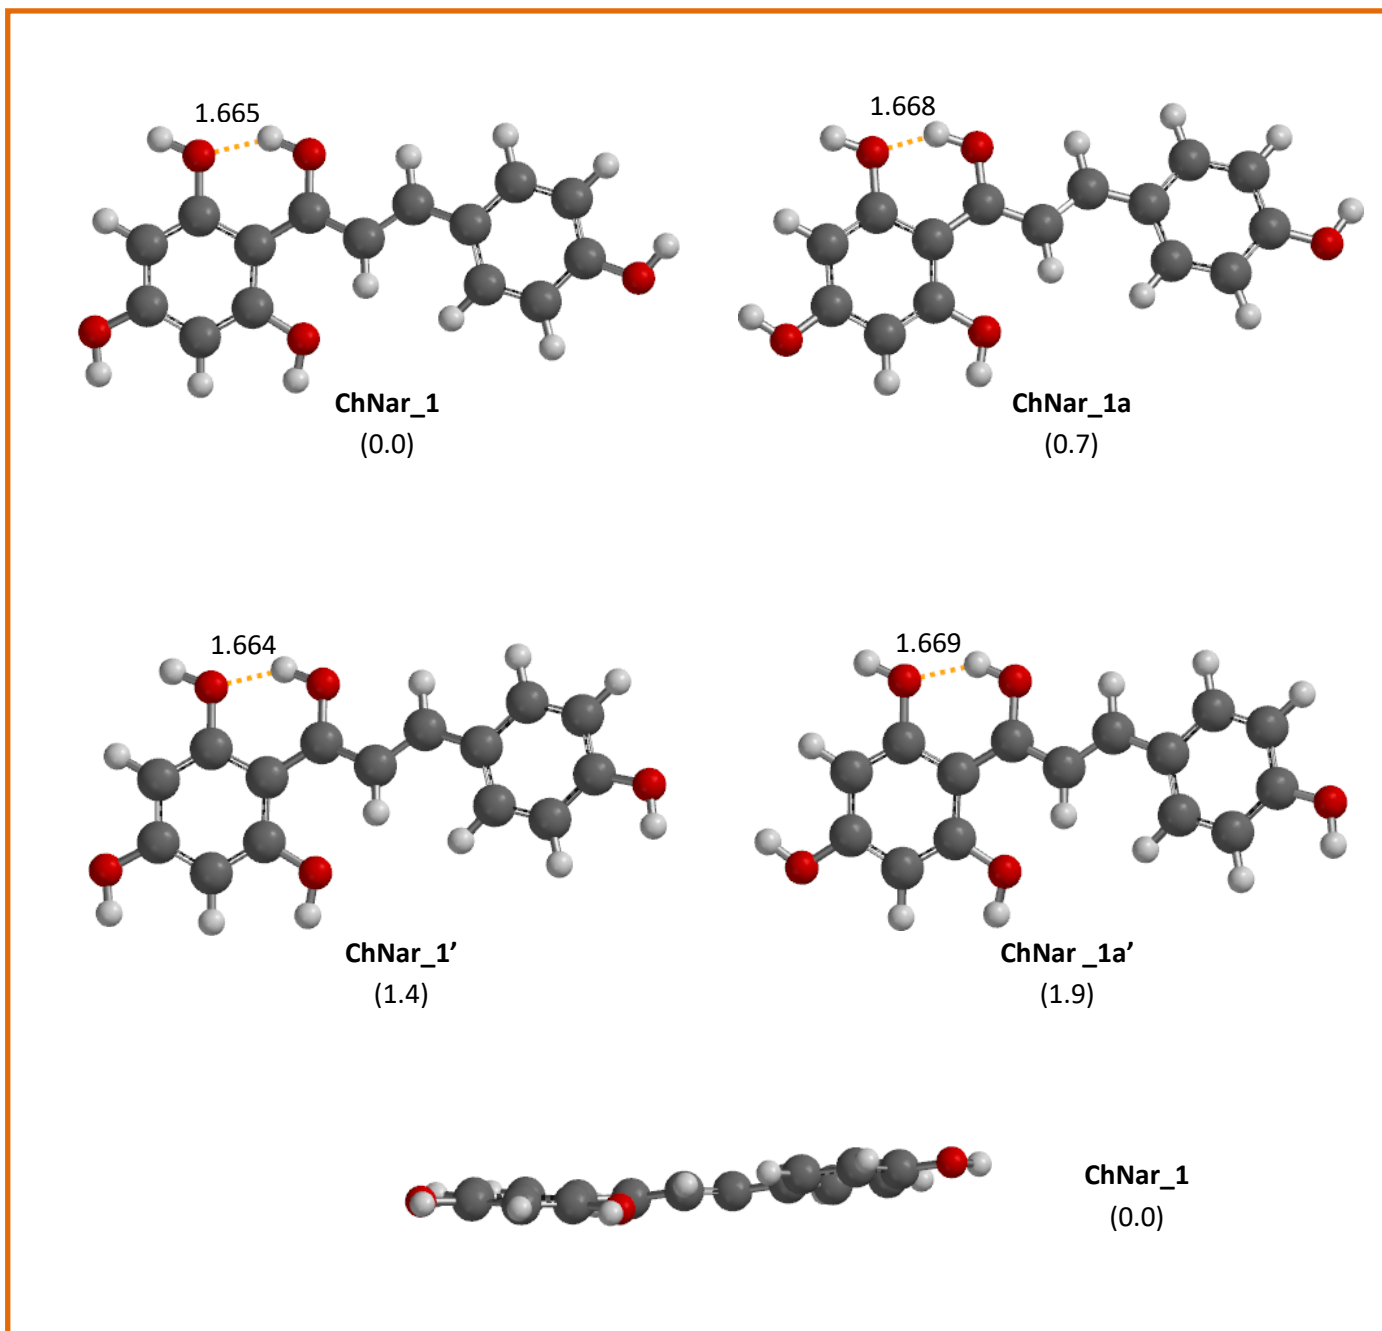

**Figure S14.** Optimized geometries and relative free energies ( $\text{kJ mol}^{-1}$ , in parenthesis) of conformers in *s-cis* configuration, belonging to the **ChNar\_1** family, calculated at the B3LYP/6-311++G(d,p) level of theory. The relative free energies are calculated with respect to the global minimum **ChNar\_1**. Distances are given in Å.

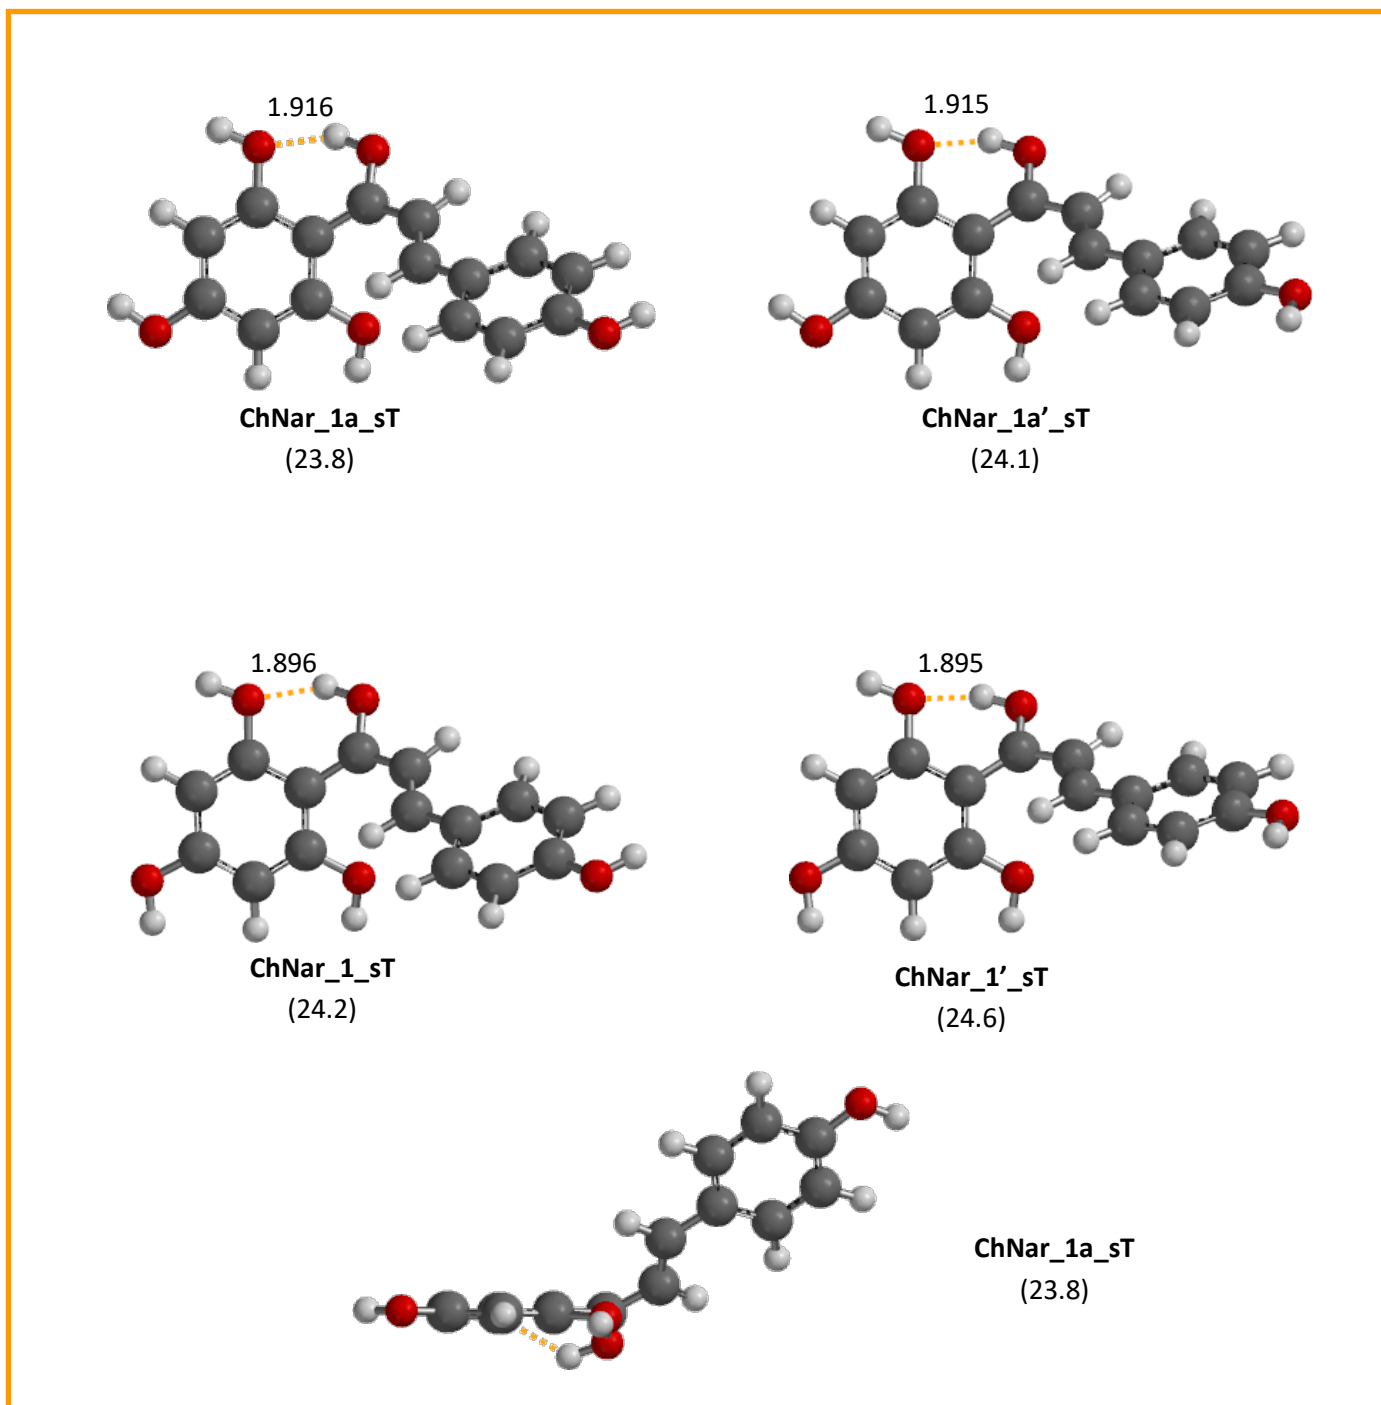

**Figure S15.** Optimized geometries and relative free energies ( $\text{kJ mol}^{-1}$ , in parenthesis) of conformers in *s-trans* configuration, belonging to the **ChNar\_1** family, calculated at the B3LYP/6-311++G(d,p) level of theory. The relative free energies are calculated with respect to the global minimum **ChNar\_1**. Distances are given in  $\text{\AA}$ .

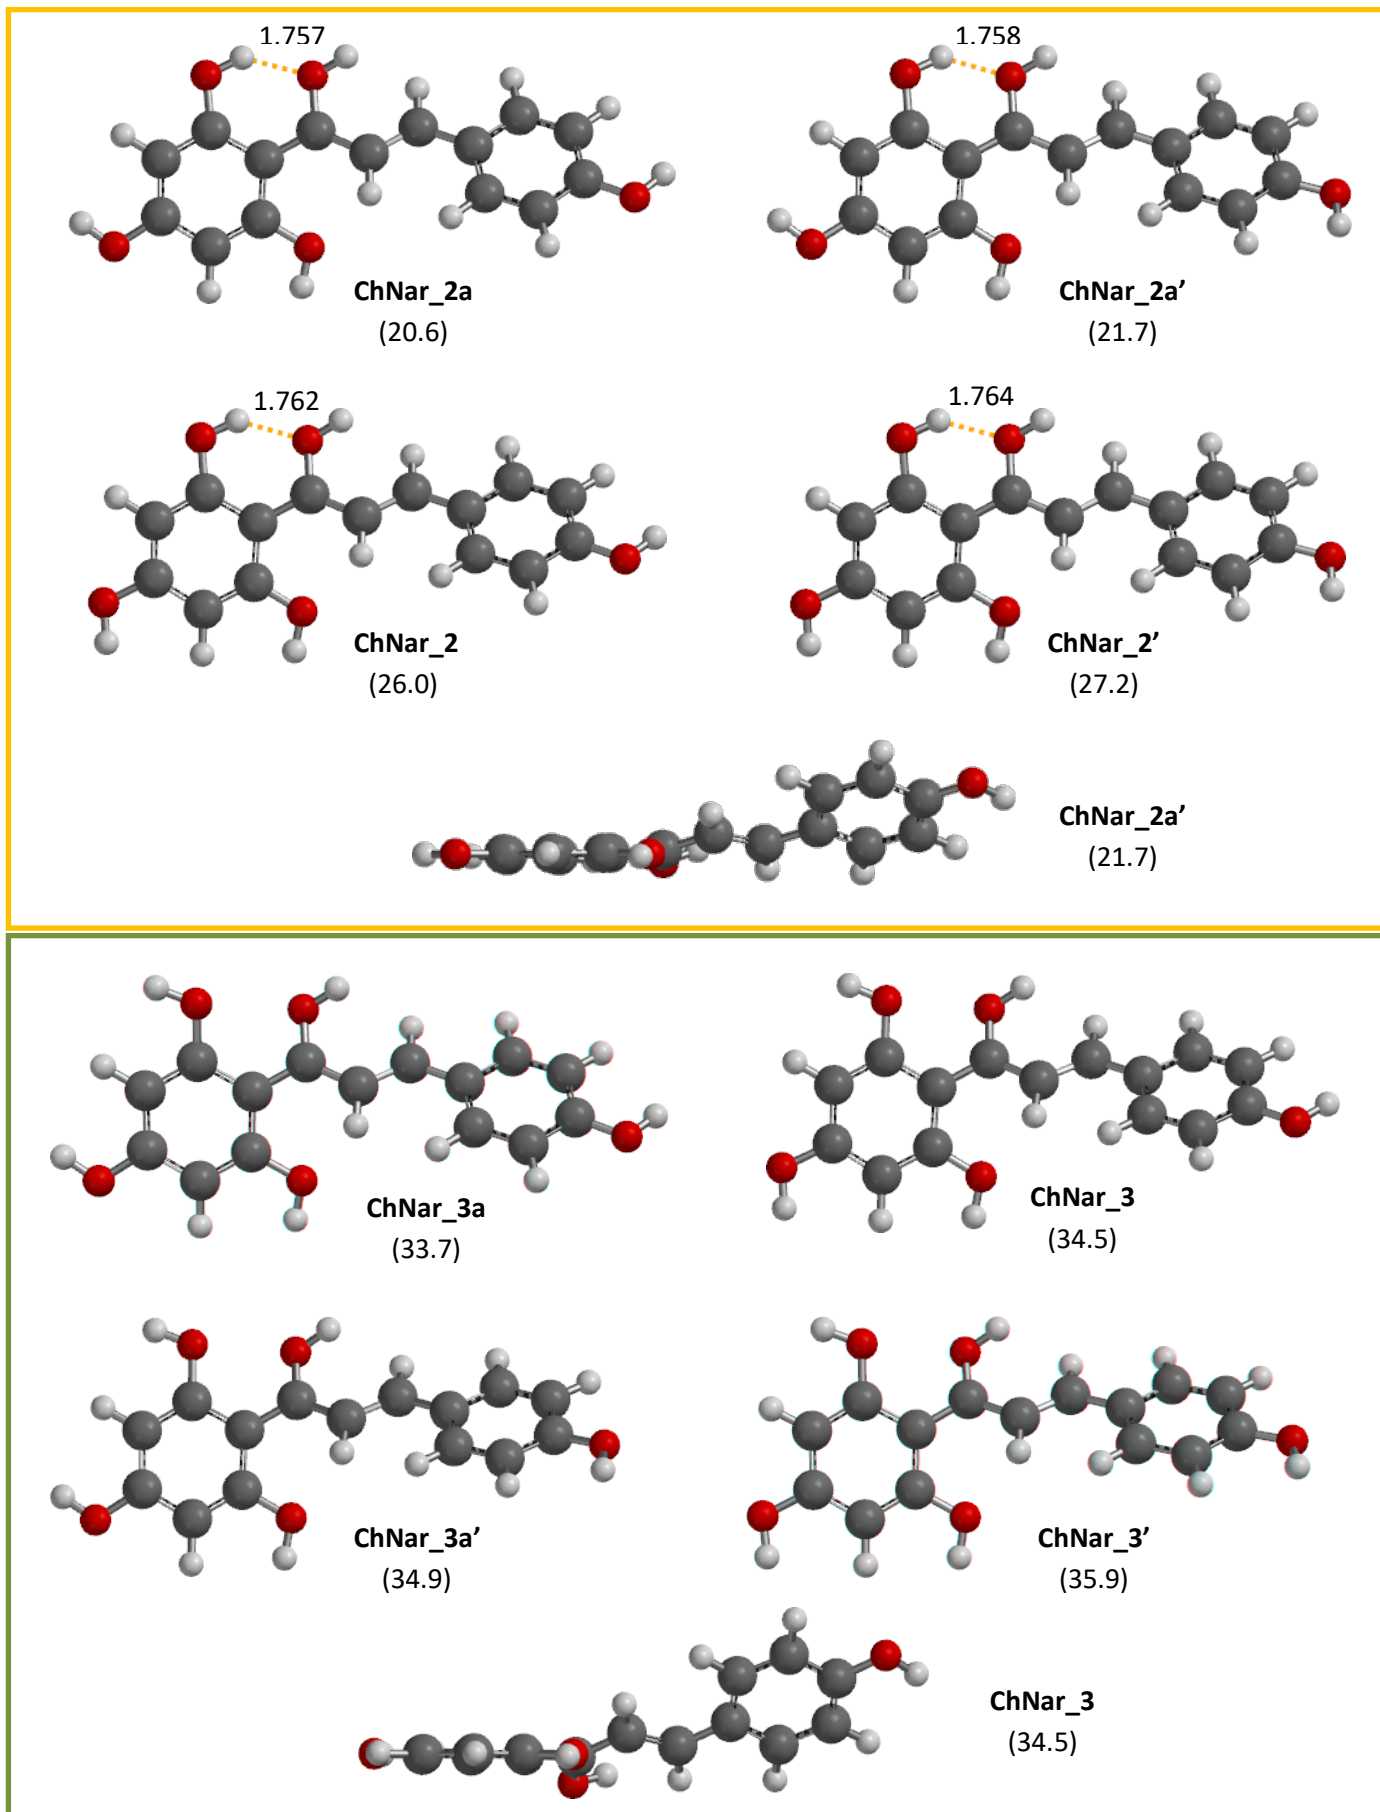

**Figure S16.** Optimized geometries and relative free energies (kJ mol<sup>-1</sup>, in parenthesis) of conformers in *s\_cis* configuration, belonging to the **ChNar\_2** (upper yellow panel) and **ChNar\_3** (lower, green panel) families, calculated at the B3LYP/6-311++G(d,p) level of theory. The relative free energies are calculated with respect to the global minimum **ChNar\_1**. Distances are given in Å.



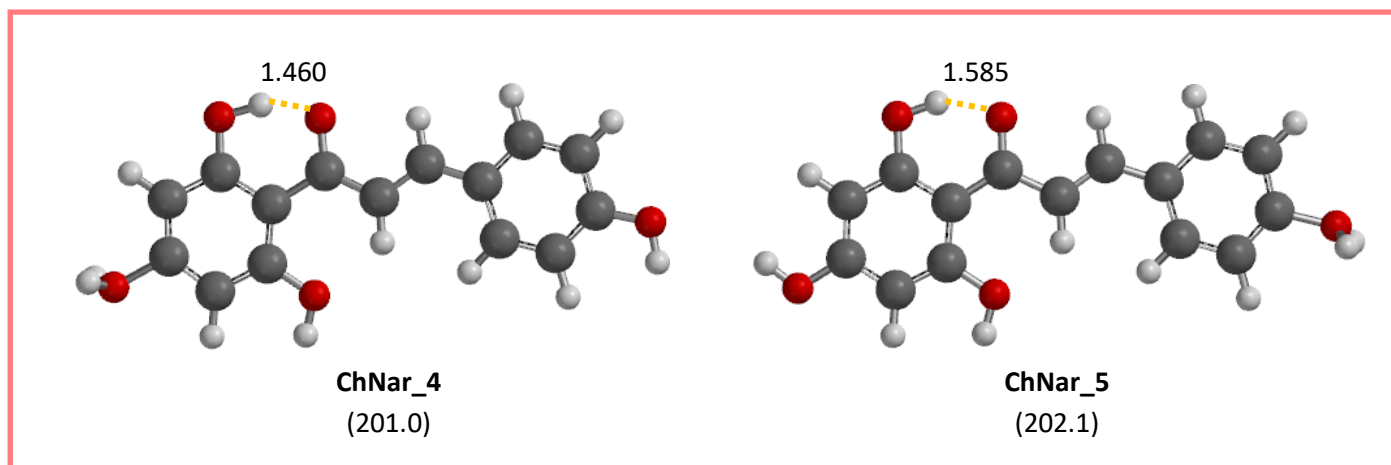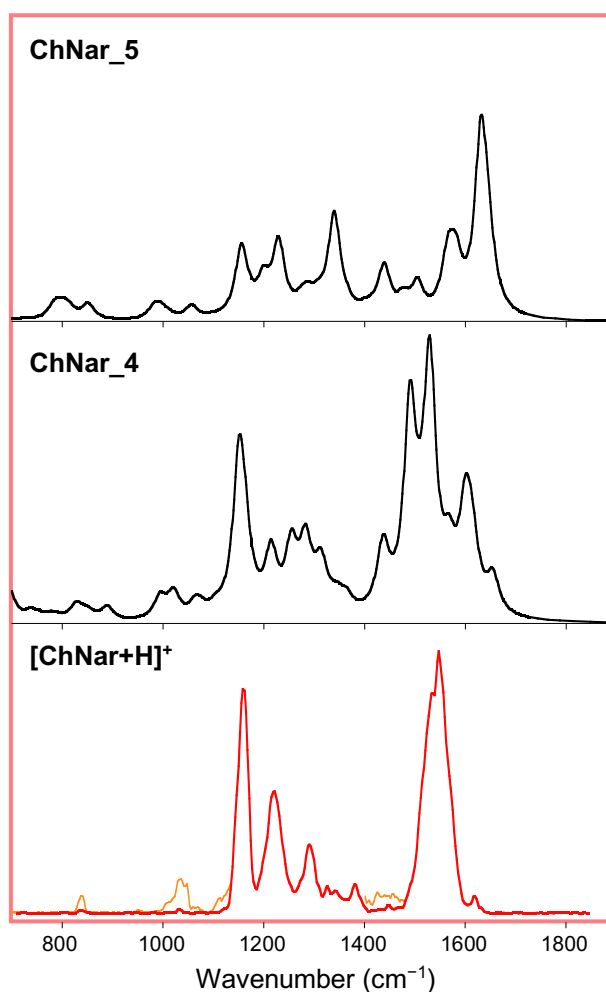

**Figure S17.** Experimental IRMPD spectrum of [ChNar+H]<sup>+</sup> (red profile) compared to the calculated IR spectra (black profiles) of representative isomers of naringenin chalcone protonated on 4'-OH (**ChNar\_5**) or 4-OH (**ChNar\_6**) position, whose optimized geometries are shown on the upper panel. Optimized geometries and IR calculated spectra are computed at the B3LYP/6-311++G(d,p) level of theory. The relative free energies (kJ mol<sup>-1</sup>) with respect to the global minimum **ChNar\_1** are reported in parenthesis. Distances are given in Å. Calculated IR intensities (y-axis) are reported in the same scale (0-1500 Km mol<sup>-1</sup>)

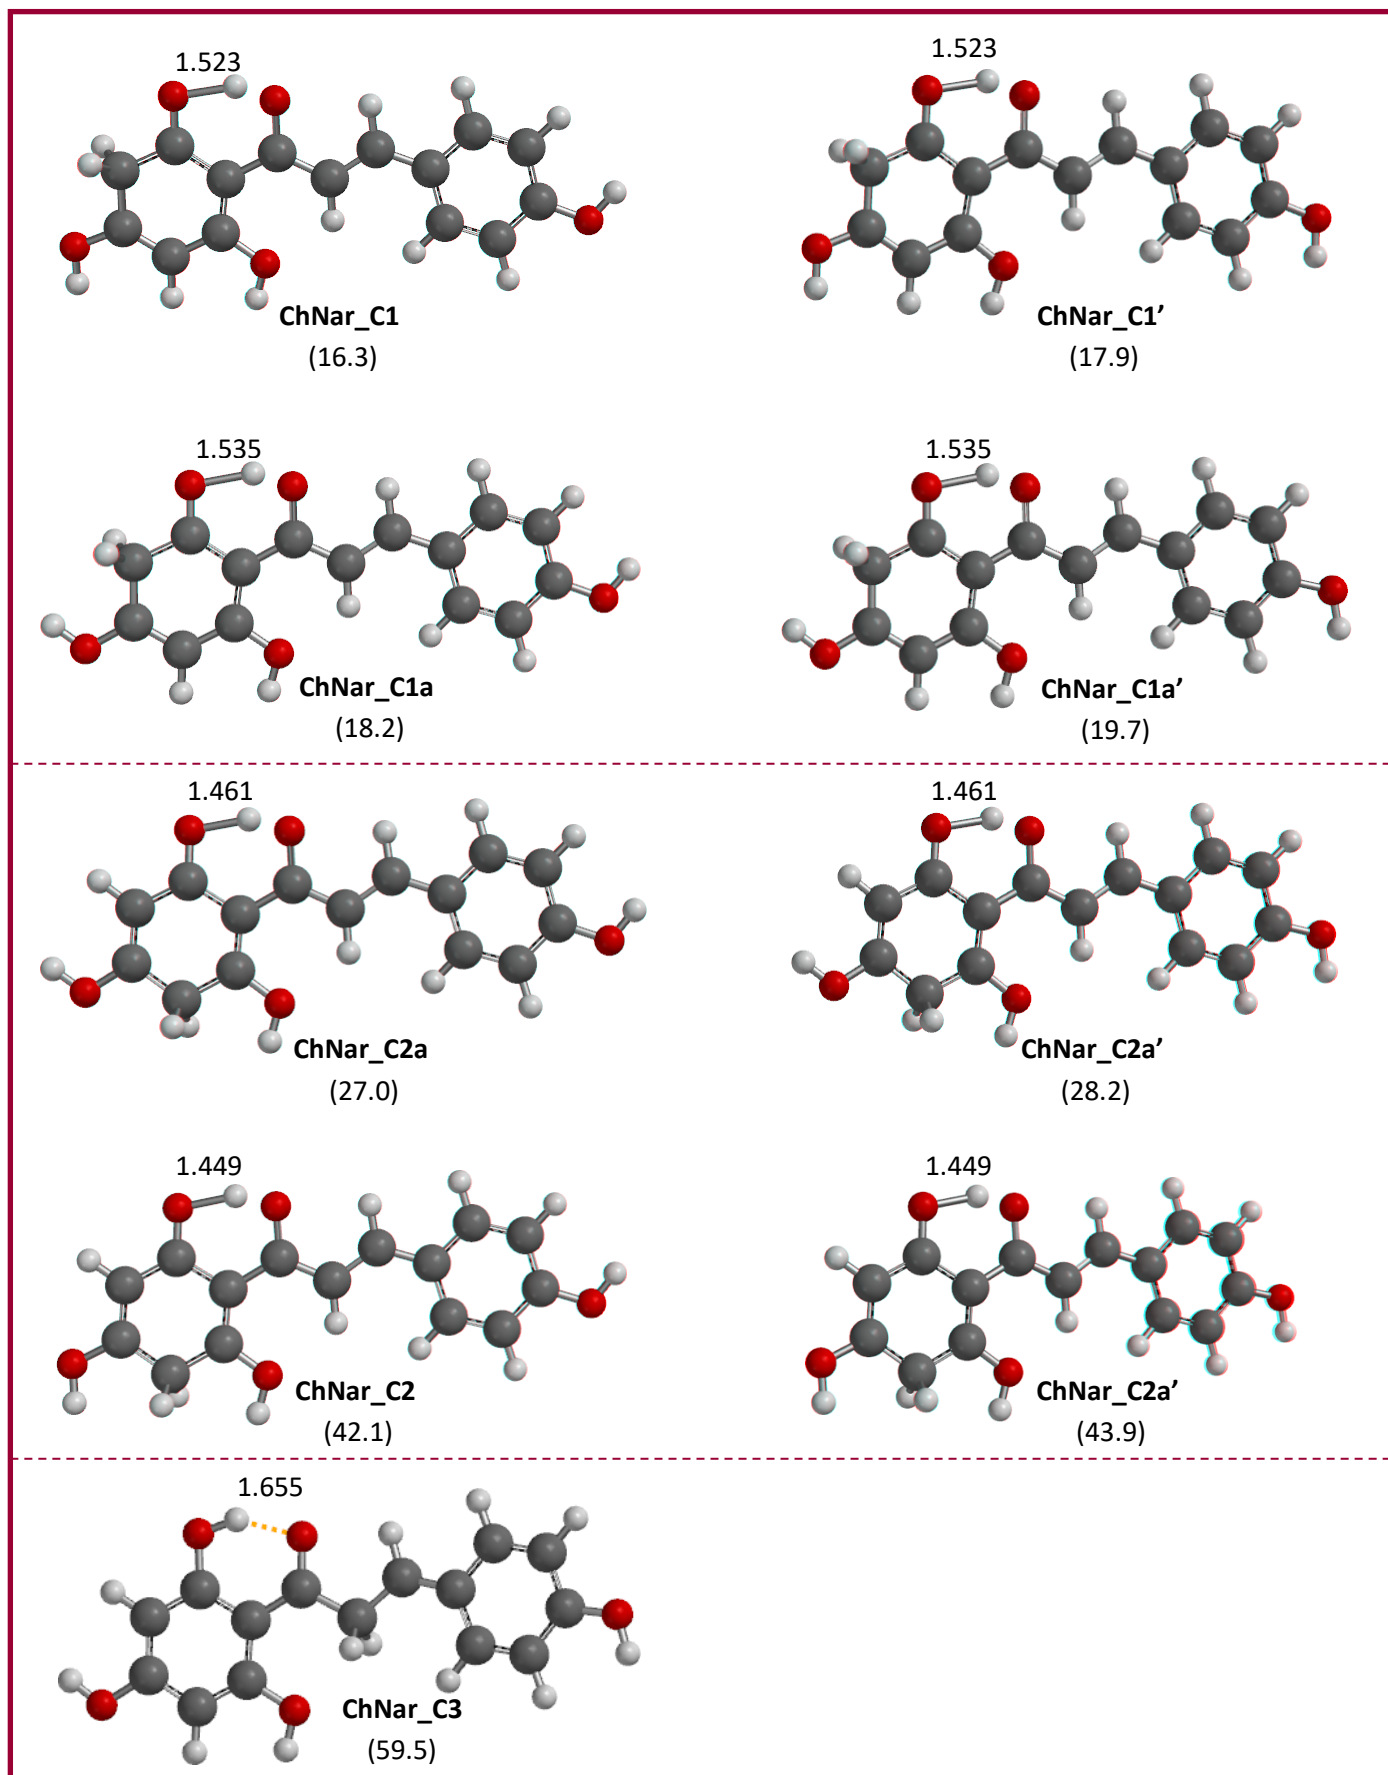

**Figure S18.** Optimized geometries and relative free energies (kJ mol<sup>-1</sup>, in parenthesis) of conformers, belonging to the **ChNar\_C1** (upper panel, protonated in C3') and **ChNar\_C2** (lower panel, protonated in C5') families, and a representative conformer protonated in C<sub>α</sub> **ChNar\_C3** calculated at the B3LYP/6-311++G(d,p) level of theory. The relative free energies are calculated with respect to the global minimum **ChNar\_1**. Distances are given in Å.

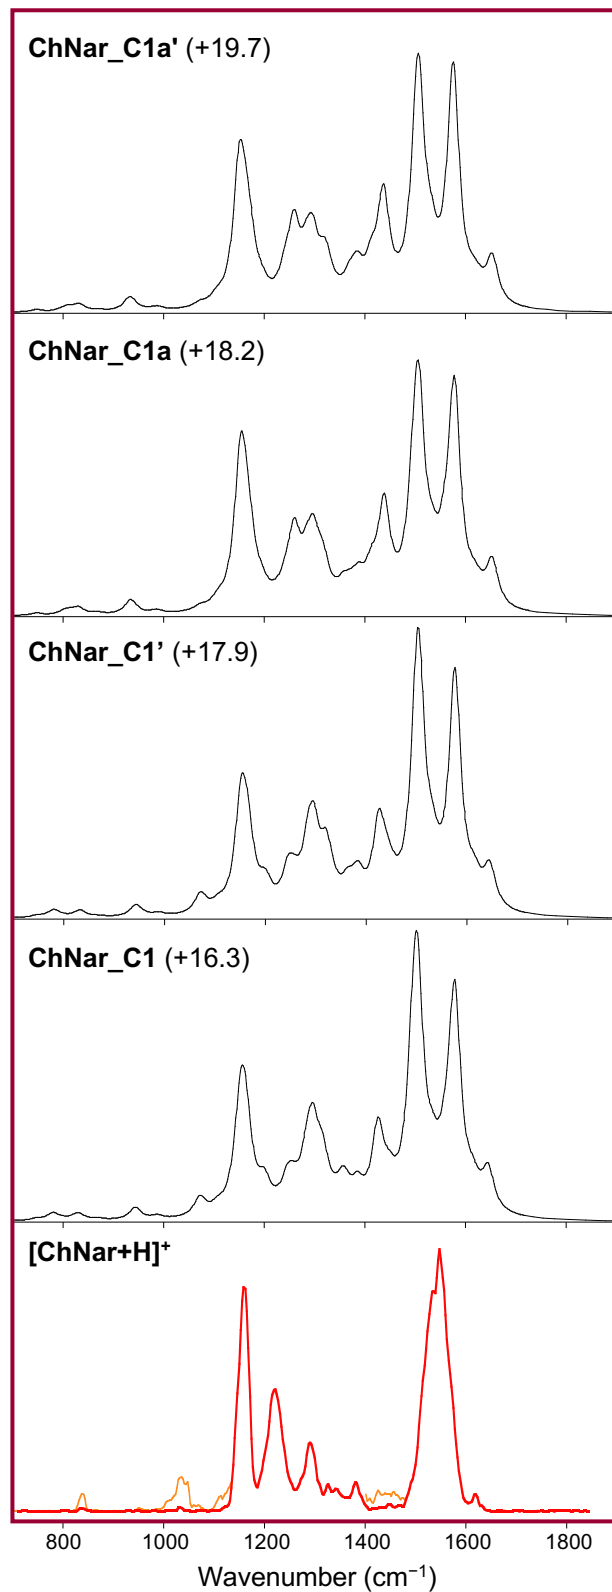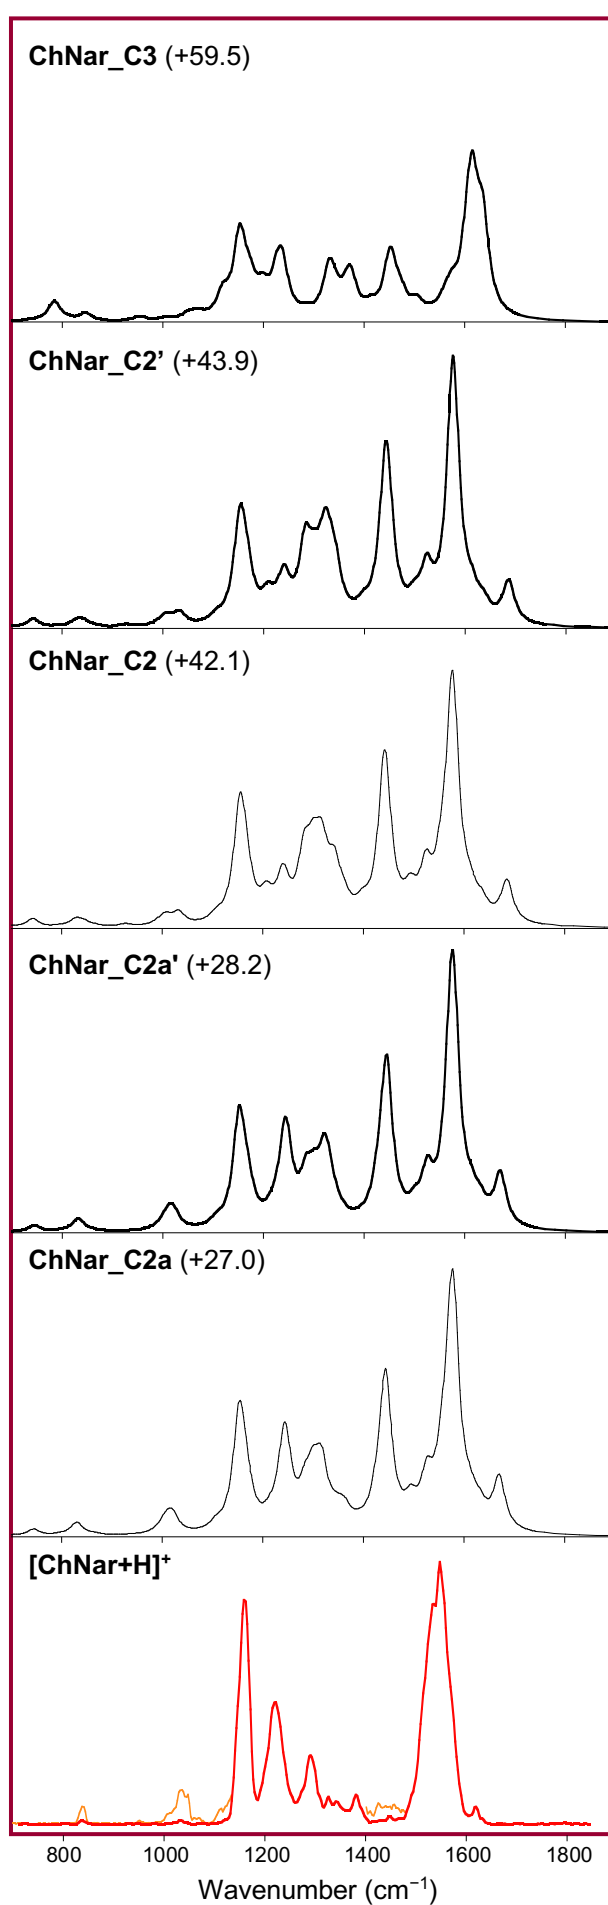

**Figure S19.** IRMPD spectrum (red profile) compared to the calculated IR spectra (black profiles) isomer of naringenin chalcone protonated in C3', in C5' or in C $\alpha$  position. Free energies relative to **ChNar\_1**, are reported in parenthesis (kJ mol<sup>-1</sup>). Calculated IR intensities (y-axis) are plotted in the same scale (0-2500 Km mol<sup>-1</sup>)

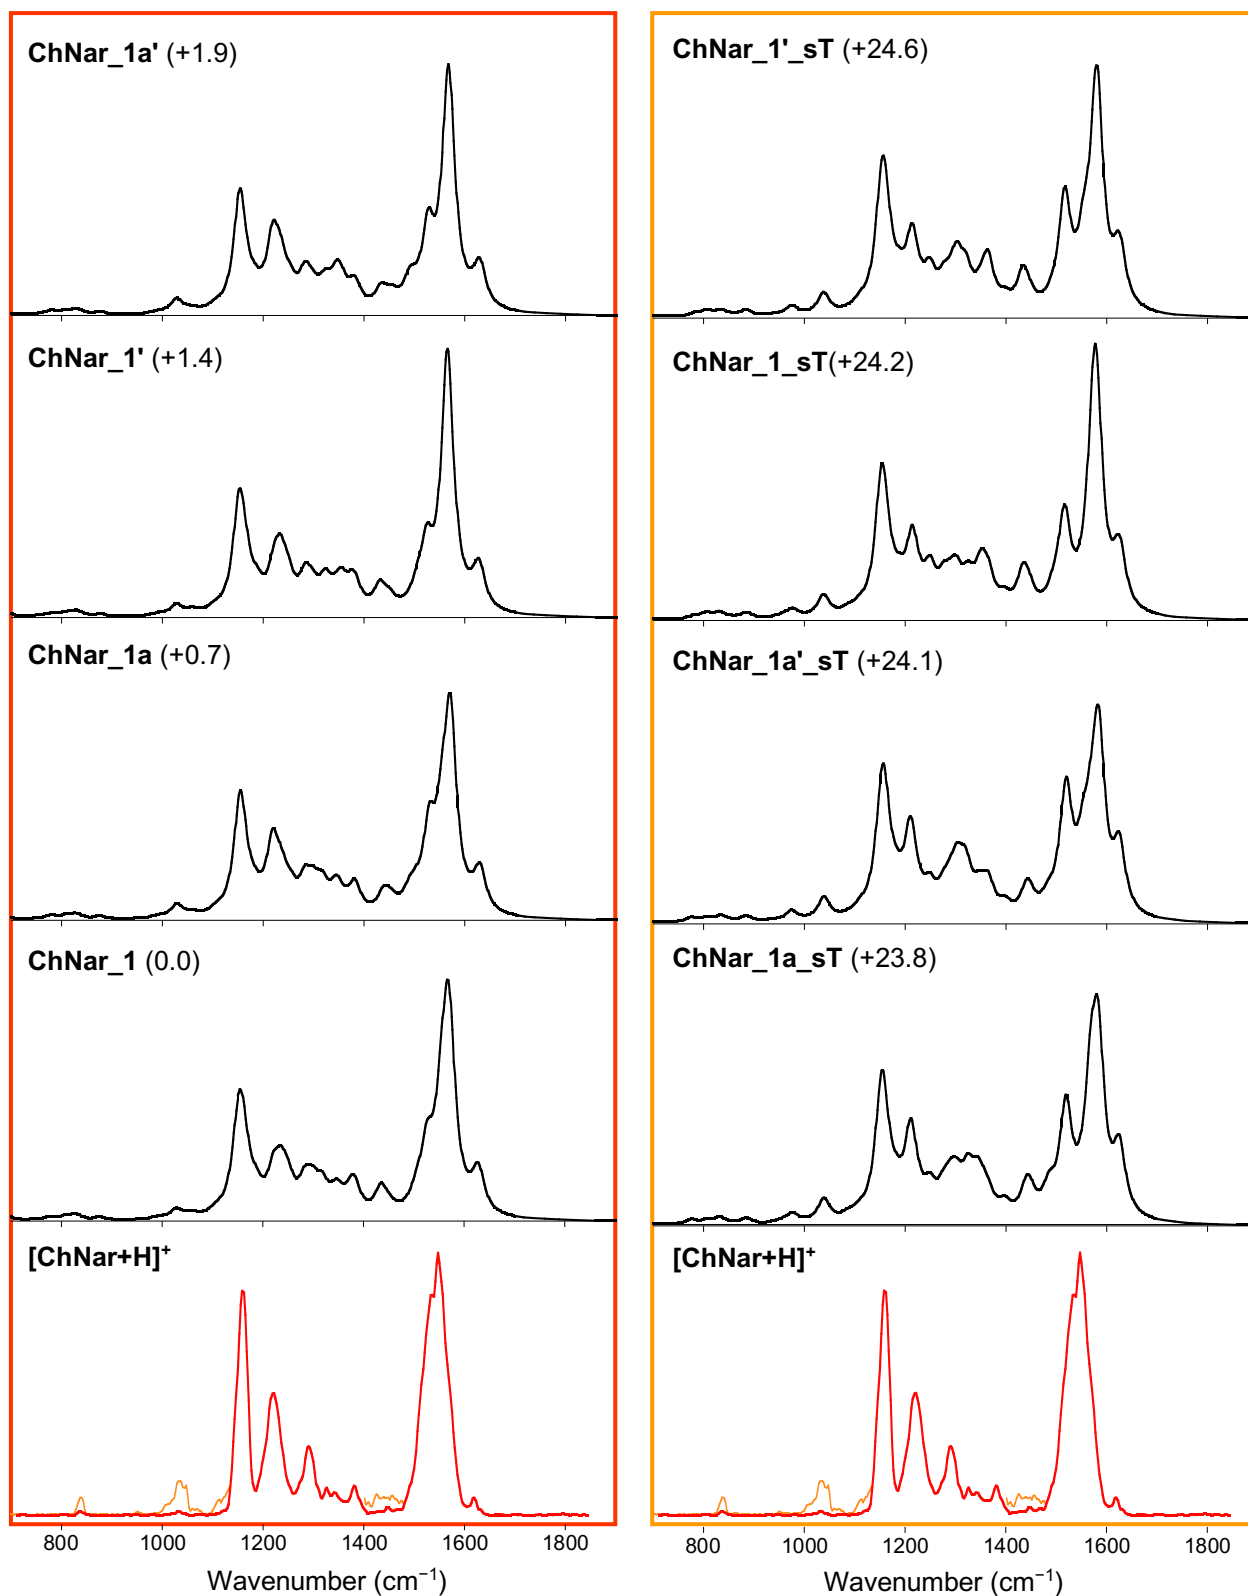

**Figure S20.** IRMPD spectrum (orange profile) compared to the calculated IR spectra (black profiles) of the four lowest lying conformers of protonated naringenin chalcone, belonging to the **ChNar\_1** family in 1) *s-cis* configuration (left, orange panel), or 2) in *s-trans* configuration (right, yellow panel) whose geometries are shown in Figure 6 and S17-18. Free energies relative to **ChNar\_1**, are reported in parenthesis ( $\text{kJ mol}^{-1}$ ). Calculated IR intensities (Y axis) are plotted in the scale: 0-3500 and 0-2500  $\text{km mol}^{-1}$  for the *s-cis* and *s-trans* conformers, respectively.

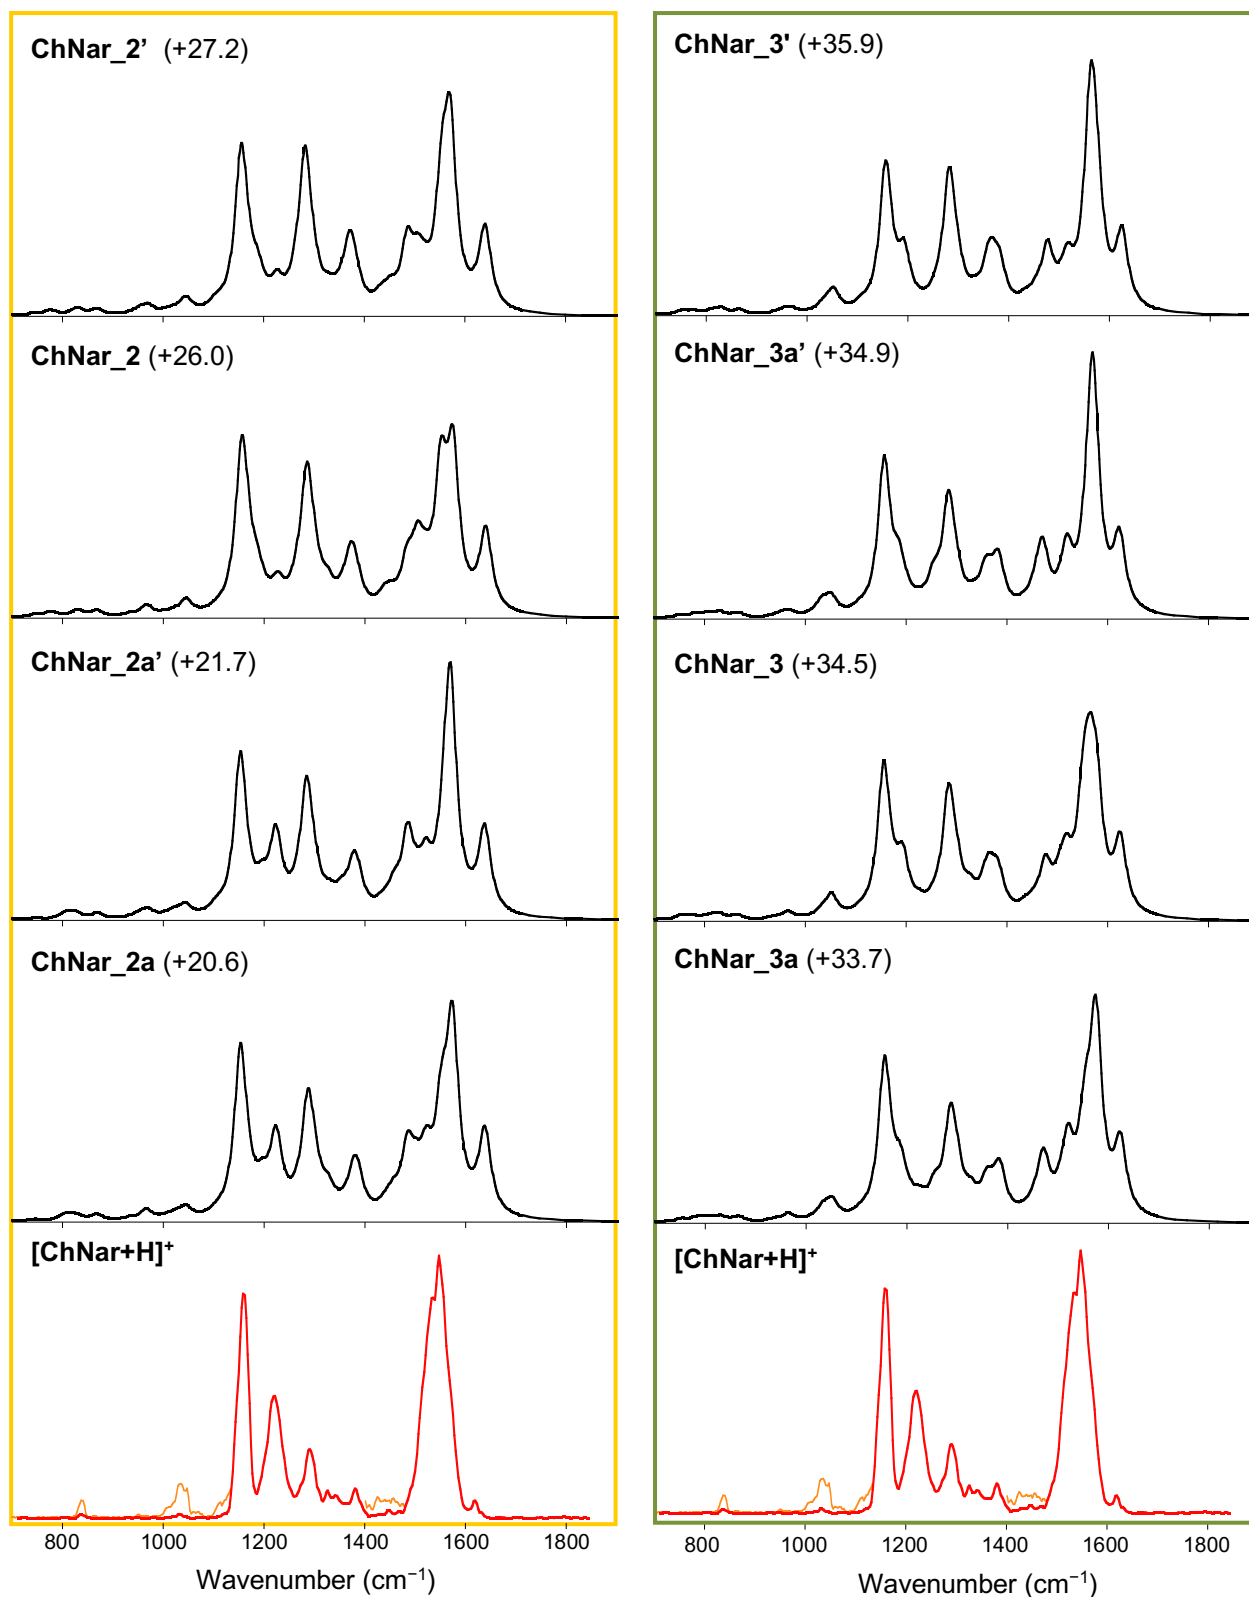

**Figure S21.** IRMPD spectrum (orange profile) compared to the calculated IR spectra (black profiles) of the four lowest lying conformers of protonated naringenin chalcone belonging to 1) the **ChNar<sub>2</sub>** family, (left, yellow panel), and 2) to the **ChNar<sub>3</sub>** family (right, green panel). Free energies relative to **Nar<sub>1</sub>**, are reported in parenthesis ( $\text{kJ mol}^{-1}$ ). Calculated IR intensities (Y axis) are plotted in the same scale ( $0\text{-}3000 \text{ Km mol}^{-1}$ )

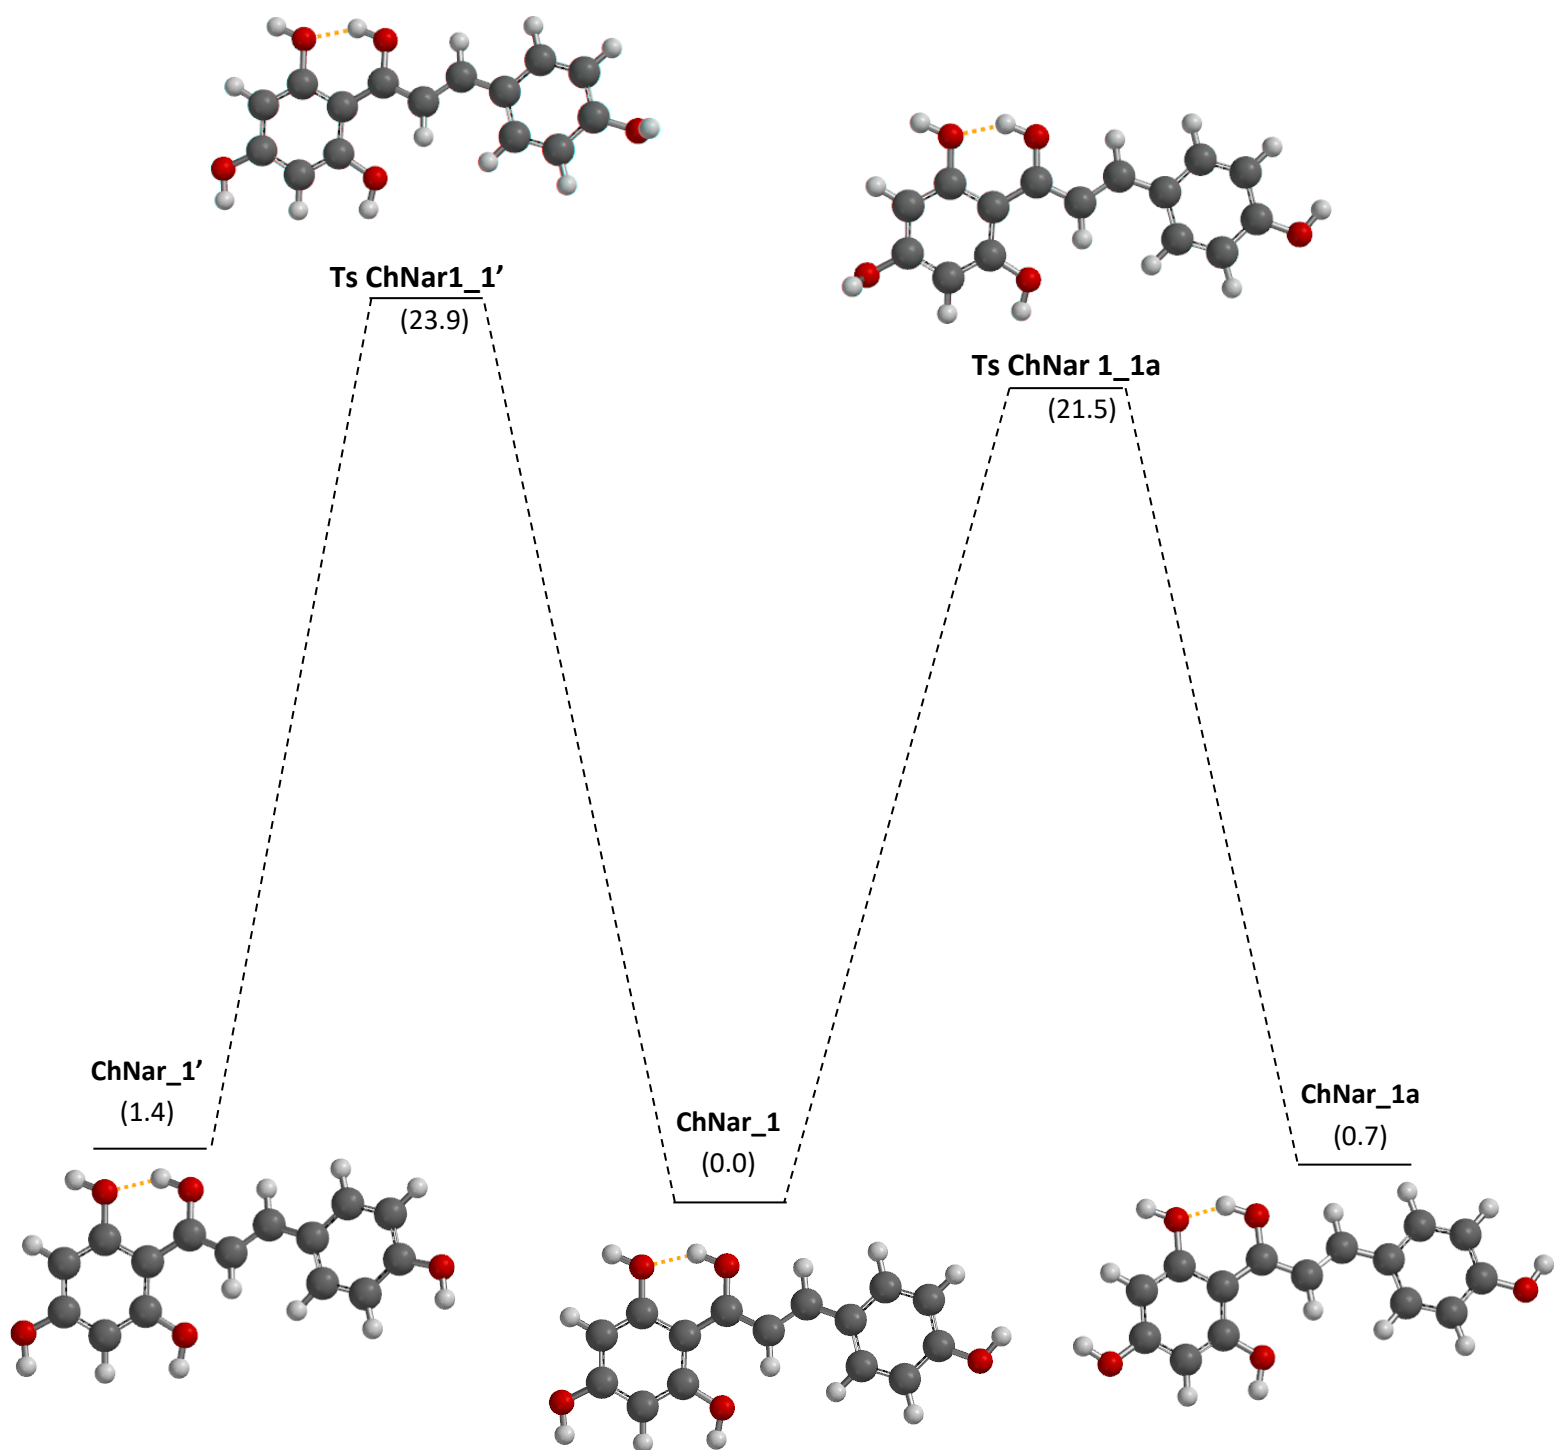

**Figure S22.** PES for the isomerization paths: **ChNar\_1'**  $\leftrightarrow$  **ChNar\_1**  $\leftrightarrow$  **ChNar\_1a**. Geometries of the optimized structures and the transition state are computed at the B3LYP/6-311++G(d,p) level. Relative free energies (in parenthesis) are given in  $\text{kJ mol}^{-1}$ .

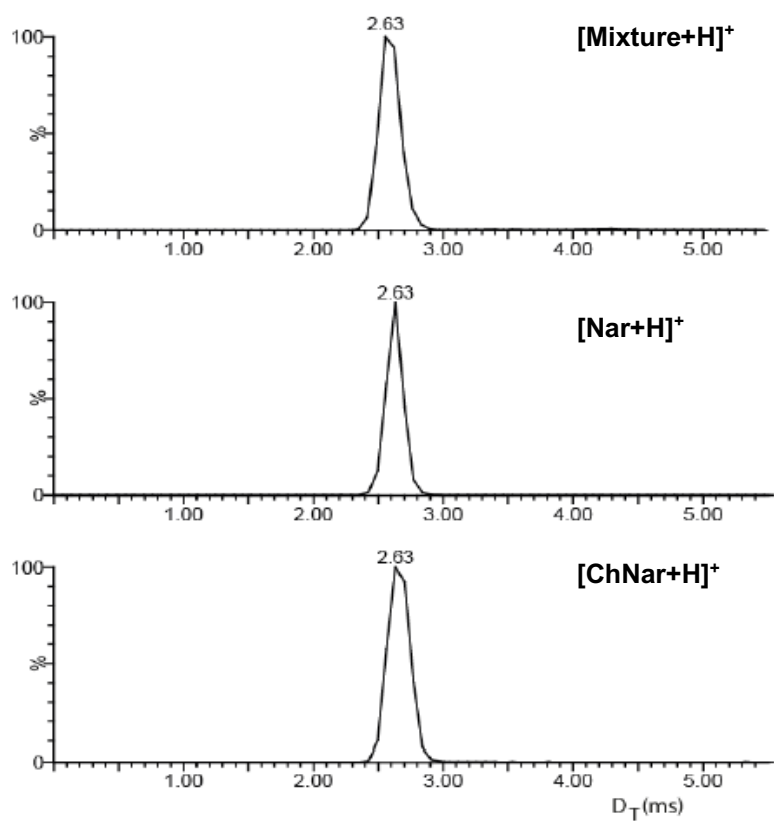

**Figure S23.** Extracted mobilogram of different protonated species observed at  $m/z$  273

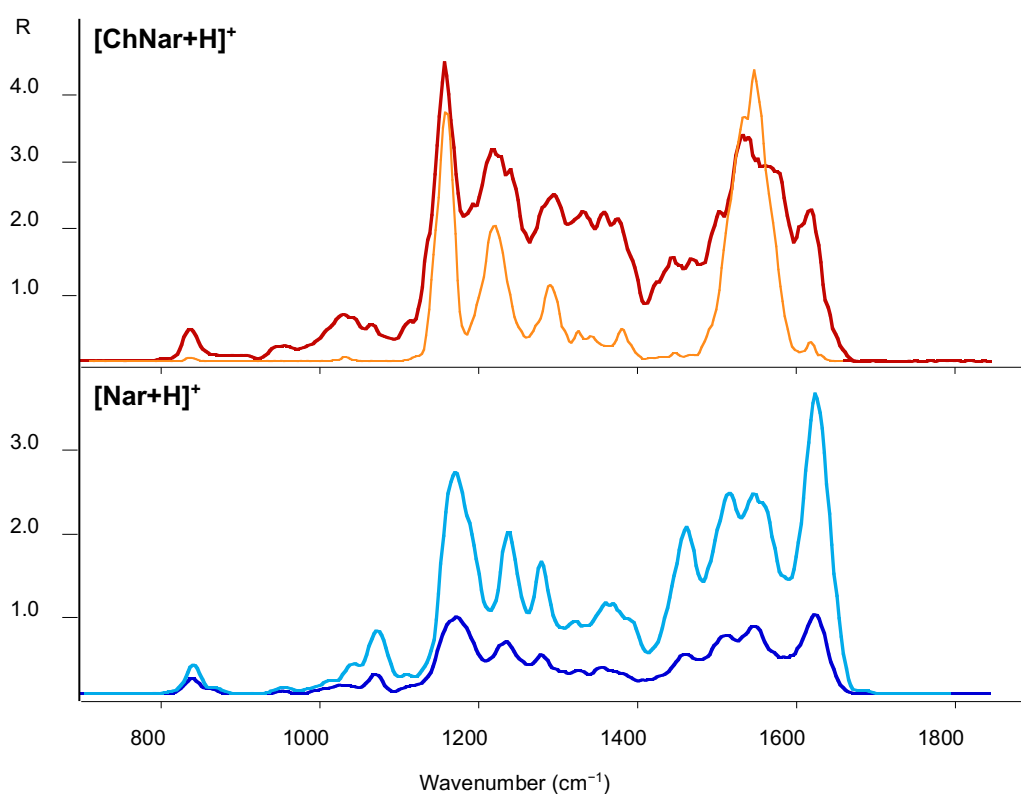

**Figure S24.** Comparison between the IRMPD spectra of mass-selected ions at  $m/z$  273 from a) standard solution of naringenin recorded at higher and lower laser energy in light blue and blue trace respectively b) standard solution of naringenin chalcone recorded at higher and lower laser energy in red and orange trace respectively



## Operating details

### Tomato and grapefruit sample preparation

Fresh red grapefruits (Star Ruby, *Citrus Paradisi*) were washed and the albedos (white part of peel) were separated from the flavedos (orange part of peel). Fresh albedos were cut in small pieces for a hot methanol extraction. In a flask, 33 mL of methanol was added to 5.00 g of fresh albedos. The mixture was heated at 60°C for 3 hours and constantly stirred with a magnetic mixer. Then, 1 µL of extraction solution was diluted with 1 mL methanol.

Tomato skin was obtained from “datterino” peel, a variety of cherry tomatoes (*Solanum lycopersicum* L.). Tomato extraction was prepared using 1.57 g of tomato skin treated with 9 mL methanol and heated at 60°C for 3 hours while constantly stirred with a magnetic mixer. Finally, 1 µL of extraction solution was diluted with 1 mL methanol.

After the extraction, the diluted solutions were directly submitted to ESI in an ion trap mass spectrometer to verify the presence of the ion at  $m/z$  273 in the natural extracts.

### CID experiments

CID experiments at variable energy were performed in a hybrid triple quadrupole linear ion trap mass spectrometer (Q1q2Q<sub>LIT</sub>) (2000 Q-Trap -Applied Biosystems). Typical ESI conditions were a flow rate of 10 µL min<sup>-1</sup>, declustering potential set to 80V, and entrance potential of 4 V. The ions of interest were first mass-selected in Q1, then collided with N<sub>2</sub> (at a nominal pressure of  $2.8 \times 10^{-5}$  mbar) in the quadrupole collision cell q2 at varying collision energies ( $E_{lab} = 4- 45$  eV) and finally the so-obtained dissociation product patterns were monitored by scanning Q<sub>LIT</sub> in normal mode operation. The breakdown curves are acquired by plotting the relative abundances of fragment ions as a function of the collision energy, converted to the center of mass frame ( $E_{CM} = [m/(m + M)]E_{lab}$ , in which  $m$  and  $M$  are the masses of the collision gas and of the ion, respectively) and the values of phenomenological threshold energies (TEs) of the various fragment ions may be obtained from linear extrapolation of the rise of these sigmoid breakdown curves to the baseline.

### Ion mobility experiments

Typical ESI conditions of the Synapt G2 HDMS quadrupole/time-of-flight mass spectrometer, were a 10 µL min<sup>-1</sup> flow rate (capillary voltage 2.27 kV, sampling cone voltage 20 V) and curtain gas (N<sub>2</sub>) flow of 100 L h<sup>-1</sup> at 35° C. Accurate mass experiments were performed using reference ions from CH<sub>3</sub>COONa external standard via LockSpray interface. IMS experiments were recorded using wave velocity of 600 m s<sup>-1</sup>, wave height of 40V and helium cell gas flow of 180 mL min<sup>-1</sup>. All data analyses were carried out using the MassLynx4.1 and DriftScope 2.1 programs provided by Waters.

## IRMPD experiments

Positively charged ions generated by ESI were mass-isolated in the cell of an Amazon Speed ETD mass spectrometer prior to irradiation with 1 macropulse from FELIX operated at a repetition rate of 10 Hz. Each pulse has an energy of 20 to 160 mJ and bandwidth of 0.5% of the center frequency. The IRMPD spectrum is obtained by plotting the photofragmentation yield  $R$  ( $R = -\ln[1 - \frac{\sum I(\text{fragment ions})}{\sum I(\text{all ions})}]$ ) as a function of the wavenumber of the IR radiation. A linear correction is applied for variations in the laser power, and the wavelength is calibrated using a grating spectrometer.

## Computational Details

The lowest energy conformations of candidate isomers of the sampled  $[\text{Nar}+\text{H}]^+$  and  $[\text{ChNar}+\text{H}]^+$  ions are obtained adopting two different strategies. Preliminary conformational searches were performed for each protonation site using the Conformer Distribution tool, together with MMFF molecular mechanics force field. Conformers were subsequently optimized using density functional theory (DFT) calculations at the B3LYP/6-311++G(d,p) level. Furthermore, planar geometries for each isomer, diversified by the orientation of 7-OH and 4'-OH for Nar (or 4'-OH and 4-OH in the case of ChNar) with torsion angles H-O-C7-C8 and H-O-C4'-C3' (or H-O-C4'-C3' and H-O-C4-C3) of  $0^\circ$  and  $180^\circ$  degrees were taken as the starting point for DFT optimizations. In the case of Naringenin, DFT calculations at the B3LYP/6-311++G(d,p) level of theory were performed for S-enantiomer geometries. For ChNAr, geometry optimizations were achieved starting from (2-E)-naringenin chalcone, (with the  $\alpha,\beta$ -double bond in *trans* configuration). The IR frequencies were scaled by 0.975 as an approximate correction for anharmonicity and convoluted with a Lorentzian shape with a full width at half maximum of  $15 \text{ cm}^{-1}$  to simulate the experimental spectrum.

**Table S1.** Phenomenological threshold energies (TEs) for the energy resolved CID experiments of mass-selected [Nar+H]<sup>+</sup> and [ChNar+H]<sup>+</sup> (*m/z* 273) ions.

| Fragment ion ( <i>m/z</i> ) | TE (eV) of [Nar+H] <sup>+</sup> | TE (eV) of [ChNar+H] <sup>+</sup> |
|-----------------------------|---------------------------------|-----------------------------------|
| 153                         | 1.00                            | 1.15                              |
| 147                         | 0.70                            | 1.00                              |
| 119                         | 2.30                            | 2.50                              |
| 91                          | 3.30                            | 3.60                              |

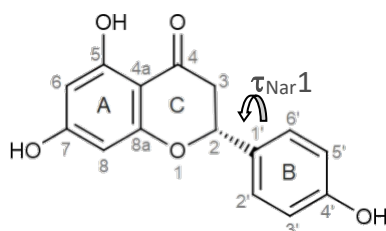

**Table S2.** Relative free energies, torsional angles and intramolecular H-bond length values of the isomers and conformers of protonated naringenin optimized in gas phase at B3LYP/6-311++G(d,p) level of theory.

| Structure   | A                                     |                        |                        | B                      |                      |
|-------------|---------------------------------------|------------------------|------------------------|------------------------|----------------------|
|             | $\Delta G$<br>(kJ mol <sup>-1</sup> ) | $\tau_{\text{Nar}1^a}$ | $\tau_{\text{Nar}2^b}$ | $\tau_{\text{Nar}3^c}$ | H-bond length<br>(Å) |
| Nar_1       | 0.0                                   | 56.83°                 | -179.80°               | 179.91°                | 1.791 (d)            |
| Nar_1'      | 1.1                                   | 56.79°                 | -179.89°               | 0.27°                  | 1.792 (d)            |
| Nar_1a      | 5.3                                   | 57.26°                 | 0.35°                  | 179.68°                | 1.796 (d)            |
| Nar_1a'     | 6.3                                   | 57.47°                 | 0.50°                  | 0.49°                  | 1.796 (d)            |
| Ts Nar 1_1' | 16.50                                 | 59.71°                 | -179.81°               | -92.54                 | 1.783 (d)            |
| Ts Nar 1-1a | 30.1                                  | 55.67°                 | -90.46                 | 179.68°                | 1.792 (d)            |
| Nar_1'_Ax   | 8.8                                   | -172.02°               | -179,95°               | 1.31°                  | 1.786 (d)            |
| Nar_1_Ax    | 10.0                                  | -174.71°               | -179,90°               | 178.02°                | 1.786 (d)            |
| Nar_1a'_Ax  | 13.8                                  | -174.05°               | -0.07°                 | 0.98°                  | 1.791 (d)            |
| Nar_1a_Ax   | 15.2                                  | -176.30°               | -0.11°                 | 177.88°                | 1.790 (d)            |
| Nar_C1a     | 9.6                                   | 50.31°                 | -0.35°                 | -179.57°               | 1.652 (e)            |
| Nar_C1a'    | 10.1                                  | 49.13°                 | -0.30°                 | 0.03°                  | 1.651(e)             |
| Nar_C1      | 19.9                                  | 50.18°                 | 179.55°                | -179.35°               | 1.661 (e)            |
| Nar_C1'     | 20.5                                  | 48.81°                 | 179.57°                | -0.08°                 | 1.661 (e)            |
| Nar_C2      | 10.3                                  | 51.31°                 | 179.88°                | -179.54°               | 1.644 (e)            |
| Nar_C2'     | 11.10                                 | 50.66°                 | 179.89°                | 0.02°                  | 1.645 (e)            |
| Nar_C2a     | 18.9                                  | 51.41°                 | -0.08°                 | -179.82°               | 1.641 (e)            |
| Nar_C2a'    | 19.7                                  | 51.04°                 | -0.32°                 | 0.25°                  | 1.641(e)             |
| Nar_2a      | 25.0                                  | 59.08°                 | 0.34°                  | 179.00°                | 1.878 (e)            |
| Nar_2       | 25.6                                  | 58.35°                 | -179.72°               | 179.26°                | 1.883 (e)            |
| Nar_2a'     | 25.9                                  | 60.27°                 | 0.45°                  | 0.87°                  | 1.878 (e)            |
| Nar_2'      | 26.7                                  | 59.76°                 | -179.81°               | 0.65°                  | 1.883 (e)            |
| Nar_3       | 28.4                                  | 58.14°                 | -179.96°               | 179.39°                | -                    |
| Nar_3'      | 29.5                                  | 59.14°                 | 179.95 °               | 0.56°                  | -                    |
| Nar_3a      | 31.7                                  | 58.45°                 | 0.05°                  | 179.17°                | -                    |
| Nar_3a'     | 32.7                                  | 59.53°                 | 0.18°                  | 0.71°                  | -                    |
| Nar_4       | 169.6                                 | 55.54°                 | -                      | -0.40°                 | 1.705 (d)            |
| Nar_5       | 172.1                                 | 103.33°                | -179.83°               | -                      | 1.755 (d)            |

- a) dihedral angle formed by C3-C2-C1'-C2' atoms  
b) dihedral angle formed by C6-C7-O(7)-H(7) atoms  
c) dihedral angle formed by C3'-C4'-O(4')-H(4') atoms  
d) between OH(4) and O(5)  
e) between OH(5) and O(4)

**Table S3.** CO bond length values of the isomers and conformers of protonated naringenin optimized in gas phase at B3LYP/6-311++G(d,p) level of theory (the computed IR position for C-O vibrational stretching mode are in parenthesis)

| Structure   | C4-O length<br>(Å)                      | C5-O length<br>(Å)                      | C7-O length<br>(Å)                      | C4'-O length<br>(Å)            |
|-------------|-----------------------------------------|-----------------------------------------|-----------------------------------------|--------------------------------|
| Nar_1       | 1.305 (1504 cm <sup>-1</sup> )          | 1.360 (1225 cm <sup>-1</sup> )          | 1.332 (1459 cm <sup>-1</sup> )          | 1.355 (1275 cm <sup>-1</sup> ) |
| Nar_1'      | 1.305                                   | 1.360                                   | 1.332                                   | 1.355                          |
| Nar_1a      | 1.305                                   | 1.360                                   | 1.333                                   | 1.355                          |
| Nar_1a'     | 1.305                                   | 1.360                                   | 1.333                                   | 1.355                          |
| Ts Nar 1_1' | 1.304                                   | 1.360                                   | 1.332                                   | 1.377                          |
| Ts Nar 1-1a | 1.301                                   | 1.361                                   | 1.358                                   | 1.354                          |
| Nar_1'_Ax   | 1.306 (1503 cm <sup>-1</sup> )          | 1.361 (1227 cm <sup>-1</sup> )          | 1.333 (1460 cm <sup>-1</sup> )          | 1.354 (1275 cm <sup>-1</sup> ) |
| Nar_1_Ax    | 1.306                                   | 1.361                                   | 1.333                                   | 1.354                          |
| Nar_1a'_Ax  | 1.306                                   | 1.361                                   | 1.334                                   | 1.355                          |
| Nar_1°_Ax   | 1.306                                   | 1.361                                   | 1.333                                   | 1.355                          |
| Nar_C1a     | 1.228 (1675 cm <sup>-1</sup> )          | 1.298 (1476 cm <sup>-1</sup> )          | 1.325 (1423 cm <sup>-1</sup> )          | 1.353 (1279 cm <sup>-1</sup> ) |
| Nar_C1a'    | 1.228                                   | 1.298                                   | 1.325                                   | 1.353                          |
| Nar_C1      | 1.227                                   | 1.298                                   | 1.327                                   | 1.353                          |
| Nar_C1'     | 1.227                                   | 1.298                                   | 1.327                                   | 1.353                          |
| Nar_C2      | 1.230 (1675 cm <sup>-1</sup> )          | 1.296 (1490 cm <sup>-1</sup> )          | 1.325 (1456 cm <sup>-1</sup> )          | 1.353 (1279 cm <sup>-1</sup> ) |
| Nar_C2'     | 1.230                                   | 1.296                                   | 1.325                                   | 1.353                          |
| Nar_C2a     | 1.230                                   | 1.297                                   | 1.327                                   | 1.353                          |
| Nar_C2a'    | 1.230                                   | 1.297                                   | 1.237                                   | 1.353                          |
| Nar_2a      | 1.335 (1344 and 1490 cm <sup>-1</sup> ) | 1.332 (1490 cm <sup>-1</sup> )          | 1.329 (1448 cm <sup>-1</sup> )          | 1.354 (1275 cm <sup>-1</sup> ) |
| Nar_2       | 1.334                                   | 1.333                                   | 1.333                                   | 1.354                          |
| Nar_2a'     | 1.335                                   | 1.332                                   | 1.329                                   | 1.355                          |
| Nar_2'      | 1.334                                   | 1.333                                   | 1.330                                   | 1.354                          |
| Nar_3       | 1.314 (1488 and 1357 cm <sup>-1</sup> ) | 1.337 (1488 cm <sup>-1</sup> )          | 1.332 (1455 cm <sup>-1</sup> )          | 1.355 (1275 cm <sup>-1</sup> ) |
| Nar_3'      | 1.314                                   | 1.337                                   | 1.332                                   | 1.355                          |
| Nar_3a      | 1.314                                   | 1.336                                   | 1.332                                   | 1.355                          |
| Nar_3a'     | 1.314                                   | 1.337                                   | 1.332                                   | 1.355                          |
| Nar_4       | 1.227 (1675 cm <sup>-1</sup> )          | 1.322 (1446 and 1361 cm <sup>-1</sup> ) | 1.512 (865 cm <sup>-1</sup> )           | 1.357 (1269 cm <sup>-1</sup> ) |
| Nar_5       | 1.233 (1664 and 1633 cm <sup>-1</sup> ) | 1.333 (1452 and 1313 cm <sup>-1</sup> ) | 1.352 (1483 and 1313 cm <sup>-1</sup> ) | 1.507 (735 cm <sup>-1</sup> )  |

**Table S4.** Computational data associated with the various structures considered.

| Structure   | E<br>(Hartree) | ZPE<br>(kJ mol <sup>-1</sup> ) | Enthalpy Corr.<br>298 K<br>(kJ mol <sup>-1</sup> ) | H-TS<br>298 K<br>(kJ mol <sup>-1</sup> ) | Relative<br>$\Delta H$ (298 K)<br>(kJ mol <sup>-1</sup> ) | Relative<br>$\Delta G$ 298 K<br>(kJ mol <sup>-1</sup> ) |
|-------------|----------------|--------------------------------|----------------------------------------------------|------------------------------------------|-----------------------------------------------------------|---------------------------------------------------------|
| Nar_1       | -955.581919    | 673.4087                       | 713.6921                                           | 568.0628                                 | 0.0                                                       | 0.0                                                     |
| Nar_1'      | -955.581661    | 673.7368                       | 713.9211                                           | 568.4712                                 | 0.9                                                       | 1.1                                                     |
| Nar_1a      | -955.579708    | 672.9764                       | 713.4047                                           | 567.5268                                 | 5.5                                                       | 5.3                                                     |
| Nar_1a'     | -955.579462    | 673.2714                       | 713.6096                                           | 567.8944                                 | 6.4                                                       | 6.3                                                     |
| Nar_1'_Ax   | -955.579250    | 674.3070                       | 714.4814                                           | 569.8682                                 | 7.8                                                       | 8.8                                                     |
| Nar_1_Ax    | -955.579039    | 674.7843                       | 714.8398                                           | 570.4631                                 | 8.7                                                       | 10.0                                                    |
| Nar_1a'_Ax  | -955.577219    | 674.0807                       | 714.3812                                           | 569.5808                                 | 13.0                                                      | 13.9                                                    |
| Nar_1a_Ax   | -955.576862    | 674.4208                       | 714.6523                                           | 569.9891                                 | 14.2                                                      | 15.2                                                    |
| Nar_2a      | -955.572005    | 672.5388                       | 713.0750                                           | 567.0291                                 | 25.4                                                      | 25.0                                                    |
| Nar_2       | -955.571749    | 672.7364                       | 713.2129                                           | 567.2723                                 | 26.2                                                      | 25.9                                                    |
| Nar_2a'     | -955.571725    | 672.4159                       | 713.0011                                           | 566.8721                                 | 26.1                                                      | 25.6                                                    |
| Nar_2'      | -955.571392    | 672.6352                       | 713.1495                                           | 567.1474                                 | 27.1                                                      | 26.7                                                    |
| Nar_3       | -955.570734    | 672.6426                       | 713.1950                                           | 567.0725                                 | 28.9                                                      | 28.4                                                    |
| Nar_3'      | -955.570405    | 672.8664                       | 713.3495                                           | 567.3559                                 | 29.9                                                      | 29.5                                                    |
| Nar_3a      | -955.569310    | 672.3299                       | 712.9661                                           | 566.7067                                 | 32.4                                                      | 31.7                                                    |
| Nar_3a'     | -955.569060    | 672.5814                       | 713.1452                                           | 567.0176                                 | 33.2                                                      | 32.7                                                    |
| Nar_4       | -955.514911    | 668.0051                       | 708.8994                                           | 561.8114                                 | 171.1                                                     | 169.6                                                   |
| Nar_5       | -955.514335    | 669.0717                       | 709.9908                                           | 562.7896                                 | 173.7                                                     | 172.1                                                   |
| Nar_C1a     | -955.577223    | 670.8016                       | 710.5192                                           | 565.3585                                 | 9.2                                                       | 9.6                                                     |
| Nar_C1a'    | -955.576948    | 670.5764                       | 710.3625                                           | 565.0773                                 | 9.7                                                       | 10.1                                                    |
| Nar_C1      | -955.572898    | 669.9862                       | 710.0385                                           | 564.3196                                 | 20.0                                                      | 19.9                                                    |
| Nar_C1'     | -955.572570    | 669.7924                       | 709.9049                                           | 564.0752                                 | 20.8                                                      | 20.6                                                    |
| Nar_C2      | -955.576723    | 670.1815                       | 709.9753                                           | 564.7073                                 | 9.9                                                       | 10.3                                                    |
| Nar_C2'     | -955.576391    | 670.1483                       | 709.9601                                           | 564.6562                                 | 10.8                                                      | 11.1                                                    |
| Nar_C2a     | -955.573031    | 669.3093                       | 709.3883                                           | 563.6254                                 | 19.0                                                      | 18.9                                                    |
| Nar_C2a'    | -955.572714    | 669.3016                       | 709.3850                                           | 563.6118                                 | 19.9                                                      | 19.7                                                    |
| Ts Nar 1_1' | -955.574409    | 670.9346                       | 711.4879                                           | 564.8655                                 | 17.5                                                      | 16.5                                                    |
| Ts Nar1_1a  | -955.568526    | 669.2640                       | 710.1464                                           | 562.9841                                 | 31.6                                                      | 30.1                                                    |

**Table S5.** Positions of the IRMPD bands of protonated Naringenin, [Nar+H]<sup>+</sup>, and computed vibrational modes for the lowest-energy **Nar\_1**

| Wavenumber (cm <sup>-1</sup> ) |                                 | Vibrational mode <sup>[b]</sup>                               |
|--------------------------------|---------------------------------|---------------------------------------------------------------|
| IRMPD                          | Calculated <sup>[a]</sup>       |                                                               |
| 840                            | 815 (53)                        | βC6H oop                                                      |
|                                | 819 (53)                        | βC8H oop                                                      |
|                                | 827 (59)                        | βC H oop (C2', C3' and C8)                                    |
| 867                            | 861 (63)                        | σ CC breathing (B ring)                                       |
| 950                            | 942 (23)                        | Rock CH2                                                      |
| 1013-1040                      | 1023 (78)                       | σ CC breathing (C ring)                                       |
| 1070                           | 1069 (196)                      | σ C5-OH + σ O1-C8a + σ CC breathing (A ring)                  |
| 1106                           | 1107 (22)                       | β H ip (B ring)                                               |
| 1170                           | 1152 (131)                      | β H ip (A ring)                                               |
|                                | 1157 (313)                      | β OH (C4')                                                    |
|                                | 1168 (49)                       | β H ip (B ring)                                               |
|                                | 1177 (42)                       | Twist CH2 (C3) + β CH                                         |
|                                | 1193 (182)                      | σ C7-OH + β OH (C5) + Twist CH2 (C3) + β CH ip (A and C ring) |
| 1240                           | 1212 (52)                       | Twist CH2 (C3) + σ C3-C1'                                     |
|                                | 1225 (234)                      | σ C4-OH + β OH (C7) + σ C5-OH + β H ip (A ring)               |
|                                | 1250 (88)                       | Wag CH2 (C3) + β CH (C2)                                      |
| 1280                           | 1275 (144)                      | σ C4'-OH + β CH ip (B ring)                                   |
|                                | 1285 (54)                       | β OH (C4 and C5) + β CH ip                                    |
| 1316                           | 1306 (132)                      | β OH (C4) + β CH ip (C and B ring)                            |
|                                | 1321 (46)                       | β CH (C2 and C3)                                              |
|                                | 1336 (42)                       | β OH (C4') + σ CC (B ring)                                    |
| 1356                           | <b>1355 (229)<sup>[c]</sup></b> | σ CC (A and C ring)+ β H ip (A and C ring)                    |
| 1390                           | 1372 (53)                       | β CH (C3)                                                     |
|                                | 1381 (104)                      | σ C4a-C8a + β CH (C2)                                         |
|                                | 1402 (69)                       | Sciss CH2 (C3)                                                |
| 1460                           | 1420 (61)                       | β OH (C4) + β CH (A and C ring) + σ CC (A and C ring)         |
|                                | 1441 (37)                       | β CH ip (B ring) + β CH (C2) + σ CC (B ring)                  |
|                                | 1459 (385)                      | σ C7-OH + β H ip (A ring) + σ CC (A ring) + σ C4-OH           |
| 1513                           | 1504 (269)                      | σ C4-OH + β H ip (A ring) + σ CC (A ring)                     |
|                                | 1512 (134)                      | σ CC (B ring)+ β C-H ip (B ring)                              |
|                                | 1536 (218)                      | σ C4-C4a + σ CC (A ring)                                      |
| 1550                           | 1557 (251)                      | σ C4-C4a + β OH ip (C4) + σ CC (A ring)                       |
| 1623                           | 1586 (33)                       | σ CC (B ring)                                                 |
|                                | 1611 (160)                      | σ CC (B ring)                                                 |
|                                | 1636 (980)                      | σ CC (A ring)                                                 |

[a]Vibrational frequencies calculated at the B3LYP/6-311++G(d,p) level of theory are scaled by a factor of 0.975. The computed intensities (km mol<sup>-1</sup>) are given in parenthesis. Bands with intensity lower than 20 km mol<sup>-1</sup> are not reported.

[b] β = bending; σ = stretching; oop = out-of-plane; ip= in-plane; Rock= rocking; Twist = twisting; Wag = wagging; the numbering of the atoms follows Figure 1.

[c] this calculated IR feature belongs of **Nar\_1a** conformer

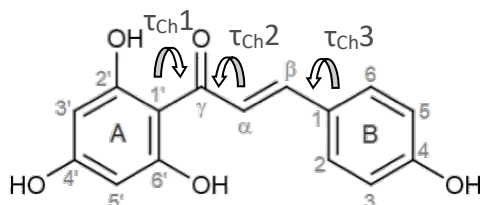

**Table S6.** Relative free energies, torsional angles and intramolecular H bond length values of the isomers and conformers of protonated naringenin chalcone optimized at B3LYP/6-311++G(d,p) level of theory.

| Structure    | $\Delta G$<br>(kJ mol <sup>-1</sup> ) | $\tau_{Ch1}^a$ | $\tau_{Ch2}^b$ | $\tau_{Ch3}^c$ | $\tau_{Ch4}^d$ | $\tau_{Ch5}^e$ | H bond length (Å) |
|--------------|---------------------------------------|----------------|----------------|----------------|----------------|----------------|-------------------|
| ChNar_1      | 0.0                                   | -10.19°        | -1.85°         | 0.18°          | 179.95°        | 179.87°        | 1.665 (f)         |
| ChNar_1a     | 0.7                                   | -9.96°         | -1.51°         | 0.48°          | -0.11°         | 179.85°        | 1.668 (f)         |
| ChNar_1'     | 1.4                                   | -10.28°        | -1.67°         | 0.31°          | 179.87°        | -0.23°         | 1.664 (f)         |
| ChNar_1a'    | 1.9                                   | -10.21°        | -1.40°         | 0.59°          | -0.13°         | -0.19°         | 1.669 (f)         |
| ChNar_1a_sT  | 23.8                                  | -33.93°        | 160.57°        | 173.13°        | -0.42°         | -179.95°       | 1.916 (f)         |
| ChNar_1a'_sT | 24.1                                  | -33.80°        | 160.57°        | 174.13°        | -0.27°         | 0.04°          | 1.916 (f)         |
| ChNar_1_sT   | 24.2                                  | -33.21°        | 159.93°        | 174.00°        | 179.26°        | -179.86°       | 1.896 (f)         |
| ChNar_1'_sT  | 24.6                                  | -33.08°        | 159.92°        | 174.00°        | 179.18°        | -0.08°         | 1.895 (f)         |
| ChNar_2a     | 20.6                                  | -14.98°        | -17.07°        | -5.79°         | -0.65°         | -179.87°       | 1.757 (g)         |
| ChNar_2a'    | 21.7                                  | -15.09°        | -17.22°        | -6.45°         | -0.53°         | 0.03°          | 1.758 (g)         |
| ChNar_2      | 26.0                                  | -15.35°        | -17.35°        | -6.03°         | 179.83°        | -179.74°       | 1.762 (g)         |
| ChNar_2'     | 27.2                                  | -15.62°        | -17.53°        | -6.78°         | 179.72°        | -0.02°         | 1.764 (g)         |
| ChNar_3a     | 33.7                                  | -27.90°        | -15.76°        | -6.22°         | 0.49°          | 179.76°        | -                 |
| ChNar_3      | 34.5                                  | -28.03°        | -15.65°        | -6.20°         | -179.72°       | 179.78°        | -                 |
| ChNar_3a'    | 34.9                                  | -27.71°        | -15.75°        | -6.38°         | 0.62°          | 0.13°          | -                 |
| ChNar_3'     | 35.9                                  | -28.19°        | -15.57°        | -6.42°         | -179.75°       | 0.04°          | -                 |
| ChNar_C1     | 16.3                                  | 179.02         | -1.14°         | 0.03°          | -179.86°       | -179.94°       | 1.523 (f)         |
| ChNar_C1'    | 17.9                                  | -0.73°         | -1.00°         | -1.31°         | -179.89°       | 0.10°          | 1.523 (f)         |
| ChNar_C1a    | 18.2                                  | -0.78°         | -1.06°         | -1.30°         | -0.30°         | -179.93°       | 1.535 (f)         |
| ChNar_C1a'   | 19.7                                  | 0.75°          | -1.06°         | -1.38°         | 0.02°          | 0.17°          | 1.535 (f)         |
| ChNar_C2a    | 26.7                                  | -0.70°         | 0.07°          | 0.83°          | -0.29°         | 179.81°        | 1.461 (f)         |
| ChNar_C2a'   | 28.2                                  | -0.52°         | 0.22°          | 0.98           | -0.23°         | 0.01°          | 1.461 (f)         |
| ChNar_C2     | 42.1                                  | 2.32°          | 0.27°          | 0.67°          | -179.44°       | 179.80°        | 1.449 (f)         |
| ChNar_C2'    | 43.9                                  | 2.14°          | 0.24°          | 0.72°          | -179.35°       | 0.05°          | 1.449 (f)         |
| ChNar_C3     | 59.529                                | -0.95°         | 2.63°          | 0.03°          | 0.20°          | 0.14°          | 1.665 (g)         |
| ChNar_4      | 201.049                               | -3.74°         | -0.13°         | 1.72°          | -              | -0.26°         | 1.460 (g)         |
| ChNar_5      | 202.129                               | 1.24°          | 0.06°          | 3.76°          | -0.11°         | -              | 1.585 (d)         |

- a) dihedral angle formed by C2'-C1'-C $\gamma$ -O( $\gamma$ ) atoms  
b) dihedral angle formed by O( $\gamma$ )-C $\gamma$ -C $\alpha$ -C $\beta$  atoms  
c) dihedral angle formed by C $\alpha$ -C $\beta$ -C1-C2 atoms  
d) dihedral angle formed by C3'-C4'-O(4')-H(4') atoms (A ring)  
e) dihedral angle formed by C3-C4-O(4)-H(4) atoms (B ring)  
f) between OH( $\gamma$ ) and O(2')  
g) between OH(2') and O( $\gamma$ )



**Table S7.** Computational data associated with the various structures considered.

| Structure     | E<br>(Hartree) | ZPE<br>(kJ<br>mol <sup>-1</sup> ) | Enthalpy Corr.<br>298 K<br>(kJ mol <sup>-1</sup> ) | H-TS<br>298 K<br>(kJ mol <sup>-1</sup> ) | Relative<br>ΔH (298 K)<br>(kJ mol <sup>-1</sup> ) | Relative ΔG<br>298 K<br>(kJ mol <sup>-1</sup> ) |
|---------------|----------------|-----------------------------------|----------------------------------------------------|------------------------------------------|---------------------------------------------------|-------------------------------------------------|
| ChNar_1       | -955.585352    | 668.6011                          | 710.9572                                           | 560.8912                                 | 0.0                                               | 0.0                                             |
| ChNar_1a      | -955.585156    | 668.7693                          | 711.1133                                           | 561.0557                                 | 0.7                                               | 0.7                                             |
| ChNar_1'      | -955.584777    | 668.4857                          | 710.8517                                           | 560.7709                                 | 1.4                                               | 1.4                                             |
| ChNar_1a'     | -955.584644    | 668.6808                          | 711.0217                                           | 560.9758                                 | 1.9                                               | 1.9                                             |
| ChNar_1a_sT   | -955.575909    | 667.4445                          | 710.1533                                           | 559.9409                                 | 24.0                                              | 23.8                                            |
| ChNar_1a'_sT  | -955.575947    | 667.7455                          | 710.3678                                           | 560.3038                                 | 24.1                                              | 24.1                                            |
| ChNar_1_sT    | -955.575939    | 667.7899                          | 710.3619                                           | 560.4011                                 | 24.1                                              | 24.2                                            |
| ChNar_1'_sT   | -955.575939    | 668.0797                          | 710.5654                                           | 560.7531                                 | 24.3                                              | 24.6                                            |
| ChNar_2a      | -955.577812    | 668.9689                          | 710.9714                                           | 561.6867                                 | 19.8                                              | 20.6                                            |
| ChNar_2a'     | -955.577429    | 669.018                           | 710.9972                                           | 561.7559                                 | 20.8                                              | 21.7                                            |
| ChNar_2       | -955.57563     | 668.7318                          | 710.8368                                           | 561.3916                                 | 25.4                                              | 26.0                                            |
| ChNar_2'      | -955.575196    | 668.7834                          | 710.8701                                           | 561.4592                                 | 26.6                                              | 27.2                                            |
| ChNar_3a      | -955.572168    | 667.7885                          | 710.3775                                           | 560.004                                  | 34.0                                              | 33.7                                            |
| ChNar_3       | -955.5718      | 667.6632                          | 710.2936                                           | 559.8502                                 | 34.9                                              | 34.5                                            |
| ChNar_3a'     | -955.571795    | 667.9592                          | 710.5141                                           | 560.1989                                 | 35.1                                              | 34.9                                            |
| ChNar_3'      | -955.57139     | 667.8956                          | 710.4674                                           | 560.1229                                 | 36.2                                              | 35.9                                            |
| ChNar_4       | -955.505254    | 660.3344                          | 703.1491                                           | 551.6751                                 | 202.5                                             | 201.0                                           |
| ChNar_5       | -955.505744    | 662.7478                          | 705.6293                                           | 554.0401                                 | 203.6                                             | 202.1                                           |
| ChNar_C1      | -955.578577    | 666.5119                          | 707.6753                                           | 559.3643                                 | 14.5                                              | 16.3                                            |
| ChNar_C1'     | -955.577865    | 666.2917                          | 707.5148                                           | 559.1038                                 | 16.2                                              | 17.9                                            |
| ChNar_C1a     | -955.577719    | 666.379                           | 707.7086                                           | 559.1092                                 | 16.8                                              | 18.3                                            |
| ChNar_C1a'    | -955.577058    | 666.1162                          | 707.5132                                           | 558.8007                                 | 18.3                                              | 19.7                                            |
| ChNar_C2a     | -955.574115    | 665.3562                          | 706.6709                                           | 558.0845                                 | 25.2                                              | 26.7                                            |
| ChNar_C2a'    | -955.573425    | 665.1502                          | 706.5251                                           | 557.8366                                 | 26.9                                              | 28.3                                            |
| ChNar_C2      | -955.56727     | 663.3942                          | 705.3817                                           | 555.5507                                 | 41.9                                              | 42.1                                            |
| ChNar_C2'     | -955.566533    | 663.2296                          | 705.2703                                           | 555.3487                                 | 43.7                                              | 43.9                                            |
| ChNar_C3      | -955.561274    | 663.6272                          | 706.3694                                           | 557.2032                                 | 58.6                                              | 59.5                                            |
| Ts ChNar 1_1' | -955.574541    | 665.0331                          | 707.8777                                           | 556.3698                                 | 25.3                                              | 23.9                                            |
| Ts ChNar 1_1a | -955.575656    | 665.4486                          | 708.1306                                           | 556.9771                                 | 22.6                                              | 21.5                                            |

**Table S8.** Positions of the IRMPD bands of protonated naringenin chalcone [ChNar+H]<sup>+</sup> and computed vibrational modes for the lowest-energy **ChNar\_1**

| Wavenumber (cm <sup>-1</sup> ) |                           | Vibrational mode <sup>[b]</sup>             |
|--------------------------------|---------------------------|---------------------------------------------|
| IRMPD                          | Calculated <sup>[a]</sup> |                                             |
| 836                            | 829 (57)                  | βH oop (B ring)                             |
| 953                            | 990 (24)                  | βH oop (Cα and Cβ )                         |
| 1036                           | 1028 (108)                | σ CC (A ring) + σ C-OH(c2')                 |
| 1070                           | 1059 (52)                 | σ CC (Cα , Cγ, C1' C6' and C5') + σ COH +   |
| 1160                           | 1107 (54)                 | βH ip(B ring)                               |
|                                | 1149 (464)                | βH (O2' , O4' and C3')                      |
|                                | 1155 (709)                | βOH (C4) + βH ip (C2 and C3)                |
|                                | 1160 (108)                | βH ip (A ring)                              |
|                                | 1165 (326)                | βHip (B ring)                               |
|                                | 1187 (190)                | βH ip (O4' , O6' and C5')                   |
| 1233                           | 1221 (396)                | σ C1- Cβ + βCH ip (B ring)                  |
|                                | 1236 (416)                | βCH ip (Cα and Cβ )+ σ C1'-Cγ               |
|                                | 1251 (265)                | σ C2'-OH + βCH ip (A ring) + σ CC (A ring)  |
| 1293                           | 1283 (317)                | βCH ip (Cβ ) + σ Cα-Cβ                      |
|                                | 1299 (271)                | σ C4-OH                                     |
| 1323                           | 1318 (266)                | βCH ip (B ring)                             |
|                                | 1331 (27)                 | βOH ip (Cγ) + β ip CH (Cα)                  |
| 1340                           | 1346 (230)                | βOH ip (C2') + βOH ip + σ CC+ σ CγO         |
|                                | 1359 (51)                 | σ CC (B ring) + βOH ip (C4 and Cγ)          |
| 1380                           | 1373 (61)                 | βCH ip (Cα ) + βOH ip (C6') + σ CC (A ring) |
|                                | 1381 (348)                | σ C6'O + σ CγO + βCH ip ( Cβ )              |
| 1450                           | 1434 (297)                | βOH ip (Cγ) + σ CC                          |
|                                | 1450 (63)                 | σ CC (B ring) + βH ip (B ring)              |
| 1530                           | 1506 (186)                | σ CC (A ring) + βH ip (A ring) + σ C4'OH    |
|                                | 1527 (656)                | β OH ip (Cγ)                                |
| 1550                           | 1554 (837)                | σ CC (B ring)                               |
|                                | 1569 (2159)               | σ Cα-Cβ                                     |
|                                | 1580 (126)                | σ CC (A ring)                               |
| 1616                           | 1614 (49)                 | σ CC (B ring)                               |
|                                | 1628 (467)                | σ CC (A ring)                               |

[a] Vibrational frequencies calculated at the B3LYP/6-311++G(d,p) level of theory are scaled by a factor of 0.975. The computed intensities (km mol<sup>-1</sup>) are given in parenthesis. Bands with intensity lower than 20 km mol<sup>-1</sup> are not reported.

[b] β = bending; σ = stretching; oop = out-of-plane; ip= in-plane; the numbering of the atoms follows Figure 1

**Table S9:** Extrapolated and calculated CCS of protonated species

| Compound               | CCS (Å <sup>2</sup> ) exp. | Optimized geometry | CCS (Å <sup>2</sup> ) calculated |
|------------------------|----------------------------|--------------------|----------------------------------|
| [Nar+H] <sup>+</sup>   | 160.9                      | <b>Nar_1</b>       | 160.8                            |
|                        |                            | <b>Nar_1Ax</b>     | 162.4                            |
| [ChNar+H] <sup>+</sup> | 160.9                      | <b>ChNar_1</b>     | 160.1                            |
|                        |                            | <b>ChNar_1_sT</b>  | 158.3                            |

**XYZ coordinates of optimized geometries of the most stable conformer of each family of rotamers/isomers.**

Cartesian coordinates of all the other structures mentioned in this paper are available from the authors upon request.

**Nar\_1**

|   |           |           |           |
|---|-----------|-----------|-----------|
| H | -1.648741 | -2.597665 | 1.183791  |
| C | -2.199992 | -1.726251 | 0.852092  |
| C | -3.638140 | 0.518493  | -0.046952 |
| C | -1.500324 | -0.642016 | 0.345634  |
| C | -3.594800 | -1.681034 | 0.897029  |
| C | -4.324429 | -0.558021 | 0.436547  |
| C | -2.199367 | 0.539458  | -0.100708 |
| H | -5.406390 | -0.581921 | 0.482404  |
| O | -4.248424 | 1.647849  | -0.496716 |
| H | -5.210196 | 1.609070  | -0.411803 |
| C | -1.444121 | 1.664057  | -0.435794 |
| C | 0.044556  | 1.613109  | -0.353633 |
| H | 0.472857  | 2.293527  | -1.092716 |
| H | 0.341387  | 1.991553  | 0.633133  |
| O | -0.175187 | -0.726290 | 0.314781  |
| O | -1.933972 | 2.819388  | -0.793012 |
| H | -2.913464 | 2.802392  | -0.802855 |
| O | -4.335267 | -2.689014 | 1.356247  |
| H | -3.793583 | -3.429165 | 1.661210  |
| C | 0.563892  | 0.195258  | -0.577106 |
| H | 0.317063  | -0.123688 | -1.595066 |
| C | 2.030522  | 0.012707  | -0.338176 |
| C | 4.782828  | -0.330028 | 0.062261  |
| C | 2.620673  | 0.337909  | 0.892069  |
| C | 2.840682  | -0.493199 | -1.356897 |
| C | 4.208497  | -0.660845 | -1.167442 |
| C | 3.979175  | 0.166817  | 1.096972  |
| H | 2.014639  | 0.711387  | 1.710657  |
| H | 2.405787  | -0.760604 | -2.314444 |
| H | 4.824356  | -1.051736 | -1.970876 |
| H | 4.440017  | 0.408918  | 2.046500  |
| O | 6.104889  | -0.466231 | 0.324583  |
| H | 6.574580  | -0.814184 | -0.441711 |

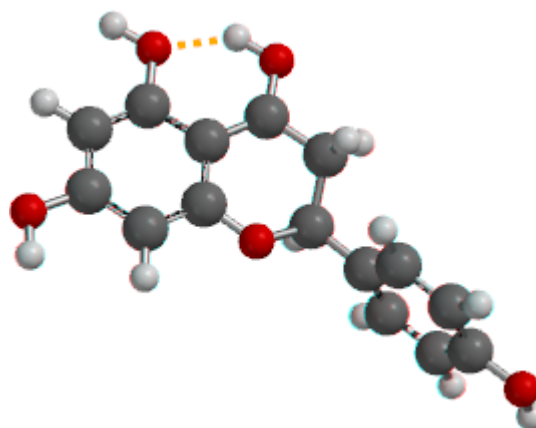

**Nar\_1' \_Ax**

|   |           |          |           |
|---|-----------|----------|-----------|
| H | 0.251087  | 0.396155 | -3.352348 |
| C | -0.289461 | 0.932451 | -2.582220 |
| C | -1.717293 | 2.292192 | -0.577211 |

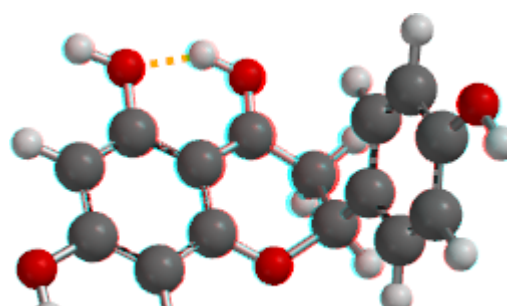

|   |           |           |           |
|---|-----------|-----------|-----------|
| C | 0.259019  | 1.019704  | -1.312167 |
| C | -1.529998 | 1.520102  | -2.834578 |
| C | -2.259094 | 2.196021  | -1.826500 |
| C | -0.429590 | 1.731081  | -0.263587 |
| H | -3.224835 | 2.619560  | -2.073538 |
| O | -2.335933 | 2.928839  | 0.454434  |
| H | -3.183231 | 3.316209  | 0.197743  |
| C | 0.231269  | 1.913982  | 0.950187  |
| C | 1.617465  | 1.393411  | 1.131870  |
| O | 1.444456  | 0.457059  | -1.115258 |
| O | -0.241502 | 2.577994  | 1.970053  |
| H | -1.133150 | 2.935060  | 1.775082  |
| O | -2.121295 | 1.473161  | -4.028408 |
| H | -1.586366 | 1.002070  | -4.681228 |
| C | 1.882127  | 0.162600  | 0.273897  |
| H | 2.956279  | 0.043875  | 0.139559  |
| C | 1.276678  | -1.138109 | 0.738922  |
| C | 0.232467  | -3.629470 | 1.514655  |
| C | 1.642668  | -2.312670 | 0.067410  |
| C | 0.385543  | -1.242482 | 1.815267  |
| C | -0.132481 | -2.470761 | 2.203713  |
| C | 1.127290  | -3.545121 | 0.440664  |
| H | 2.341089  | -2.263361 | -0.761298 |
| H | 0.096590  | -0.371508 | 2.392538  |
| H | -0.810036 | -2.552414 | 3.044379  |
| H | 1.428174  | -4.442479 | -0.090387 |
| O | -0.305990 | -4.797424 | 1.939480  |
| H | 0.024295  | -5.540912 | 1.422310  |
| H | 2.299442  | 2.202641  | 0.838974  |
| H | 1.804315  | 1.192546  | 2.187592  |

#### Nar\_C1a

|   |           |           |           |
|---|-----------|-----------|-----------|
| C | -1.504240 | -0.526494 | 0.235538  |
| C | -2.214731 | 0.598626  | -0.146110 |
| C | -1.508723 | 1.813122  | -0.560651 |
| C | -0.005693 | 1.768835  | -0.438715 |
| H | 0.435772  | 2.478059  | -1.141198 |
| H | 0.252590  | 2.115143  | 0.569018  |
| O | -0.214961 | -0.647531 | 0.125907  |
| O | -2.120291 | 2.815751  | -0.919212 |
| C | 0.557022  | 0.375642  | -0.702433 |
| H | 0.332056  | 0.069977  | -1.727504 |
| C | 2.008659  | 0.181874  | -0.422093 |
| C | 4.743961  | -0.202562 | 0.050736  |

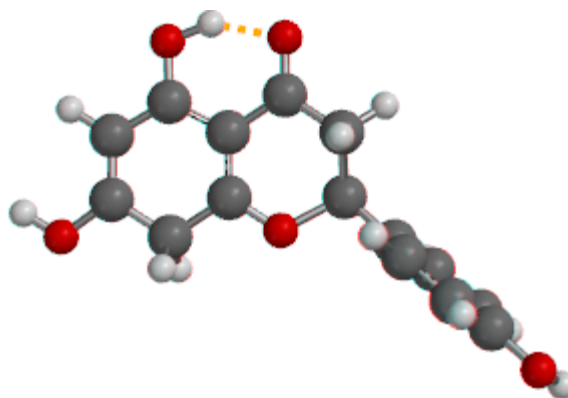

|   |           |           |           |
|---|-----------|-----------|-----------|
| C | 2.586161  | 0.569440  | 0.796982  |
| C | 2.824778  | -0.406164 | -1.392792 |
| C | 4.183324  | -0.594050 | -1.168355 |
| C | 3.935122  | 0.377212  | 1.037684  |
| H | 1.980331  | 1.016518  | 1.577585  |
| H | 2.400772  | -0.716783 | -2.342164 |
| H | 4.803709  | -1.044281 | -1.936213 |
| H | 4.386333  | 0.669691  | 1.977474  |
| O | 6.055558  | -0.352979 | 0.346205  |
| H | 6.534104  | -0.751757 | -0.389555 |
| C | -3.646143 | 0.593554  | -0.027679 |
| C | -4.363334 | -0.516022 | 0.487210  |
| H | -5.442739 | -0.443930 | 0.549188  |
| C | -3.677160 | -1.616732 | 0.903599  |
| C | -2.187557 | -1.724730 | 0.815277  |
| H | -1.777482 | -1.925674 | 1.813395  |
| H | -1.924740 | -2.607968 | 0.219850  |
| O | -4.224929 | -2.705660 | 1.421909  |
| H | -5.189406 | -2.643488 | 1.484564  |
| O | -4.328597 | 1.637011  | -0.390310 |
| H | -3.689527 | 2.346348  | -0.707135 |

#### Nar\_C2

|   |           |           |           |
|---|-----------|-----------|-----------|
| C | -1.480384 | -0.578761 | 0.272719  |
| C | -2.195611 | 0.583145  | -0.145837 |
| C | -1.483742 | 1.794237  | -0.555016 |
| C | 0.016543  | 1.751858  | -0.431045 |
| H | 0.460148  | 2.458149  | -1.135211 |
| H | 0.276967  | 2.098213  | 0.576144  |
| O | -0.185617 | -0.657966 | 0.158297  |
| O | -2.099409 | 2.793483  | -0.922051 |
| C | 0.573829  | 0.354434  | -0.686441 |
| H | 0.346496  | 0.041910  | -1.708597 |
| C | 2.028225  | 0.165196  | -0.412291 |
| C | 4.768188  | -0.202079 | 0.045823  |
| C | 2.607481  | 0.546349  | 0.807674  |
| C | 2.844417  | -0.408116 | -1.391336 |
| C | 4.205452  | -0.587575 | -1.174020 |
| C | 3.959055  | 0.362314  | 1.041241  |
| H | 2.000789  | 0.980675  | 1.594809  |
| H | 2.418681  | -0.714428 | -2.341331 |
| H | 4.826078  | -1.026676 | -1.948142 |
| H | 4.411912  | 0.649683  | 1.981840  |
| O | 6.082496  | -0.344884 | 0.334339  |

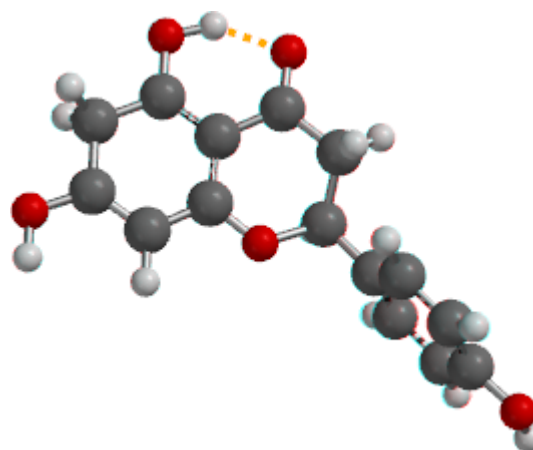

|   |           |           |           |
|---|-----------|-----------|-----------|
| H | 6.560724  | -0.732868 | -0.407355 |
| C | -3.583790 | 0.593500  | -0.048517 |
| C | -3.490984 | -1.714595 | 0.941622  |
| O | -4.213329 | -2.714034 | 1.426633  |
| H | -3.668828 | -3.458878 | 1.720658  |
| O | -4.296879 | 1.617584  | -0.398421 |
| H | -3.665696 | 2.337626  | -0.718081 |
| C | -4.343240 | -0.572562 | 0.488744  |
| H | -5.050641 | -0.926077 | -0.273401 |
| H | -4.974102 | -0.232486 | 1.320092  |
| C | -2.132272 | -1.707703 | 0.838817  |
| H | -1.522956 | -2.548669 | 1.147639  |

### Nar\_2a

|   |           |           |           |
|---|-----------|-----------|-----------|
| H | -1.648741 | -2.597665 | 1.183791  |
| C | -2.199992 | -1.726251 | 0.852092  |
| C | -3.638140 | 0.518493  | -0.046952 |
| C | -1.500324 | -0.642016 | 0.345634  |
| C | -3.594800 | -1.681034 | 0.897029  |
| C | -4.324429 | -0.558021 | 0.436547  |
| C | -2.199367 | 0.539458  | -0.100708 |
| H | -5.406390 | -0.581921 | 0.482404  |
| O | -4.248424 | 1.647849  | -0.496716 |
| H | -5.210196 | 1.609070  | -0.411803 |
| C | -1.444121 | 1.664057  | -0.435794 |
| C | 0.044556  | 1.613109  | -0.353633 |
| H | 0.472857  | 2.293527  | -1.092716 |
| H | 0.341387  | 1.991553  | 0.633133  |
| O | -0.175187 | -0.726290 | 0.314781  |
| O | -1.933972 | 2.819388  | -0.793012 |
| H | -2.913464 | 2.802392  | -0.802855 |
| O | -4.335267 | -2.689014 | 1.356247  |
| H | -3.793583 | -3.429165 | 1.661210  |
| C | 0.563892  | 0.195258  | -0.577106 |
| H | 0.317063  | -0.123688 | -1.595066 |
| C | 2.030522  | 0.012707  | -0.338176 |
| C | 4.782828  | -0.330028 | 0.062261  |
| C | 2.620673  | 0.337909  | 0.892069  |
| C | 2.840682  | -0.493199 | -1.356897 |
| C | 4.208497  | -0.660845 | -1.167442 |
| C | 3.979175  | 0.166817  | 1.096972  |
| H | 2.014639  | 0.711387  | 1.710657  |
| H | 2.405787  | -0.760604 | -2.314444 |
| H | 4.824356  | -1.051736 | -1.970876 |

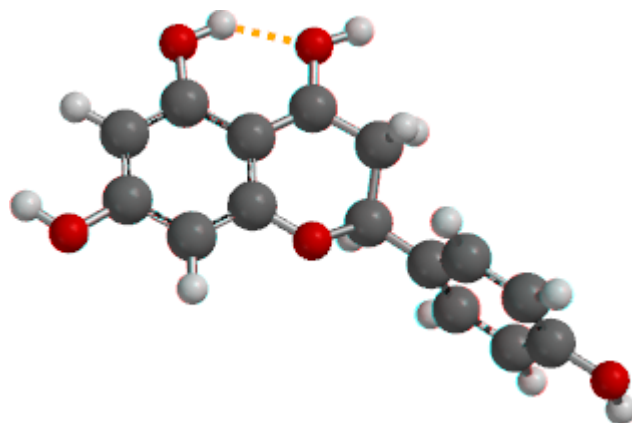

|   |          |           |           |
|---|----------|-----------|-----------|
| H | 4.440017 | 0.408918  | 2.046500  |
| O | 6.104889 | -0.466231 | 0.324583  |
| H | 6.574580 | -0.814184 | -0.441711 |

### Nar\_3

|   |           |           |           |
|---|-----------|-----------|-----------|
| H | -1.648741 | -2.597665 | 1.183791  |
| C | -2.199992 | -1.726251 | 0.852092  |
| C | -3.638140 | 0.518493  | -0.046952 |
| C | -1.500324 | -0.642016 | 0.345634  |
| C | -3.594800 | -1.681034 | 0.897029  |
| C | -4.324429 | -0.558021 | 0.436547  |
| C | -2.199367 | 0.539458  | -0.100708 |
| H | -5.406390 | -0.581921 | 0.482404  |
| O | -4.248424 | 1.647849  | -0.496716 |
| H | -5.210196 | 1.609070  | -0.411803 |
| C | -1.444121 | 1.664057  | -0.435794 |
| C | 0.044556  | 1.613109  | -0.353633 |
| H | 0.472857  | 2.293527  | -1.092716 |
| H | 0.341387  | 1.991553  | 0.633133  |
| O | -0.175187 | -0.726290 | 0.314781  |
| O | -1.933972 | 2.819388  | -0.793012 |
| H | -2.913464 | 2.802392  | -0.802855 |
| O | -4.335267 | -2.689014 | 1.356247  |
| H | -3.793583 | -3.429165 | 1.661210  |
| C | 0.563892  | 0.195258  | -0.577106 |
| H | 0.317063  | -0.123688 | -1.595066 |
| C | 2.030522  | 0.012707  | -0.338176 |
| C | 4.782828  | -0.330028 | 0.062261  |
| C | 2.620673  | 0.337909  | 0.892069  |
| C | 2.840682  | -0.493199 | -1.356897 |
| C | 4.208497  | -0.660845 | -1.167442 |
| C | 3.979175  | 0.166817  | 1.096972  |
| H | 2.014639  | 0.711387  | 1.710657  |
| H | 2.405787  | -0.760604 | -2.314444 |
| H | 4.824356  | -1.051736 | -1.970876 |
| H | 4.440017  | 0.408918  | 2.046500  |
| O | 6.104889  | -0.466231 | 0.324583  |
| H | 6.574580  | -0.814184 | -0.441711 |

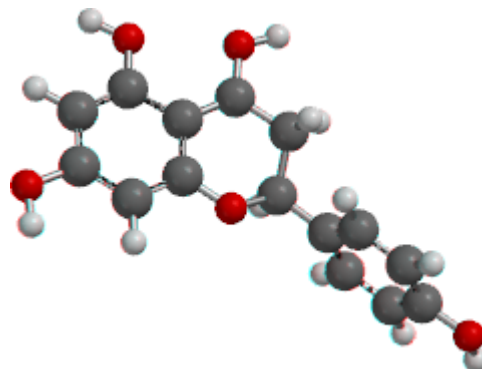

### Nar\_4

|   |           |           |           |
|---|-----------|-----------|-----------|
| H | -1.653611 | -2.490867 | 1.076289  |
| C | -2.167607 | -1.602986 | 0.736928  |
| C | -3.565492 | 0.690436  | -0.199483 |
| C | -1.456464 | -0.493264 | 0.237824  |

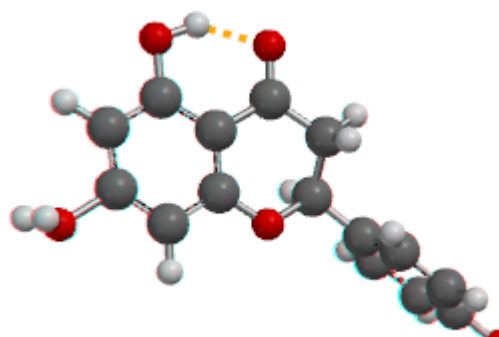



|   |           |           |           |
|---|-----------|-----------|-----------|
| C | -3.531602 | -1.468163 | 0.724949  |
| C | -4.294236 | -0.411294 | 0.288913  |
| C | -2.145332 | 0.653772  | -0.214932 |
| H | -5.375533 | -0.378418 | 0.316948  |
| O | -4.246002 | 1.745378  | -0.614431 |
| H | -3.595495 | 2.439907  | -0.897629 |
| C | -1.383672 | 1.850029  | -0.608237 |
| C | 0.112337  | 1.766045  | -0.432860 |
| H | 0.595170  | 2.455523  | -1.127265 |
| H | 0.350268  | 2.107691  | 0.581785  |
| O | -0.128122 | -0.589953 | 0.226721  |
| O | -1.947552 | 2.862516  | -1.011771 |
| C | 0.622936  | 0.343097  | -0.652999 |
| H | 0.384015  | 0.025766  | -1.673680 |
| C | 2.086310  | 0.137998  | -0.402533 |
| C | 4.832402  | -0.248577 | 0.011350  |
| C | 2.676352  | 0.474880  | 0.820210  |
| C | 2.895234  | -0.400616 | -1.409688 |
| C | 4.255993  | -0.589711 | -1.214718 |
| C | 4.035155  | 0.281106  | 1.032671  |
| H | 2.076112  | 0.880468  | 1.627365  |
| H | 2.457951  | -0.673188 | -2.364792 |
| H | 4.884513  | -1.000574 | -1.994933 |
| H | 4.477948  | 0.541789  | 1.988677  |
| O | 6.166080  | -0.457052 | 0.148590  |
| H | 6.467576  | -0.187718 | 1.023138  |
| O | -4.273384 | -2.673856 | 1.257516  |
| H | -4.886581 | -3.073920 | 0.612572  |
| H | -4.725666 | -2.516244 | 2.107503  |

#### Nar\_5

|   |           |           |           |
|---|-----------|-----------|-----------|
| H | -2.034495 | -2.286126 | 1.596410  |
| C | -2.564120 | -1.469790 | 1.120112  |
| C | -3.940011 | 0.627446  | -0.160016 |
| C | -1.862249 | -0.482977 | 0.460450  |
| C | -3.969720 | -1.393333 | 1.137260  |
| C | -4.656573 | -0.363704 | 0.500700  |
| C | -2.511432 | 0.591822  | -0.189672 |
| H | -5.737346 | -0.330072 | 0.523908  |
| O | -4.611308 | 1.615475  | -0.752691 |
| H | -3.960811 | 2.243786  | -1.142172 |
| C | -1.752968 | 1.658680  | -0.797253 |
| C | -0.238511 | 1.556025  | -0.680364 |
| H | 0.210605  | 2.056401  | -1.540455 |

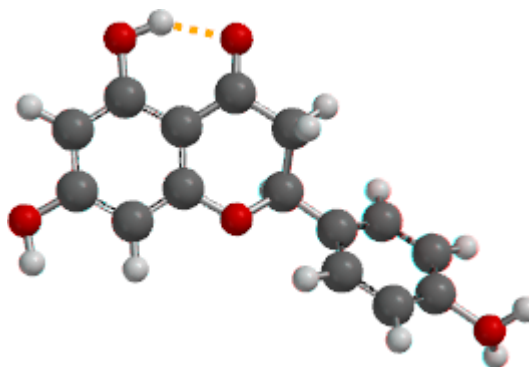

|   |           |           |           |
|---|-----------|-----------|-----------|
| H | 0.073987  | 2.093357  | 0.222701  |
| O | -0.488737 | -0.571874 | 0.479379  |
| O | -2.263222 | 2.628327  | -1.363066 |
| O | -4.718870 | -2.327548 | 1.763863  |
| H | -4.160882 | -2.996037 | 2.176402  |
| C | 0.192583  | 0.087865  | -0.589684 |
| H | -0.070575 | -0.420956 | -1.527324 |
| C | 1.680275  | -0.059927 | -0.355639 |
| C | 4.365905  | -0.239634 | 0.037555  |
| C | 2.183807  | -0.386700 | 0.907667  |
| C | 2.564616  | 0.165185  | -1.418881 |
| C | 3.942977  | 0.079459  | -1.236486 |
| C | 3.558950  | -0.482370 | 1.124901  |
| H | 1.497228  | -0.574957 | 1.721835  |
| H | 2.183237  | 0.405396  | -2.404850 |
| H | 4.629418  | 0.250567  | -2.057539 |
| H | 3.967755  | -0.734255 | 2.095236  |
| O | 5.846515  | -0.348770 | 0.297786  |
| H | 6.345095  | 0.485296  | 0.218000  |
| H | 6.298879  | -1.076060 | -0.168072 |

#### Nar\_6

|   |           |           |           |
|---|-----------|-----------|-----------|
| H | -1.653611 | -2.490867 | 1.076289  |
| C | -2.167607 | -1.602986 | 0.736928  |
| C | -3.565492 | 0.690436  | -0.199483 |
| C | -1.456464 | -0.493264 | 0.237824  |
| C | -3.531602 | -1.468163 | 0.724949  |
| C | -4.294236 | -0.411294 | 0.288913  |
| C | -2.145332 | 0.653772  | -0.214932 |
| H | -5.375533 | -0.378418 | 0.316948  |
| O | -4.246002 | 1.745378  | -0.614431 |
| H | -3.595495 | 2.439907  | -0.897629 |
| C | -1.383672 | 1.850029  | -0.608237 |
| C | 0.112337  | 1.766045  | -0.432860 |
| H | 0.595170  | 2.455523  | -1.127265 |
| H | 0.350268  | 2.107691  | 0.581785  |
| O | -0.128122 | -0.589953 | 0.226721  |
| O | -1.947552 | 2.862516  | -1.011771 |
| C | 0.622936  | 0.343097  | -0.652999 |
| H | 0.384015  | 0.025766  | -1.673680 |
| C | 2.086310  | 0.137998  | -0.402533 |
| C | 4.832402  | -0.248577 | 0.011350  |
| C | 2.676352  | 0.474880  | 0.820210  |
| C | 2.895234  | -0.400616 | -1.409688 |

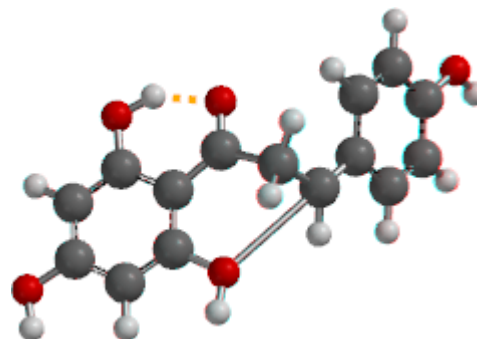

|   |           |           |           |
|---|-----------|-----------|-----------|
| C | 4.255993  | -0.589711 | -1.214718 |
| C | 4.035155  | 0.281106  | 1.032671  |
| H | 2.076112  | 0.880468  | 1.627365  |
| H | 2.457951  | -0.673188 | -2.364792 |
| H | 4.884513  | -1.000574 | -1.994933 |
| H | 4.477948  | 0.541789  | 1.988677  |
| O | 6.166080  | -0.457052 | 0.148590  |
| H | 6.467576  | -0.187718 | 1.023138  |
| O | -4.273384 | -2.673856 | 1.257516  |
| H | -4.886581 | -3.073920 | 0.612572  |
| H | -4.725666 | -2.516244 | 2.107503  |

**Ts Nar 1-1'**

|   |           |           |           |
|---|-----------|-----------|-----------|
| H | -1.637612 | -2.616933 | 1.192971  |
| C | -2.192570 | -1.751012 | 0.853317  |
| C | -3.641008 | 0.478560  | -0.067522 |
| C | -1.498781 | -0.670615 | 0.332662  |
| C | -3.587858 | -1.710058 | 0.901027  |
| C | -4.322282 | -0.594890 | 0.429484  |
| C | -2.202288 | 0.503740  | -0.124778 |
| H | -5.404026 | -0.622201 | 0.477851  |
| O | -4.255686 | 1.600716  | -0.528531 |
| H | -5.217511 | 1.559592  | -0.443378 |
| C | -1.451688 | 1.627467  | -0.472225 |
| C | 0.037672  | 1.581332  | -0.394167 |
| H | 0.461741  | 2.252522  | -1.144040 |
| H | 0.338258  | 1.972649  | 0.586403  |
| O | -0.172617 | -0.750973 | 0.299369  |
| O | -1.945431 | 2.778447  | -0.836867 |
| H | -2.925021 | 2.759184  | -0.844048 |
| O | -4.323501 | -2.714943 | 1.373203  |
| H | -3.779506 | -3.450560 | 1.685522  |
| C | 0.558070  | 0.161391  | -0.600581 |
| H | 0.315819  | -0.168743 | -1.615957 |
| C | 2.028730  | -0.011314 | -0.355239 |
| C | 4.775660  | -0.333595 | 0.054796  |
| C | 2.597100  | 0.276943  | 0.891361  |
| C | 2.850126  | -0.472516 | -1.386995 |
| C | 4.218365  | -0.632629 | -1.187283 |
| C | 3.960077  | 0.109020  | 1.099812  |
| H | 1.975765  | 0.607671  | 1.716812  |
| H | 2.422514  | -0.716309 | -2.354072 |
| H | 4.858010  | -1.002157 | -1.979627 |
| H | 4.404797  | 0.305525  | 2.067915  |

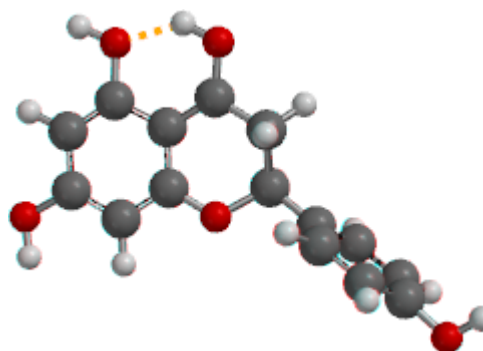

|   |          |           |          |
|---|----------|-----------|----------|
| O | 6.113097 | -0.568259 | 0.284073 |
| H | 6.641585 | 0.212947  | 0.088730 |

### Ts Nar 1-1a

|   |           |           |           |
|---|-----------|-----------|-----------|
| H | -1.652465 | -2.619772 | 1.177277  |
| C | -2.183469 | -1.735910 | 0.850759  |
| C | -3.615410 | 0.509126  | -0.058671 |
| C | -1.477971 | -0.650754 | 0.340653  |
| C | -3.571000 | -1.687599 | 0.898298  |
| C | -4.300775 | -0.571128 | 0.429601  |
| C | -2.179136 | 0.526089  | -0.107762 |
| H | -5.383659 | -0.600424 | 0.451307  |
| O | -4.225191 | 1.634987  | -0.520739 |
| H | -5.188013 | 1.592866  | -0.449142 |
| C | -1.421428 | 1.652411  | -0.451502 |
| C | 0.065959  | 1.601496  | -0.363502 |
| H | 0.498298  | 2.285242  | -1.097011 |
| H | 0.355758  | 1.976019  | 0.627145  |
| O | -0.154238 | -0.737595 | 0.305207  |
| O | -1.913683 | 2.800356  | -0.817128 |
| H | -2.894225 | 2.780263  | -0.832147 |
| O | -4.260785 | -2.786214 | 1.299824  |
| H | -4.482456 | -2.772673 | 2.239350  |
| C | 0.584726  | 0.183195  | -0.588271 |
| H | 0.333990  | -0.136227 | -1.605296 |
| C | 2.051464  | -0.000922 | -0.355051 |
| C | 4.802965  | -0.358386 | 0.035597  |
| C | 2.652051  | 0.345883  | 0.864281  |
| C | 2.850867  | -0.535957 | -1.367647 |
| C | 4.218109  | -0.711191 | -1.183054 |
| C | 4.010232  | 0.168022  | 1.064254  |
| H | 2.054946  | 0.740939  | 1.679202  |
| H | 2.407390  | -0.821631 | -2.315869 |
| H | 4.825228  | -1.125583 | -1.981256 |
| H | 4.479243  | 0.426529  | 2.005365  |
| O | 6.125175  | -0.499689 | 0.292785  |
| H | 6.587501  | -0.871769 | -0.466862 |

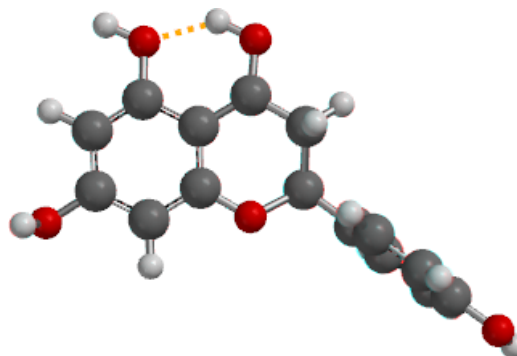

### ChNar\_1

|   |          |          |           |
|---|----------|----------|-----------|
| C | 0.442541 | 3.564220 | -0.792325 |
| C | 0.343183 | 3.602851 | 1.974926  |
| C | 0.181860 | 2.319394 | -0.128512 |
| C | 0.660511 | 4.750842 | -0.129469 |

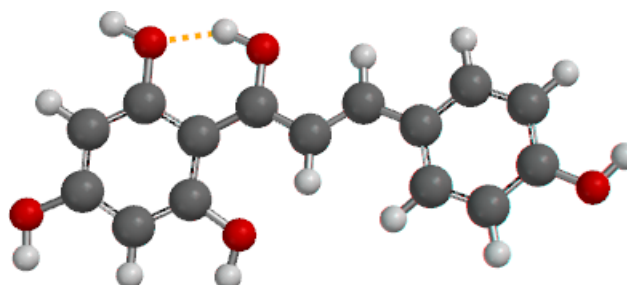

|   |           |           |           |
|---|-----------|-----------|-----------|
| C | 0.613329  | 4.773832  | 1.267007  |
| C | 0.129041  | 2.408248  | 1.300706  |
| H | 0.866618  | 5.668117  | -0.668149 |
| H | 0.288686  | 3.621178  | 3.058975  |
| O | 0.832184  | 5.957606  | 1.857042  |
| H | 0.782953  | 5.895291  | 2.818658  |
| O | -0.160757 | 1.295131  | 2.010379  |
| H | -0.199794 | 1.496067  | 2.953077  |
| C | -0.025538 | 1.083851  | -0.870211 |
| C | -0.063914 | -0.213464 | -0.306061 |
| H | 0.093187  | -0.305219 | 0.752156  |
| C | -0.283699 | -1.327798 | -1.084081 |
| H | -0.451630 | -1.171596 | -2.145052 |
| C | -0.322548 | -2.686492 | -0.647782 |
| C | -0.435880 | -5.395788 | 0.086936  |
| C | -0.564976 | -3.697329 | -1.608474 |
| C | -0.135878 | -3.086524 | 0.701013  |
| C | -0.191574 | -4.410960 | 1.064149  |
| C | -0.622158 | -5.030676 | -1.255210 |
| H | -0.709796 | -3.415420 | -2.645581 |
| H | -0.051763 | -4.724756 | 2.091001  |
| H | -0.809219 | -5.791064 | -2.005987 |
| O | -0.477379 | -6.668281 | 0.513344  |
| H | -0.650533 | -7.280302 | -0.212681 |
| H | 0.052938  | -2.344471 | 1.466728  |
| O | -0.177294 | 1.120626  | -2.186556 |
| H | -0.072392 | 2.023954  | -2.540875 |
| O | 0.486188  | 3.545055  | -2.159481 |
| H | 0.633504  | 4.423876  | -2.529608 |

#### ChNar\_1a\_sT

|   |           |          |           |
|---|-----------|----------|-----------|
| C | -0.325390 | 2.996463 | -1.725518 |
| C | -1.254877 | 3.208320 | 0.883261  |
| C | -0.730755 | 1.805187 | -1.060982 |
| C | -0.317690 | 4.233323 | -1.106714 |
| C | -0.782384 | 4.335642 | 0.209793  |
| C | -1.236686 | 1.969137 | 0.264012  |
| H | 0.027995  | 5.110902 | -1.642948 |
| H | -1.648660 | 3.325516 | 1.886035  |
| O | -0.820092 | 5.497166 | 0.882780  |
| H | -0.486464 | 6.231711 | 0.353632  |
| O | -1.747072 | 0.882023 | 0.887457  |
| H | -2.175424 | 1.139583 | 1.712699  |

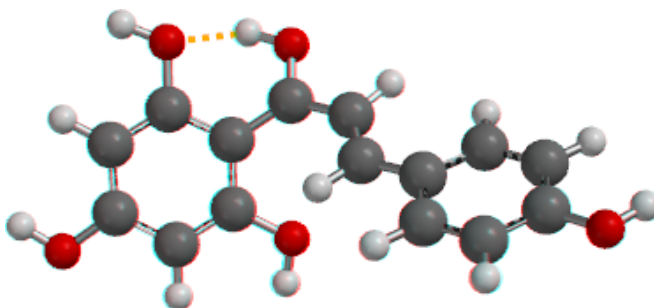

|   |           |           |           |
|---|-----------|-----------|-----------|
| C | -0.717833 | 0.522007  | -1.752054 |
| C | -0.432293 | -0.742548 | -1.206790 |
| O | -0.994961 | 0.469367  | -3.047988 |
| H | -1.042423 | 1.354946  | -3.443683 |
| O | 0.068097  | 2.859279  | -3.025032 |
| H | 0.360716  | 3.698677  | -3.399585 |
| H | -0.667641 | -1.571982 | -1.863451 |
| C | 0.241911  | -0.947184 | -0.027255 |
| H | 0.552817  | -0.071398 | 0.532693  |
| C | 0.636385  | -2.196166 | 0.536425  |
| C | 1.480067  | -4.591679 | 1.735945  |
| C | 1.438259  | -2.191534 | 1.706414  |
| C | 0.268763  | -3.451167 | -0.009044 |
| C | 0.679048  | -4.627515 | 0.577645  |
| C | 1.857894  | -3.361612 | 2.298249  |
| H | 1.731898  | -1.242006 | 2.140422  |
| H | -0.349813 | -3.500472 | -0.896336 |
| H | 0.386570  | -5.582052 | 0.152666  |
| H | 2.472435  | -3.360941 | 3.189387  |
| O | 1.914671  | -5.700441 | 2.353018  |
| H | 1.612932  | -6.500555 | 1.904846  |

#### ChNar\_2a

|   |           |           |           |
|---|-----------|-----------|-----------|
| C | 0.606601  | 3.633703  | -0.801667 |
| C | 0.134558  | 3.640460  | 1.968108  |
| C | 0.228532  | 2.387992  | -0.156149 |
| C | 0.775146  | 4.800455  | -0.072548 |
| C | 0.545280  | 4.806053  | 1.300227  |
| C | -0.024068 | 2.471097  | 1.265873  |
| H | 1.076115  | 5.695299  | -0.603444 |
| H | -0.066082 | 3.689754  | 3.031711  |
| O | 0.682262  | 5.900341  | 2.057207  |
| H | 0.964855  | 6.661949  | 1.534833  |
| O | 0.854400  | 3.749272  | -2.109010 |
| H | 0.643303  | 2.927905  | -2.576954 |
| O | -0.454599 | 1.350951  | 1.891403  |
| H | -0.642352 | 1.539647  | 2.819275  |
| C | 0.129098  | 1.164128  | -0.870293 |
| C | 0.086645  | -0.144324 | -0.325136 |
| H | 0.352480  | -0.239494 | 0.713751  |
| C | -0.316826 | -1.249950 | -1.033230 |
| H | -0.720562 | -1.112885 | -2.036279 |
| C | -0.338130 | -2.606757 | -0.581651 |
| C | -0.446667 | -5.298975 | 0.214324  |

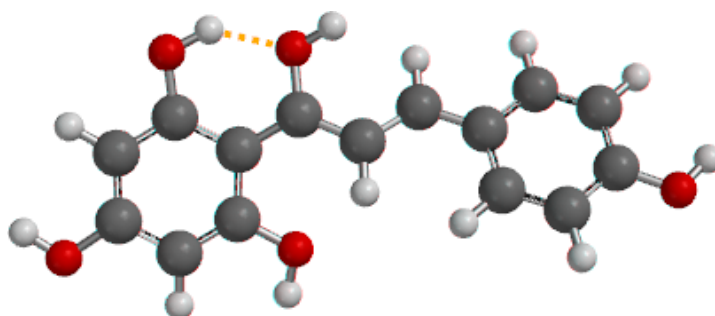

|   |           |           |           |
|---|-----------|-----------|-----------|
| C | -0.908999 | -3.595070 | -1.418032 |
| C | 0.183679  | -3.019583 | 0.671296  |
| C | 0.133158  | -4.335931 | 1.063711  |
| C | -0.968021 | -4.919207 | -1.032487 |
| H | -1.315669 | -3.307323 | -2.381501 |
| H | 0.533954  | -4.659337 | 2.016119  |
| H | -1.411913 | -5.662176 | -1.686502 |
| O | -0.463086 | -6.563466 | 0.661684  |
| H | -0.873225 | -7.161702 | 0.024618  |
| H | 0.639357  | -2.295335 | 1.334966  |
| O | 0.098425  | 1.295490  | -2.220494 |
| H | 0.282347  | 0.457018  | -2.663733 |

### ChNar\_3a

|   |           |           |           |
|---|-----------|-----------|-----------|
| C | 0.744500  | 3.536422  | -0.765851 |
| C | -0.014580 | 3.605258  | 1.932844  |
| C | 0.200127  | 2.347249  | -0.172162 |
| C | 0.902723  | 4.702455  | -0.031621 |
| C | 0.517613  | 4.738721  | 1.311223  |
| C | -0.162618 | 2.437262  | 1.212754  |
| H | 1.336756  | 5.579551  | -0.500806 |
| H | -0.316232 | 3.668657  | 2.971513  |
| O | 0.634370  | 5.836590  | 2.072589  |
| H | 1.002786  | 6.579561  | 1.578997  |
| O | 1.156509  | 3.472848  | -2.044454 |
| H | 1.561339  | 4.306819  | -2.311564 |
| O | -0.705353 | 1.340092  | 1.789359  |
| H | -0.970676 | 1.536593  | 2.696174  |
| C | 0.009042  | 1.140781  | -0.926472 |
| C | 0.043763  | -0.165816 | -0.373629 |
| H | 0.435989  | -0.251776 | 0.627088  |
| C | -0.427749 | -1.277255 | -1.026143 |
| H | -0.945825 | -1.140901 | -1.975308 |
| C | -0.378167 | -2.635331 | -0.580863 |
| C | -0.353165 | -5.331293 | 0.208293  |
| C | -1.038505 | -3.627207 | -1.343159 |
| C | 0.304433  | -3.046379 | 0.592466  |
| C | 0.319827  | -4.364987 | 0.981004  |
| C | -1.033910 | -4.953338 | -0.959328 |
| H | -1.565613 | -3.340508 | -2.246759 |
| H | 0.843303  | -4.686718 | 1.872458  |
| H | -1.549961 | -5.698960 | -1.554726 |
| O | -0.298344 | -6.598326 | 0.647499  |
| H | -0.785153 | -7.197324 | 0.067747  |

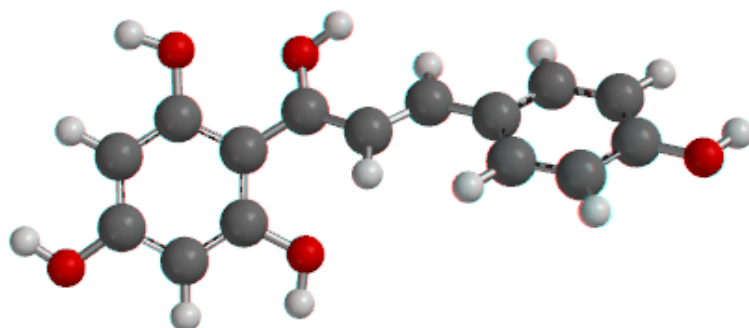

|   |           |           |           |
|---|-----------|-----------|-----------|
| H | 0.834863  | -2.319774 | 1.195326  |
| O | -0.198327 | 1.316991  | -2.226633 |
| H | -0.103764 | 0.490039  | -2.717854 |

#### ChNar\_4

|   |           |           |           |
|---|-----------|-----------|-----------|
| C | 0.174334  | 3.446494  | -0.955796 |
| C | 0.392483  | 3.557859  | 1.856068  |
| C | 0.093516  | 2.227843  | -0.200937 |
| C | 0.373940  | 4.696118  | -0.319694 |
| C | 0.470266  | 4.658782  | 1.038520  |
| C | 0.196935  | 2.325612  | 1.206828  |
| H | 0.435806  | 5.590864  | -0.925291 |
| H | 0.473607  | 3.632755  | 2.932312  |
| O | 0.071785  | 3.479042  | -2.262984 |
| H | -0.081460 | 2.501832  | -2.545071 |
| O | 0.097661  | 1.207574  | 1.958885  |
| H | 0.189298  | 1.409090  | 2.897084  |
| C | -0.091755 | 0.955781  | -0.992209 |
| O | -0.226068 | 1.082780  | -2.232621 |
| C | -0.099376 | -0.358798 | -0.388992 |
| H | 0.026402  | -0.447934 | 0.675170  |
| C | -0.256618 | -1.457031 | -1.181052 |
| H | -0.372138 | -1.274012 | -2.245901 |
| C | -0.288649 | -2.840014 | -0.780134 |
| C | -0.366034 | -5.574084 | -0.128335 |
| C | -0.429213 | -3.830259 | -1.778160 |
| C | -0.189769 | -3.268746 | 0.560675  |
| C | -0.228685 | -4.611010 | 0.885460  |
| C | -0.466884 | -5.175655 | -1.466352 |
| H | -0.508032 | -3.522954 | -2.815401 |
| H | -0.154720 | -4.925925 | 1.921783  |
| H | -0.572639 | -5.932535 | -2.233282 |
| O | -0.408752 | -6.900060 | 0.126046  |
| H | -0.329393 | -7.073736 | 1.070999  |
| H | -0.086529 | -2.542558 | 1.357994  |
| O | 0.684939  | 5.967691  | 1.765211  |
| H | -0.054550 | 6.595344  | 1.658825  |
| H | 1.530293  | 6.399848  | 1.540352  |

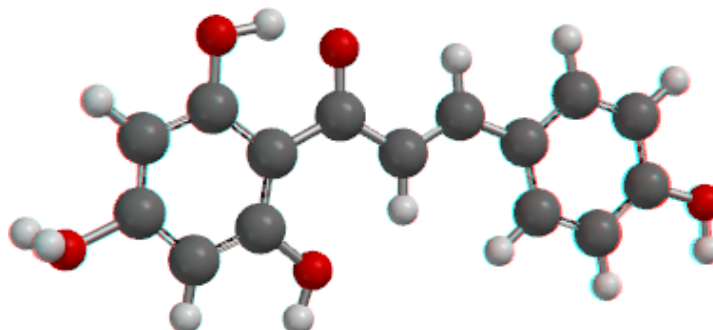

#### ChNar\_5

|   |          |          |           |
|---|----------|----------|-----------|
| C | 0.243688 | 3.879489 | -0.940894 |
| C | 0.562125 | 3.933390 | 1.833357  |
| C | 0.229591 | 2.627064 | -0.221858 |
| C | 0.404016 | 5.100996 | -0.286307 |

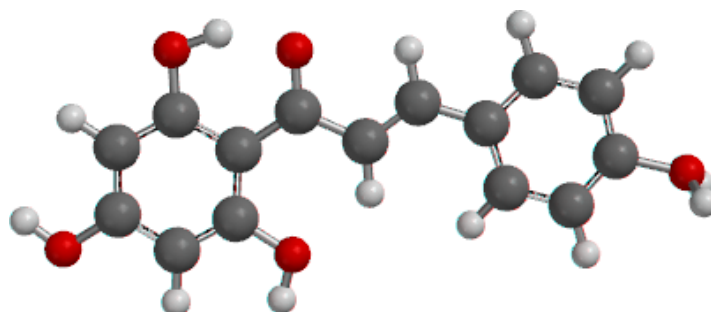



|   |           |           |           |
|---|-----------|-----------|-----------|
| C | 0.563593  | 5.123504  | 1.089330  |
| C | 0.400239  | 2.723061  | 1.194202  |
| H | 0.403720  | 6.006651  | -0.880843 |
| H | 0.692744  | 3.987966  | 2.908198  |
| O | 0.729793  | 6.263607  | 1.792848  |
| H | 0.721590  | 7.029508  | 1.206598  |
| O | 0.103217  | 3.928686  | -2.260370 |
| H | 0.008055  | 2.990722  | -2.581978 |
| O | 0.407211  | 1.576487  | 1.943513  |
| H | 0.536958  | 1.811065  | 2.869370  |
| C | 0.047041  | 1.404551  | -0.995206 |
| O | -0.068415 | 1.445821  | -2.237568 |
| C | -0.022545 | 0.051255  | -0.363078 |
| H | 0.075181  | -0.017145 | 0.707935  |
| C | -0.200274 | -1.026141 | -1.144540 |
| H | -0.278546 | -0.857692 | -2.214228 |
| C | -0.292223 | -2.416991 | -0.702549 |
| C | -0.465346 | -5.058269 | 0.002134  |
| C | -0.401468 | -3.422569 | -1.682135 |
| C | -0.278609 | -2.801519 | 0.654180  |
| C | -0.365504 | -4.137094 | 1.027497  |
| C | -0.489164 | -4.770159 | -1.343294 |
| H | -0.415640 | -3.144242 | -2.729042 |
| H | -0.356515 | -4.427046 | 2.072037  |
| H | -0.569882 | -5.544897 | -2.095041 |
| H | -0.204608 | -2.052935 | 1.432121  |
| O | -0.563338 | -6.519488 | 0.353599  |
| H | -1.381837 | -6.786313 | 0.811090  |
| H | 0.225148  | -6.901324 | 0.780922  |

#### ChNar\_C1

|   |           |           |           |
|---|-----------|-----------|-----------|
| C | 0.050709  | 3.538527  | -0.896854 |
| C | -0.012115 | 2.287973  | -0.139887 |
| O | 0.151219  | 3.569980  | -2.128004 |
| H | 0.179822  | 2.084706  | -2.465087 |
| C | 0.063867  | 1.033078  | -0.884192 |
| C | 0.039885  | -0.273764 | -0.331119 |
| H | -0.031281 | -0.375112 | 0.735934  |
| C | 0.099821  | -1.381318 | -1.143887 |
| H | 0.158236  | -1.206159 | -2.213729 |
| C | 0.090318  | -2.752467 | -0.742618 |
| C | 0.074664  | -5.482852 | -0.082118 |
| C | 0.130425  | -3.749238 | -1.745816 |
| C | 0.044030  | -3.176585 | 0.609886  |

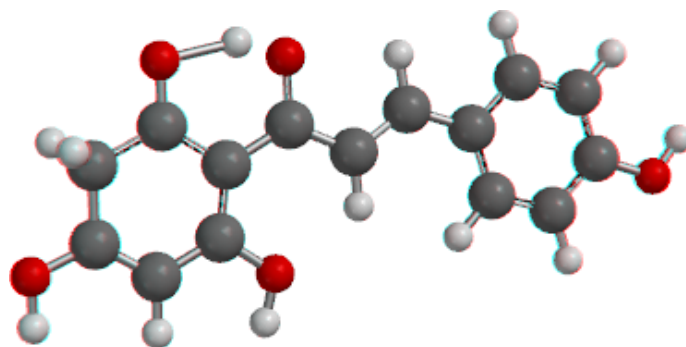

|   |           |           |           |
|---|-----------|-----------|-----------|
| C | 0.037249  | -4.511738 | 0.937264  |
| C | 0.121592  | -5.093443 | -1.428847 |
| H | 0.167523  | -3.448147 | -2.787054 |
| H | 0.004460  | -4.844164 | 1.967237  |
| H | 0.151019  | -5.843308 | -2.212408 |
| O | 0.064090  | -6.767298 | 0.310985  |
| H | 0.092410  | -7.369776 | -0.442662 |
| H | 0.017473  | -2.444905 | 1.408071  |
| O | 0.168293  | 1.112013  | -2.188635 |
| C | -0.001648 | 4.875644  | -0.186877 |
| H | 0.910770  | 5.428530  | -0.441649 |
| H | -0.819046 | 5.460725  | -0.624220 |
| C | -0.154177 | 2.404886  | 1.255443  |
| C | -0.225376 | 3.648684  | 1.953971  |
| H | -0.339175 | 3.627615  | 3.033751  |
| C | -0.154829 | 4.830815  | 1.287285  |
| O | -0.232170 | 1.296111  | 1.992948  |
| H | -0.328816 | 1.499167  | 2.932775  |
| O | -0.210713 | 6.031811  | 1.849093  |
| H | -0.308528 | 5.990008  | 2.811021  |

#### ChNar\_C2a

|   |           |           |           |
|---|-----------|-----------|-----------|
| C | 0.218496  | 2.288962  | -0.157528 |
| C | 0.324475  | 2.383523  | 1.207053  |
| O | 0.249385  | 1.304910  | 1.991128  |
| H | 0.343412  | 1.531061  | 2.926288  |
| C | 0.025536  | 1.035920  | -0.913272 |
| C | -0.063531 | -0.258846 | -0.348499 |
| H | 0.013320  | -0.358775 | 0.718712  |
| C | -0.240409 | -1.361436 | -1.156127 |
| H | -0.303986 | -1.180734 | -2.224973 |
| C | -0.349756 | -2.724346 | -0.753597 |
| C | -0.573385 | -5.444216 | -0.091189 |
| C | -0.511158 | -3.712114 | -1.755521 |
| C | -0.305651 | -3.152795 | 0.598841  |
| C | -0.415691 | -4.482407 | 0.926879  |
| C | -0.620898 | -5.050498 | -1.437616 |
| H | -0.547844 | -3.406577 | -2.795447 |
| H | -0.384730 | -4.818953 | 1.955539  |
| H | -0.742005 | -5.793460 | -2.218735 |
| O | -0.673036 | -6.722872 | 0.302119  |
| H | -0.781330 | -7.319360 | -0.449322 |
| H | -0.186474 | -2.427837 | 1.394471  |

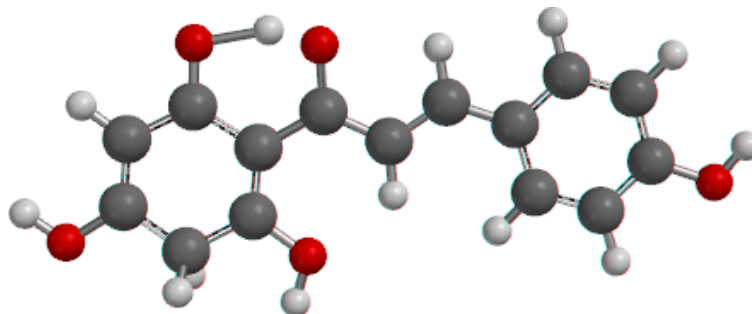

|   |           |          |           |
|---|-----------|----------|-----------|
| O | -0.067450 | 1.133238 | -2.209591 |
| C | 0.307671  | 3.562623 | -0.937659 |
| C | 0.511978  | 4.825116 | -0.265668 |
| H | 0.573881  | 5.700244 | -0.901855 |
| C | 0.620114  | 4.892762 | 1.073446  |
| C | 0.524916  | 3.678079 | 1.934603  |
| H | 1.437068  | 3.607287 | 2.543540  |
| H | -0.302509 | 3.818196 | 2.644321  |
| O | 0.207669  | 3.544147 | -2.176936 |
| H | 0.021091  | 2.125485 | -2.470873 |
| O | 0.813868  | 5.997081 | 1.801310  |
| H | 0.876963  | 6.786590 | 1.246156  |

### ChNar\_C3

|   |           |           |           |
|---|-----------|-----------|-----------|
| C | 0.368354  | 3.654530  | -0.980484 |
| C | 0.392462  | 3.852500  | 1.811707  |
| C | 0.178387  | 2.455954  | -0.194726 |
| C | 0.566304  | 4.892522  | -0.379743 |
| C | 0.579977  | 4.990049  | 1.002904  |
| C | 0.194935  | 2.621578  | 1.221833  |
| H | 0.707528  | 5.769578  | -0.996266 |
| H | 0.398871  | 3.944164  | 2.893592  |
| O | 0.776835  | 6.212514  | 1.531550  |
| H | 0.770099  | 6.186706  | 2.495089  |
| O | 0.366122  | 3.628168  | -2.309748 |
| H | 0.213027  | 2.699612  | -2.602242 |
| C | -0.009013 | 1.200089  | -0.886814 |
| O | -0.035443 | 1.127653  | -2.125812 |
| C | -0.293774 | -1.282245 | -1.043997 |
| H | -0.365973 | -1.017256 | -2.097414 |
| C | -0.311918 | -2.622591 | -0.712247 |
| C | -0.373274 | -5.368382 | -0.155004 |
| C | -0.429545 | -3.593961 | -1.765816 |
| C | -0.223516 | -3.100333 | 0.638432  |
| C | -0.255712 | -4.437765 | 0.912574  |
| C | -0.459598 | -4.933234 | -1.497798 |
| H | -0.494609 | -3.243910 | -2.789981 |
| H | -0.190656 | -4.798039 | 1.933756  |
| H | -0.546661 | -5.676779 | -2.279824 |
| O | -0.407208 | -6.675338 | 0.043026  |
| H | -0.347044 | -6.917549 | 0.978160  |
| H | -0.133162 | -2.391099 | 1.451993  |
| O | 0.003061  | 1.513319  | 2.001217  |
| H | 0.027815  | 1.765750  | 2.931252  |
| C | -0.187413 | -0.128585 | -0.126009 |
| H | 0.614734  | -0.264541 | 0.604770  |

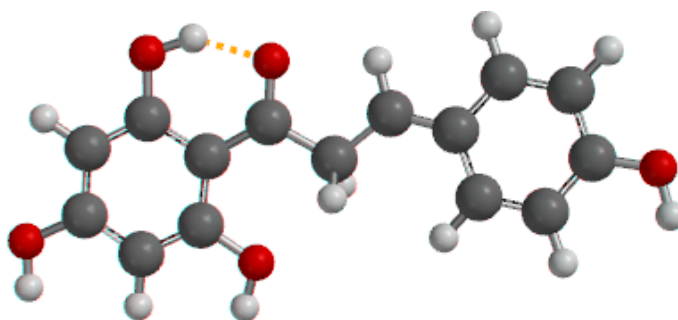

|   |           |           |          |
|---|-----------|-----------|----------|
| H | -1.093991 | -0.063079 | 0.492069 |
|---|-----------|-----------|----------|

**Ts ChNar 1-1'**

|   |           |           |           |
|---|-----------|-----------|-----------|
| C | 0.385164  | 3.571236  | -0.814440 |
| C | 0.325091  | 3.603493  | 1.954816  |
| C | 0.167992  | 2.317328  | -0.148156 |
| C | 0.577805  | 4.762232  | -0.153433 |
| C | 0.550128  | 4.782536  | 1.244071  |
| C | 0.135161  | 2.403836  | 1.283410  |
| H | 0.750339  | 5.685518  | -0.693583 |
| H | 0.287569  | 3.619544  | 3.039544  |
| O | 0.742632  | 5.970974  | 1.830909  |
| H | 0.709074  | 5.909515  | 2.793548  |
| O | -0.108931 | 1.283217  | 1.996440  |
| H | -0.131751 | 1.479952  | 2.940820  |
| C | -0.018185 | 1.080611  | -0.888679 |
| C | -0.054816 | -0.221434 | -0.322483 |
| H | 0.093017  | -0.312838 | 0.736937  |
| C | -0.267533 | -1.331764 | -1.100976 |
| H | -0.425056 | -1.177818 | -2.163789 |
| C | -0.317443 | -2.696556 | -0.662503 |
| C | -0.467239 | -5.400707 | 0.066964  |
| C | -0.563549 | -3.699960 | -1.627888 |
| C | -0.150587 | -3.091894 | 0.686083  |
| C | -0.229859 | -4.422202 | 1.045495  |
| C | -0.643018 | -5.034597 | -1.271087 |
| H | -0.700075 | -3.413174 | -2.664872 |
| H | -0.121304 | -4.732488 | 2.077698  |
| H | -0.848106 | -5.802755 | -2.006415 |
| O | -0.625489 | -6.706390 | 0.443096  |
| H | 0.206847  | -7.193458 | 0.425353  |
| H | 0.032543  | -2.350819 | 1.454316  |
| O | -0.154173 | 1.110518  | -2.204336 |
| H | -0.069916 | 2.015744  | -2.561327 |
| O | 0.410798  | 3.554700  | -2.181395 |
| H | 0.522868  | 4.437901  | -2.554140 |

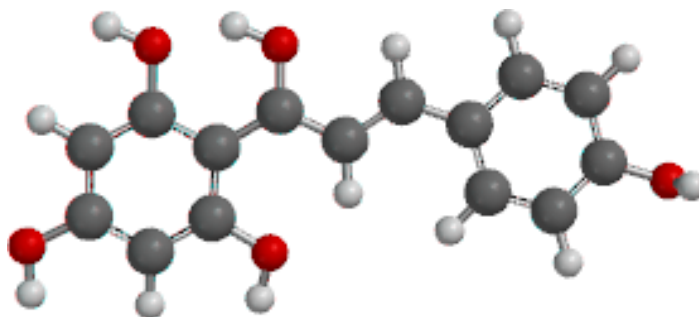

**Ts ChNar 1-1a**

|   |          |          |           |
|---|----------|----------|-----------|
| C | 0.408889 | 3.554648 | -0.781640 |
| C | 0.366104 | 3.598399 | 1.985969  |
| C | 0.196055 | 2.308388 | -0.110354 |
| C | 0.600739 | 4.751520 | -0.119024 |
| C | 0.586832 | 4.771082 | 1.274688  |
| C | 0.174747 | 2.393751 | 1.319240  |
| H | 0.748868 | 5.675289 | -0.666393 |

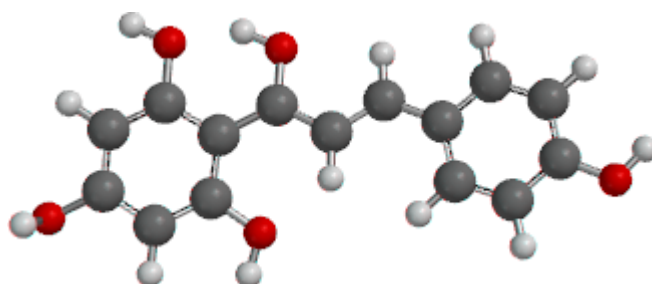

|   |           |           |           |
|---|-----------|-----------|-----------|
| H | 0.323148  | 3.638254  | 3.068654  |
| O | 0.692396  | 5.960203  | 1.936439  |
| H | 1.606840  | 6.173598  | 2.158370  |
| O | -0.061927 | 1.274016  | 2.039227  |
| H | -0.083264 | 1.481988  | 2.981397  |
| C | -0.012000 | 1.065420  | -0.851432 |
| C | -0.055909 | -0.227564 | -0.283739 |
| H | 0.091357  | -0.317150 | 0.776057  |
| C | -0.277368 | -1.343431 | -1.062969 |
| H | -0.427251 | -1.187526 | -2.126659 |
| C | -0.341045 | -2.698462 | -0.625484 |
| C | -0.508855 | -5.403949 | 0.110041  |
| C | -0.575204 | -3.708210 | -1.590776 |
| C | -0.191322 | -3.098275 | 0.728763  |
| C | -0.273965 | -4.420651 | 1.091938  |
| C | -0.658363 | -5.039348 | -1.237361 |
| H | -0.692112 | -3.425503 | -2.631141 |
| H | -0.164128 | -4.735046 | 2.122192  |
| H | -0.838227 | -5.798770 | -1.990756 |
| O | -0.578724 | -6.673629 | 0.537369  |
| H | -0.744104 | -7.286230 | -0.190359 |
| H | -0.012214 | -2.357113 | 1.497569  |
| O | -0.168047 | 1.102560  | -2.166180 |
| H | -0.072238 | 2.007805  | -2.520675 |
| O | 0.426703  | 3.538718  | -2.151078 |
| H | 0.513592  | 4.425218  | -2.521892 |
